# Supplementary material for: A genome-wide DNA methylation signature for SETD1B-related syndrome
Source: Clin Epigenetics. 2019 Nov 4;11:156. doi: 10.1186/s13148-019-0749-3 (PMC6830011; doi:10.1186/s13148-019-0749-3)
Supplement: Supplementary file 1 — Additional file 1: Table S1. The estimation of the cell types distribution and the calculation of P-values of the cell types distribution. [file 13148_2019_749_MOESM1_ESM.xlsx]

## Sheet: CelldistributieEPIC.txt
	Age	CD8T	CD4T	NK	Bcell	Mono	Gran
4_del12q	16.3	0.0463212	0.183908	0.171325	0.110773	0.085128	0.445199				CD8T	CD4T	NK	Bcell	Mono	Gran
dup12q	6	0.0997116	0.156529	0.026897	0.0798323	0.0831064	0.55748			4_del12q	0.0463212	0.183908	0.171325	0.110773	0.085128	0.445199
3_del12q	3	0	-8.6251e-05	0.0120162	0.991581	0	0			dup12q	0.0997116	0.156529	0.026897	0.0798323	0.0831064	0.55748
1_del12q	2.3	0.0139433	0.0394786	0.0243502	0.0367284	0.0803893	0.796314			3_del12q	0	-8.6251e-05	0.0120162	0.991581	0	0
2_mut	16	0.150598	0.173467	0.0665582	0.0538553	0.102933	0.460196			1_del12q	0.0139433	0.0394786	0.0243502	0.0367284	0.0803893	0.796314
6_mut	8	0.125836	0.2695	0.0967253	0.0758294	0.107609	0.344239			2_mut	0.150598	0.173467	0.0665582	0.0538553	0.102933	0.460196
1_mut	13	0.0324474	0.192407	0.0421675	0.0504089	0.0638771	0.631027			6_mut	0.125836	0.2695	0.0967253	0.0758294	0.107609	0.344239
C	16	0.085774	0.156203	0.0167997	0.0502918	0.0786143	0.620688			1_mut	0.0324474	0.192407	0.0421675	0.0504089	0.0638771	0.631027
C	16	0.0614513	0.128785	0.0319144	0.0347321	0.0778303	0.675141			3_mut	0.0883722	0.204242	0.21	0.0870495	0.0487351	0.415696
C	16	0.0810578	0.162392	0.0284998	0.0765141	0.112918	0.541993			4_mut	0.160484	0.135041	0.0593447	0.12039	0.0934386	0.456735
C	16	0.129451	0.150247	0	0.0480402	0.0962159	0.597124			7_mut	0.0836012	0.164626	0.00366255	0.142216	0.0499659	0.582414
C	16	0.134711	0.221936	0.0199136	0.0705862	0.0753412	0.485591			5_mut	0.108936	0.108814	0.0179395	0.0619137	0.0898293	0.642266
C	16	0.0899968	0.126319	0	0.0297879	0.107136	0.654819			2_del12q	0.143327	0.260263	0	0.10813	0.0445259	0.475378
C	16	0.0788736	0.145708	0.0624491	0.0440743	0.0869763	0.594992			5_del12q	0.108143	0.382067	0.0128292	0.148137	0.101755	0.269543
C	16	0.10923	0.249917	0.0726301	0.029355	0.125807	0.41915			C (mean)*	0.105662	0.186207	0.0350821	0.108691	0.077891	0.505941
C	16	0.0980283	0.250648	0.0722309	0.0306641	0.116769	0.431739
C	16	0.1201	0.148089	0.030964	0.103408	0.0689131	0.53991
C	3	0.101325	0.252653	0.038875	0.12807	0.0535235	0.427371
C	3	0.0641937	0.0926455	0.00412208	0.0795032	0.0679735	0.706698
C	3	0.0603138	0.0615972	0	0.0466457	0.108086	0.733382
C	3	0.183812	0.238849	0.00437077	0.206687	0.0555651	0.34081
C	3	0.103953	0.419538	0	0.14101	0.0725845	0.264439
C	3	0.0436755	0.116302	0.0423443	0.0949588	0.127556	0.591218
C	3	0.198403	0.348848	0	0.160963	0.0492311	0.255754
C	3	0.17795	0.233357	0.00663325	0.164486	0.0462955	0.39406
C	2	0.124419	0.296613	0	0.0795512	0.0553549	0.446403
C	3	0.159979	0.185311	0.023979	0.277636	0.0666917	0.323644
C	16	0.056903	0.121906	0.0370707	0.0843153	0.102337	0.630462
C	16	0.0855313	0.191602	0.0520552	0.0888321	0.0882407	0.515003
C	16	0.114289	0.267611	0	0.0662112	0.039856	0.523815
C	16	0.121808	0.206525	0.0519363	0.0324246	0.0591234	0.533631
C	13	0.0313263	0.303121	0.120285	0.0888222	0.112872	0.358196
C	13	0.127346	0.211242	0.0254147	0.104777	0.0490241	0.49524			* the "newborn" control was exluded from the calculation
C	13	0	0.0695472	0.0248832	0.0152951	0.14475	0.745201
C	13	0.080225	0.111172	0.0274641	0.0973002	0.100984	0.605482
C	8	0.122267	0.137133	0.0152936	0.0988319	0.12001	0.515838
C	8	0.126799	0.226125	0.0937639	0.0602606	0.0746723	0.422716
C	8	0.166642	0.220126	0.0141823	0.0845763	0.0326077	0.494731
C	8	0.156438	0.188101	0.0331533	0.096369	0.0707398	0.468318
C	6	0.0886981	0.221731	0	0.0973064	0.0628787	0.538329
C	6	0.115396	0.238574	0.0328463	0.117954	0.045001	0.461474
C	6	0.0646671	0.252441	0	0.0933306	0.0803824	0.527534
C	6	0.0844885	0.230217	0.0950149	0.126528	0.0593077	0.410666
C	3	0.149911	0.282152	0	0.21445	0.045851	0.316317
C	3	0.127289	0.211243	0.038608	0.148533	0.0561882	0.419177
C	3	0.110088	0.265455	0	0.159164	0.0423363	0.429039
C	3	0.115079	0.261236	0	0.170747	0.0733173	0.382774
3_mut	12	0.0883722	0.204242	0.21	0.0870495	0.0487351	0.415696
4_mut	34	0.160484	0.135041	0.0593447	0.12039	0.0934386	0.456735
7_mut	10	0.0836012	0.164626	0.00366255	0.142216	0.0499659	0.582414
5_mut	7	0.108936	0.108814	0.0179395	0.0619137	0.0898293	0.642266
2_del12q	12	0.143327	0.260263	0	0.10813	0.0445259	0.475378
5_del12q	2.6	0.108143	0.382067	0.0128292	0.148137	0.101755	0.269543
C	13	0.147515	0.168091	0.0175224	0.112764	0.0704869	0.520067
C	6	0.136021	0.200867	0.0742519	0.150731	0.0831706	0.398243
C	13	0.0236838	0.0565327	0.0219132	0.0359212	0.136933	0.745767
C	16	0.122835	0.148651	0.0099046	0.0953175	0.107399	0.543832
C	16	0.103299	0.134676	0.0501925	0.0691422	0.0808055	0.600167
C	33.1	0.104411	0.131057	0.149362	0.0356258	0.0497915	0.555629
C	6	0.0785251	0.234832	0	0.095325	0.0847066	0.541442
C	8	0.160805	0.119125	0.0169284	0.134739	0.103847	0.521531
C	3	0.187741	0.260594	0.000693889	0.22282	0.045664	0.322926
C	1	0.0847661	0.0849487	0.0114803	0.10405	0.136907	0.632805
C	33.4	0.0392571	0.120759	0.034304	0.0463704	0.0835719	0.704242
C	3	0.0971494	0.0762019	0.00605028	0.102902	0.0665772	0.694686
C	16	0.0758433	0.119698	0.0288301	0.0431406	0.08631	0.674929
C	3	0.133747	0.233695	0.0296606	0.137546	0.0579659	0.432951
C	6	0.156956	0.209793	0.0256456	0.133056	0.0463797	0.465268
C	33.7	0.120903	0.21249	0.022452	0.0524398	0.0691346	0.555315
C	3	0.157704	0.189001	0.0322276	0.155961	0.0707917	0.424235
C	33.7	0.152185	0.116989	0.132977	0.0587021	0.0641558	0.511592
C	16	0.110689	0.11544	0	0.0293857	0.102399	0.66674
C (newborn)	0.01	0.0917711	0.0939513	0.108313	0.264897	0.121345	0.488074

## Sheet: pval.cell_2_del12q
X	t	df	p	adj.pval
CD8T	0.813415	59	0.419251	1
CD4T	0.975822	59	0.333137	1
NK	-0.884491	59	0.380022	1
Bcell	0.131018	59	0.896207	1
Mono	-1.24629	59	0.217582	1
Gran	-0.316131	59	0.753019	1

## Sheet: pval.cell_5_del12q
X	t	df	p	adj.pval
CD8T	-0.0193828	59	0.984601	1
CD4T	2.6021	59	0.0116972	0.912383
NK	-0.524336	59	0.60201	1
Bcell	0.808854	59	0.421849	1
Mono	0.785116	59	0.435527	1
Gran	-2.00146	59	0.0499487	1

## Sheet: pval.cell_1_del12q
X	t	df	p	adj.pval
CD8T	-2.24907	59	0.0282548	1
CD4T	-1.97201	59	0.0533023	1
NK	-0.200908	59	0.841462	1
Bcell	-1.07873	59	0.285098	1
Mono	0.0267123	59	0.978779	1
Gran	2.31161	59	0.0243098	1

## Sheet: pval.cell_2_mut
X	t	df	p	adj.pval
CD8T	0.985523	59	0.328392	1
CD4T	-0.183045	59	0.85539	1
NK	0.983999	59	0.329134	1
Bcell	-0.788552	59	0.433531	1
Mono	0.826927	59	0.41161	1
Gran	-0.440438	59	0.661229	1

## Sheet: pval.cell_3_del12q
X	t	df	p	adj.pval
CD8T	-2.5791	59	0.0124186	0.968652
CD4T	-2.50026	59	0.015209	1
NK	-0.54716	59	0.586333	1
Bcell	15.0992	59	0	0
Mono	-2.82679	59	0.00640947	0.499938
Gran	-4.2084	59	8.88564e-05	0.0069308

## Sheet: pval.cell_4_del12q
X	t	df	p	adj.pval
CD8T	-1.48269	59	0.143479	1
CD4T	-0.0436408	59	0.965338	1
NK	3.92512	59	0.000229201	0.0178777
Bcell	0.1758	59	0.861053	1
Mono	0.19492	59	0.846125	1
Gran	-0.563232	59	0.575412	1

## Sheet: pval.cell_dup12q
X	t	df	p	adj.pval
CD8T	-0.218946	59	0.827447	1
CD4T	-0.409205	59	0.683871	1
NK	-0.129411	59	0.897473	1
Bcell	-0.348428	59	0.728759	1
Mono	0.12316	59	0.902399	1
Gran	0.356095	59	0.723039	1

## Sheet: pval.cell_6_mut
X	t	df	p	adj.pval
CD8T	0.399422	59	0.691025	1
CD4T	1.09915	59	0.276167	1
NK	1.83088	59	0.0721694	1
Bcell	-0.416248	59	0.678739	1
Mono	0.992891	59	0.324818	1
Gran	-1.38987	59	0.169792	1

## Sheet: pval.cell_1_mut
X	t	df	p	adj.pval
CD8T	-1.81108	59	0.07522	1
CD4T	0.0698255	59	0.944569	1
NK	0.299278	59	0.765779	1
Bcell	-0.846944	59	0.400449	1
Mono	-0.559404	59	0.578003	1
Gran	0.958279	59	0.341833	1

[truncated: 4 more sheets: pval.cell_3_mut, pval.cell_4_mut, pval.cell_7_mut, pval.cell_5_mut]
