# Supplementary material for: A genome-wide DNA methylation signature for SETD1B-related syndrome
Source: Clin Epigenetics. 2019 Nov 4;11:156. doi: 10.1186/s13148-019-0749-3 (PMC6830011; doi:10.1186/s13148-019-0749-3)
Supplement: Supplementary file 3 — Additional file 3: Table S3. Significant differentially methylated CpGs identified in the KDM2B-related group analysis. [file 13148_2019_749_MOESM3_ESM.xlsx]

## Sheet: TopDMPs_KDM2B_p.val0.05_deltabe
rn	chr	pos	Beta	P,Value_beta	adj,P,Val_beta	DeltaBeta	P,Value_M	adj,P,Val_M	DeltaMval	UCSC_RefGene_Name
cg19747604	chr19	46915570	0.64679	7.78001e-14	1.2089e-08	0.305493	3.26034e-23	2.53304e-17	3.23	CCDC8
cg17375267	chr19	46915776	0.629454	1.80552e-07	0.0004992	0.341664	8.88188e-16	3.45027e-10	3.88	CCDC8
cg07701237	chr6	26044220	0.0706236	6.23853e-15	1.61562e-09	0.210717	4.24323e-14	9.58887e-09	2.32	HIST1H2BB;HIST1H3C
cg27635394	chr6	26043820	0.0637753	1.18903e-13	1.53965e-08	0.280714	4.93684e-14	9.58887e-09	2.93	HIST1H2BB
cg05803631	chr1	7844446	0.0445501	1.55833e-15	6.0535e-10	0.261573	4.28121e-13	6.65235e-08	3.67	PER3
cg00399754	chr1	150502364	0.918207	1.84949e-18	1.43691e-12	-0.294472	7.18417e-13	9.30259e-08	-2.95
cg20500085	chr8	119122667	0.371246	1.6624e-12	1.29156e-07	0.305821	1.20915e-12	1.34202e-07	2.01	EXT1
cg00540792	chr11	11024307	0.926547	6.32932e-11	1.96696e-06	-0.21217	1.56012e-12	1.51512e-07	-2.07
cg13790727	chr20	36148738	0.789877	6.94012e-09	5.60127e-05	0.129172	3.05728e-12	2.46516e-07	1.54	BLCAP;BLCAP;BLCAP;BLCAP;NNAT;NNAT;BLCAP
cg15387132	chr6	26044204	0.052613	4.60801e-12	2.4303e-07	0.249256	3.17297e-12	2.46516e-07	2.82	HIST1H2BB;HIST1H3C
cg21577472	chr7	2561029	0.0287947	1.30311e-10	3.49109e-06	0.141332	1.01893e-11	6.59692e-07	2.47	LFNG;LFNG;LFNG;LFNG
cg24512321	chr2	199179548	0.142787	0.00156873	0.243271	-0.139563	9.4397e-12	6.59692e-07	-4.49	LOC101927619
cg05313153	chr8	119122430	0.421453	2.12521e-10	5.50376e-06	0.323469	1.40877e-11	8.41932e-07	2.35	EXT1
cg20307885	chr7	27130090	0.27742	4.80958e-13	5.33811e-08	0.313102	3.83852e-11	2.13017e-06	1.94
cg12681972	chr6	26225299	0.49548	8.05252e-09	6.01557e-05	0.256362	5.83156e-11	3.02045e-06	2.53	HIST1H3E
cg19705352	chr14	80469562	0.935635	4.9409e-10	1.09644e-05	-0.229702	6.51928e-11	3.16562e-06	-2.26
cg01725917	chr18	74037785	0.911857	4.85616e-10	1.09644e-05	-0.188611	1.45998e-10	6.30164e-06	-1.69
cg27507960	chr6	26225246	0.403001	4.59905e-10	1.09644e-05	0.19066	1.7844e-10	7.29655e-06	1.2	HIST1H3E
cg23757721	chr20	36148604	0.744209	1.57818e-07	0.000445863	0.164747	2.0817e-10	8.08663e-06	1.71	BLCAP;BLCAP;BLCAP;BLCAP;NNAT;NNAT;BLCAP
cg22551578	chr20	36148620	0.648897	4.52277e-08	0.000171407	0.218008	2.33922e-10	8.65427e-06	1.76	BLCAP;BLCAP;BLCAP;BLCAP;NNAT;NNAT;BLCAP
cg00028013	chr15	74218697	0.576916	1.54125e-08	8.86986e-05	0.201465	2.53239e-10	8.72437e-06	1.48	LOXL1
cg13685349	chr14	81879247	0.926508	2.18224e-09	2.85098e-05	-0.402655	4.3163e-10	1.34137e-05	-3.33
cg15234492	chr12	122019076	0.370999	2.79783e-09	3.30362e-05	0.344403	4.22206e-10	1.34137e-05	2.35	KDM2B;KDM2B
cg04489586	chr20	36148642	0.661444	7.39351e-09	5.68732e-05	0.144044	6.67198e-10	1.78745e-05	1.07	BLCAP;BLCAP;BLCAP;BLCAP;NNAT;NNAT;BLCAP
cg24675557	chr20	36149081	0.782743	4.92076e-07	0.00109543	0.144538	6.46966e-10	1.78745e-05	1.74	BLCAP;BLCAP;BLCAP;BLCAP;NNAT;NNAT;BLCAP
cg02606058	chr16	67195658	0.816516	9.54607e-08	0.000302724	0.137317	7.5553e-10	1.95663e-05	2.02	FBXL8
cg00721819	chr6	32016520	0.93008	1.77446e-09	2.81895e-05	-0.186861	9.93411e-10	2.46593e-05	-1.77	TNXB
cg06644942	chr2	122248262	0.746397	9.26104e-09	6.38386e-05	-0.400279	1.04741e-09	2.46593e-05	-4.32	CLASP1;CLASP1;CLASP1;CLASP1
cg24775327	chr10	72311997	0.939596	1.91392e-09	2.81895e-05	-0.195956	1.01867e-09	2.46593e-05	-1.93	KIAA1274
cg13836098	chr6	26225268	0.529401	2.06388e-08	0.000102787	0.21478	1.13579e-09	2.52121e-05	1.59	HIST1H3E
cg14121816	chr20	60405326	0.918326	9.20218e-10	1.87519e-05	-0.342991	1.13205e-09	2.52121e-05	-2.74	CDH4;CDH4;CDH4
cg10372921	chr15	74218733	0.472508	4.20812e-09	4.4181e-05	0.200604	1.18478e-09	2.5569e-05	1.27	LOXL1
cg04118464	chr12	120740050	0.141357	0.0028217	0.310288	-0.119648	1.23734e-09	2.59816e-05	-3.98	SIRT4
cg14435807	chr15	74218780	0.396468	4.98858e-10	1.09644e-05	0.186507	1.33069e-09	2.72064e-05	1.12	LOXL1
cg18477674	chr10	133793527	0.53888	3.17138e-07	0.000784688	0.332908	1.57025e-09	3.04992e-05	2.66	BNIP3
cg08855861	chr1	52498679	0.0624515	7.31626e-12	3.34363e-07	0.135326	1.61111e-09	3.05295e-05	1.92	TXNDC12;KTI12
cg05758480	chr2	242449337	0.92192	2.15871e-09	2.85098e-05	-0.253817	1.73423e-09	3.208e-05	-2.11	STK25;STK25;STK25;STK25;STK25;STK25;STK25;STK25
cg09816218	chr7	5001117	0.844874	1.97422e-12	1.39438e-07	-0.199037	2.0167e-09	3.49619e-05	-1.6
cg13122744	chr1	146651298	0.91152	1.59082e-09	2.68684e-05	-0.227742	2.02502e-09	3.49619e-05	-1.92	PDIA3P1
cg14016875	chr17	14206981	0.440886	7.0858e-09	5.61748e-05	0.270644	2.12115e-09	3.58254e-05	1.76	HS3ST3B1;MGC12916
cg23566989	chr11	65513058	0.915343	1.1489e-09	2.12525e-05	-0.28831	3.129e-09	5.17233e-05	-2.26
cg10156791	chr8	96081646	0.922953	1.80789e-09	2.81895e-05	-0.163629	3.50913e-09	5.59393e-05	-1.52
cg16619378	chr17	14207530	0.552631	5.18536e-08	0.000191839	0.216908	3.74331e-09	5.59393e-05	1.53	HS3ST3B1;MGC12916
cg16794749	chr10	113939632	0.932086	2.84119e-09	3.30362e-05	-0.235467	3.74405e-09	5.59393e-05	-2.24	GPAM
cg20652404	chr15	74218904	0.457309	4.81246e-09	4.75364e-05	0.186415	3.55252e-09	5.59393e-05	1.13	LOXL1;LOXL1
cg21250296	chr6	26044405	0.0818033	4.69216e-12	2.4303e-07	0.266948	3.73288e-09	5.59393e-05	2.59	HIST1H2BB;HIST1H3C
cg03245462	chr5	11290166	0.897645	2.12525e-09	2.85098e-05	-0.155423	3.89209e-09	5.59974e-05	-1.35	CTNND2;CTNND2;CTNND2;CTNND2;CTNND2
cg18085549	chr5	141901577	0.927311	2.15523e-09	2.85098e-05	-0.182876	3.83805e-09	5.59974e-05	-1.79
cg12382960	chr14	81672132	0.913489	9.65445e-10	1.87519e-05	-0.195128	4.09756e-09	5.78816e-05	-1.85	GTF2A1;GTF2A1;GTF2A1
cg11740797	chr2	159751325	0.882193	1.36692e-09	2.41363e-05	-0.167708	4.61921e-09	6.03209e-05	-1.39
cg16382722	chr16	314174	0.948428	2.84101e-09	3.30362e-05	-0.338055	4.6545e-09	6.03209e-05	-3.08	ITFG3
cg23471067	chr10	133793477	0.458406	7.23598e-08	0.000240248	0.296325	4.55941e-09	6.03209e-05	2.03	BNIP3
cg04212595	chr2	235017357	0.862034	6.0365e-11	1.95413e-06	-0.111661	5.19826e-09	6.49081e-05	-1.06
cg09570958	chr17	14206774	0.217327	1.75447e-09	2.81895e-05	0.212063	5.34688e-09	6.49081e-05	1.48	HS3ST3B1;MGC12916
cg14252059	chr11	120973274	0.910431	3.32881e-09	3.67377e-05	-0.214269	5.10651e-09	6.49081e-05	-1.87	TECTA
cg24324270	chr4	137021443	0.879961	9.91779e-09	6.64256e-05	-0.433616	5.28171e-09	6.49081e-05	-5.54
cg00791430	chr14	104979474	0.890497	9.02589e-11	2.5972e-06	-0.250444	6.1293e-09	6.90145e-05	-2.18
cg02221866	chr6	26044338	0.0496637	4.78781e-11	1.63526e-06	0.187903	5.8567e-09	6.90145e-05	2.44	HIST1H2BB;HIST1H3C
cg11097291	chr10	103050242	0.545402	9.08006e-08	0.000292718	0.264067	6.07052e-09	6.90145e-05	1.8
cg14645844	chr8	123831620	0.936717	2.74024e-09	3.30362e-05	-0.246739	6.08235e-09	6.90145e-05	-2.28	ZHX2
cg26092675	chr6	26225258	0.64702	2.83437e-07	0.00071265	0.157535	6.00256e-09	6.90145e-05	1.52	HIST1H3E
cg04436755	chr15	74218767	0.475127	1.6885e-08	9.21305e-05	0.199207	6.21907e-09	6.90249e-05	1.23	LOXL1
cg00875541	chr6	31778942	0.576274	4.05266e-08	0.000158357	0.177811	6.36761e-09	6.96781e-05	1.35	HSPA1L
cg00809871	chr1	19427621	0.930831	3.12262e-09	3.5677e-05	-0.17028	6.6242e-09	7.14792e-05	-1.62	UBR4
cg05734456	chr6	41516085	0.142088	5.22098e-12	2.53519e-07	0.196378	7.55974e-09	7.46184e-05	1.63	FOXP4;FOXP4;FOXP4
cg08839668	chr9	127356192	0.107081	5.12214e-09	4.85371e-05	0.213418	7.58742e-09	7.46184e-05	1.78	NR6A1;NR6A1;NR6A1
cg20038789	chr3	148803510	0.119516	6.67666e-11	1.9951e-06	0.113141	7.3166e-09	7.46184e-05	1.2	HLTF;HLTF
cg22478210	chr6	26043990	0.118693	7.31325e-10	1.53563e-05	0.156914	7.2169e-09	7.46184e-05	1.27	HIST1H2BB
cg26149875	chr6	26225282	0.70359	1.91455e-06	0.00315809	0.166439	7.53137e-09	7.46184e-05	2.26	HIST1H3E
cg27088635	chr4	44681143	0.0405255	3.51913e-09	3.74533e-05	0.274458	7.50351e-09	7.46184e-05	2.62	GUF1
cg22463529	chr2	242749271	0.865332	1.07951e-09	2.04561e-05	-0.261328	7.92226e-09	7.59876e-05	-2.09	NEU4;NEU4
cg26083330	chr20	36148615	0.770217	6.30124e-07	0.00131957	0.121957	8.05026e-09	7.62736e-05	1.28	BLCAP;BLCAP;BLCAP;BLCAP;NNAT;NNAT;BLCAP
cg00378218	chr17	1546841	0.0532388	4.84102e-11	1.63526e-06	0.113004	8.90694e-09	8.33736e-05	1.71	SCARF1;SCARF1;SCARF1;SCARF1;SCARF1
cg23518838	chr6	116323950	0.894132	1.88264e-09	2.81895e-05	-0.181989	9.15792e-09	8.3706e-05	-1.48	FRK
cg10344698	chr7	138270134	0.905447	2.84896e-09	3.30362e-05	-0.133601	1.0906e-08	9.41457e-05	-1.3	TRIM24;TRIM24
cg10981598	chr20	36148699	0.670235	3.46986e-07	0.000839818	0.16555	1.17638e-08	9.93434e-05	1.29	BLCAP;BLCAP;BLCAP;BLCAP;NNAT;NNAT;BLCAP
cg01828275	chr2	71505083	0.084007	1.89216e-09	2.81895e-05	0.270984	1.21394e-08	0.000101413	2.3
cg19297971	chr20	60562543	0.926212	1.58318e-09	2.68684e-05	-0.229236	1.34191e-08	0.000110911	-2.05	TAF4
cg14374799	chr8	21882942	0.642785	1.01861e-06	0.00194754	0.187766	1.36808e-08	0.000111884	1.46	NPM2
cg07485417	chr8	21882851	0.619742	3.27173e-06	0.00488824	0.233314	1.57694e-08	0.000125017	1.78	NPM2
cg18433380	chr20	36149194	0.743192	5.1402e-07	0.00113138	0.134043	1.64556e-08	0.000128613	1.27	BLCAP;BLCAP;BLCAP;BLCAP;NNAT;NNAT;BLCAP
cg18857767	chr2	178043005	0.903615	1.56491e-08	8.87458e-05	-0.452209	1.67197e-08	0.000128613	-5.85
cg03690787	chr7	155508326	0.933459	5.56673e-09	4.98445e-05	-0.180026	1.99806e-08	0.000149098	-1.76	RBM33
cg12594244	chr15	74218754	0.538244	2.38585e-08	0.00011266	0.137202	2.03582e-08	0.000149098	0.86	LOXL1
cg13612011	chr8	91722622	0.891044	4.83364e-09	4.75364e-05	-0.154544	2.00934e-08	0.000149098	-1.29
cg15466909	chr8	144842965	0.334116	7.37821e-09	5.68732e-05	0.202531	2.04125e-08	0.000149098	1.23
cg20814813	chr1	247506185	0.921496	4.43477e-09	4.53352e-05	-0.198046	2.06888e-08	0.000149098	-1.74
cg21156577	chr6	32163485	0.0291981	4.70373e-09	4.74603e-05	0.244247	2.0918e-08	0.000149098	2.96	NOTCH4;GPSM3
cg22540514	chr8	41050652	0.272143	3.69695e-05	0.0277244	-0.133318	2.17491e-08	0.000153613	-3.41
cg01314530	chr3	193041997	0.892535	4.3279e-09	4.48327e-05	-0.194284	2.23484e-08	0.000156424	-1.52	ATP13A5
cg22431272	chr2	157063133	0.915377	2.15016e-09	2.85098e-05	-0.122426	2.2836e-08	0.000158409	-1.3	LOC101929378;LOC101929378
cg21249371	chr12	122019117	0.42423	1.88801e-06	0.00313055	0.326815	2.4079e-08	0.000164102	2.57	KDM2B;KDM2B
cg06037963	chr2	242716559	0.920155	5.93196e-09	5.12076e-05	-0.217377	2.44848e-08	0.000165416	-1.87	GAL3ST2
cg14765818	chr20	36148954	0.664943	2.68931e-07	0.00069185	0.141387	2.5055e-08	0.000167809	1.08	BLCAP;BLCAP;BLCAP;BLCAP;NNAT;NNAT;BLCAP
cg14141984	chr16	30992128	0.899682	2.71118e-09	3.30362e-05	-0.252472	2.53404e-08	0.00016827	-2.07	SETD1A
cg01360627	chr6	31544931	0.783739	0.000512037	0.141451	0.157385	2.58116e-08	0.000169946	2.31	TNF
cg11650704	chr1	154556575	0.924729	4.9419e-09	4.79935e-05	-0.236706	2.64934e-08	0.000172969	-2.07	ADAR;ADAR;ADAR;ADAR
cg02482001	chr17	6338476	0.856096	4.00682e-08	0.00015802	-0.420699	2.82388e-08	0.000176931	-4.49	AIPL1;AIPL1;AIPL1;AIPL1;AIPL1;AIPL1
cg12230584	chr11	8653170	0.916601	5.41723e-09	4.98445e-05	-0.161992	2.8994e-08	0.000178779	-1.51	TRIM66
cg16019317	chr4	71767673	0.129645	7.77499e-13	7.55072e-08	0.156273	2.89e-08	0.000178779	1.48	MOB1B;MOB1B;MOB1B
cg17686460	chr3	59393809	0.914313	6.99326e-09	5.60127e-05	-0.196781	3.24358e-08	0.000198427	-1.65
cg06845829	chr3	129076926	0.89927	1.1756e-08	7.53224e-05	-0.434447	3.69001e-08	0.000223845	-4.24
cg10494843	chr3	13681619	0.796681	1.40888e-08	8.40671e-05	-0.281956	3.71671e-08	0.000223845	-1.87
cg26136953	chr12	132448331	0.874249	5.55905e-09	4.98445e-05	-0.141708	3.9935e-08	0.000235049	-1.22	EP400
cg15528579	chr12	70094300	0.913862	9.15852e-09	6.38386e-05	-0.177812	4.13164e-08	0.000241351	-1.56	BEST3
cg13151425	chr7	2561116	0.38483	9.90007e-09	6.64256e-05	0.249943	4.36532e-08	0.000253099	1.49	LFNG;LFNG;LFNG;LFNG
cg25140612	chr6	63553575	0.894165	2.92642e-10	7.33421e-06	-0.117379	4.43817e-08	0.000255416	-1.28
cg07529210	chr12	122019110	0.469797	8.19597e-07	0.00164115	0.265249	5.0102e-08	0.00028343	1.84	KDM2B;KDM2B
cg14782678	chr17	7339721	0.525562	3.81843e-07	0.000895873	0.187849	5.07087e-08	0.00028343	1.25	TMEM102
cg14363146	chr9	6704178	0.0317166	3.28116e-09	3.67377e-05	0.191549	5.22594e-08	0.000290011	2.47
cg18163342	chr14	105332627	0.572496	7.81018e-08	0.000257115	0.128828	5.34548e-08	0.000294541	0.8	KIAA0284;KIAA0284
cg12121586	chr2	25453284	0.907741	5.7145e-09	5.03658e-05	-0.203492	5.89171e-08	0.000313521	-1.65
cg25562106	chr6	149891579	0.921966	6.55961e-09	5.47991e-05	-0.188619	5.85241e-08	0.000313521	-1.64	C6orf72
cg19722021	chr1	162722492	0.894877	1.46218e-08	8.54137e-05	-0.183975	6.37941e-08	0.000332638	-1.56	DDR2;DDR2
cg27297558	chr14	53878048	0.929868	8.86915e-09	6.3217e-05	-0.202513	6.50705e-08	0.000336549	-1.87
cg23785897	chr14	103805370	0.911071	1.26e-08	7.89455e-05	-0.184612	6.82825e-08	0.000349015	-1.67	EIF5;EIF5
cg16992340	chr19	22710698	0.74491	2.66118e-05	0.0222076	0.185619	7.12405e-08	0.000361755	2.13	LOC101929124
cg20613350	chr9	6704323	0.0293509	5.12282e-09	4.85371e-05	0.194589	7.19762e-08	0.000363117	2.49
cg00042914	chr18	24446311	0.840724	7.48516e-09	5.70137e-05	-0.117982	7.56647e-08	0.000376832	-0.93	C18orf16;AQP4
cg05358848	chr7	44579475	0.827176	1.97205e-08	9.94893e-05	-0.228268	7.5424e-08	0.000376832	-1.57	NPC1L1;NPC1L1
cg20586971	chr18	2946803	0.85491	1.43986e-08	8.47468e-05	-0.141128	7.69756e-08	0.000380919	-1.14	LPIN2;LOC727896
cg07444617	chr16	14398064	0.614831	3.69244e-07	0.00087196	0.155423	7.85381e-08	0.000386191	1.05
cg22047901	chr7	129415994	0.56941	1.47922e-07	0.000423635	0.131318	8.03378e-08	0.000392556	0.83	MIR183;MIR96
cg03832440	chr17	14207241	0.255698	3.35731e-09	3.67377e-05	0.258166	8.32693e-08	0.000401133	1.69	HS3ST3B1;MGC12916
cg11004272	chr1	181160676	0.939072	6.23005e-09	5.31898e-05	-0.174311	8.4665e-08	0.000401133	-1.75
cg26457023	chr9	6704282	0.0249845	5.58159e-09	4.98445e-05	0.167502	8.3607e-08	0.000401133	2.46
cg09032957	chr18	13539059	0.254761	1.96513e-06	0.00322101	-0.195077	8.96595e-08	0.000418932	-2.68	LDLRAD4;LDLRAD4
cg22417733	chr6	153303409	0.13987	8.77733e-09	6.31418e-05	0.268231	9.00496e-08	0.000418932	1.89	FBXO5;FBXO5
cg11585280	chr1	25292059	0.830028	1.3458e-08	8.23297e-05	-0.204544	9.26498e-08	0.000425928	-1.45	RUNX3
cg03489221	chr5	173241526	0.935403	9.28503e-09	6.38386e-05	-0.206053	9.62871e-08	0.000440046	-1.86
cg25962605	chr20	36149452	0.636731	1.81347e-07	0.000499619	0.107281	9.70081e-08	0.000440748	0.72	BLCAP;NNAT;BLCAP;BLCAP;BLCAP;BLCAP;NNAT
cg26572811	chr17	14206901	0.369877	1.05555e-07	0.000328032	0.276614	9.81259e-08	0.000443235	1.74	HS3ST3B1;MGC12916
cg09043250	chr6	27831707	0.517602	2.21421e-07	0.000589134	0.141243	9.8731e-08	0.00044339	0.88	HIST1H2AL
cg06649410	chr6	154360483	0.19681	1.73947e-07	0.000482657	0.366503	1.01692e-07	0.000454061	3.04	OPRM1;OPRM1;OPRM1;OPRM1;OPRM1;OPRM1;OPRM1;OPRM1;OPRM1;OPRM1;OPRM1;OPRM1;OPRM1;OPRM1;OPRM1;OPRM1;OPRM1;OPRM1;OPRM1;OPRM1
cg04800585	chr6	26043546	0.173896	3.49812e-09	3.74533e-05	0.322498	1.02566e-07	0.000455347	2.31	HIST1H2BB
cg07981118	chr3	173854160	0.900436	1.28205e-08	7.96847e-05	-0.162023	1.06551e-07	0.000467695	-1.43	NLGN1
cg08347471	chr19	36297670	0.949755	8.77417e-09	6.31418e-05	-0.282257	1.12317e-07	0.000479788	-2.62	PRODH2
cg10536999	chr7	26193109	0.0743368	1.16237e-12	1.00341e-07	0.291899	1.12305e-07	0.000479788	3.16	NFE2L3
cg12047941	chr11	315908	0.829704	2.84265e-05	0.0231501	0.120927	1.10094e-07	0.000479788	1.97
cg26995224	chr12	121974146	0.588232	1.30901e-06	0.00231137	0.220419	1.11072e-07	0.000479788	1.53	KDM2B;KDM2B
cg27187252	chr22	40754306	0.932007	1.24792e-08	7.88243e-05	-0.191468	1.12394e-07	0.000479788	-1.73	ADSL;ADSL
cg05215605	chr7	92352149	0.879576	9.39783e-09	6.40474e-05	-0.190024	1.13633e-07	0.000480168	-1.43	CDK6;CDK6
cg09522226	chr22	28501343	0.926817	1.01643e-08	6.74948e-05	-0.208472	1.13719e-07	0.000480168	-1.87	TTC28
cg00891611	chr1	108066602	0.917653	5.35933e-09	4.98445e-05	-0.218493	1.19367e-07	0.000495932	-1.78
cg23566503	chr20	36149750	0.592162	3.8283e-07	0.000895873	0.144361	1.21762e-07	0.000503192	0.94	NNAT;BLCAP;NNAT;BLCAP;BLCAP;BLCAP;BLCAP
cg05351447	chr10	119120604	0.726396	1.41749e-08	8.40671e-05	-0.21323	1.32976e-07	0.000539149	-1.4	PDZD8
cg14683653	chr5	127548547	0.927928	1.1709e-08	7.53224e-05	-0.223744	1.31543e-07	0.000539149	-1.96
ch,5,1161320F	chr5	60527978	0.123271	8.10931e-05	0.0466	-0.110183	1.32047e-07	0.000539149	-3.24
cg11871864	chr8	23790197	0.905897	8.4252e-09	6.23404e-05	-0.193612	1.35556e-07	0.000545665	-1.52
cg23605670	chr20	36148672	0.647972	1.32221e-06	0.00232938	0.147223	1.36714e-07	0.000545665	1.07	BLCAP;BLCAP;BLCAP;BLCAP;NNAT;NNAT;BLCAP
cg23713008	chr1	222224071	0.810098	4.88827e-08	0.000181714	-0.398674	1.36956e-07	0.000545665	-3.26
cg24808901	chr1	95698954	0.694196	4.92084e-06	0.00661439	0.200624	1.38761e-07	0.000550036	1.83	RWDD3;RWDD3
cg15232205	chr18	19414595	0.906137	1.18278e-08	7.53224e-05	-0.174497	1.4414e-07	0.000559928	-1.53	MIB1
cg19121956	chr8	125172022	0.907159	1.70137e-08	9.21305e-05	-0.173437	1.43694e-07	0.000559928	-1.42	FER1L6-AS2
cg01899253	chr13	29070056	0.297155	1.3686e-08	8.24265e-05	0.20726	1.50877e-07	0.000577437	1.33	FLT1;FLT1;FLT1;FLT1
cg06484167	chr6	27832180	0.423927	1.53503e-06	0.00261535	0.374603	1.50311e-07	0.000577437	2.57	HIST1H2AL
cg16577651	chr10	94820236	0.469438	1.02884e-06	0.00194831	0.180441	1.52158e-07	0.000578528	1.1	CYP26C1
cg25517361	chr12	10124084	0.291861	5.51565e-06	0.00722637	-0.117236	1.53396e-07	0.000578528	-1.09	CLEC12A;CLEC12A;CLEC12A;CLEC12A;CLEC12A;CLEC12A;CLEC12A
cg16648571	chr20	36149231	0.637999	1.15737e-06	0.00211574	0.146751	1.54573e-07	0.000580153	1.07	BLCAP;BLCAP;BLCAP;BLCAP;NNAT;NNAT;BLCAP
cg12862537	chr20	36148679	0.678917	1.4925e-06	0.00258253	0.138588	1.57269e-07	0.000587431	1.07	BLCAP;BLCAP;BLCAP;BLCAP;NNAT;NNAT;BLCAP
cg02993991	chr19	4064177	0.572075	8.39314e-06	0.00983093	0.174593	1.58584e-07	0.000589511	1.53	ZBTB7A
cg14490428	chr10	89841521	0.904167	1.79329e-08	9.41387e-05	-0.181955	1.60965e-07	0.000595512	-1.59
cg07085925	chr9	116736673	0.886789	2.20606e-08	0.000107433	-0.200326	1.65036e-07	0.000607679	-1.75	ZNF618
cg19076479	chr6	130342336	0.134434	0.00236949	0.288997	-0.11936	1.86724e-07	0.000677899	-3.43	L3MBTL3;L3MBTL3
cg20783699	chr20	36148767	0.799505	1.4753e-05	0.0147706	0.11262	1.95034e-07	0.000701514	1.33	BLCAP;BLCAP;BLCAP;BLCAP;NNAT;NNAT;BLCAP
cg15390444	chr10	133793442	0.662132	3.66653e-06	0.00533449	0.164062	2.01366e-07	0.000720951	1.28	BNIP3
cg05355684	chr16	88720379	0.921698	1.0995e-08	7.17837e-05	-0.263591	2.05731e-07	0.000726534	-2.09	MVD
cg07665535	chr16	14397756	0.414978	1.60625e-07	0.000450519	0.10477	2.05421e-07	0.000726534	0.62	MIR193B
cg25847633	chr6	35744230	0.217112	0.00458827	0.37049	-0.147875	2.05077e-07	0.000726534	-3.31	C6orf126
cg04585937	chr14	101506532	0.867863	1.1918e-07	0.000360287	-0.385699	2.14055e-07	0.000746275	-3.01	MIR376B;MIR654;MIR300;MIR376A1
cg13587552	chr1	1216441	0.852412	1.63589e-08	9.20987e-05	-0.196817	2.12339e-07	0.000746275	-1.47	SCNN1D;SCNN1D
cg21798667	chr4	6718605	0.0666901	3.2101e-12	2.07833e-07	0.113222	2.14203e-07	0.000746275	1.71	CNO;CNO
cg08781728	chr8	21882587	0.515373	1.51842e-06	0.00260061	0.216655	2.18742e-07	0.000758687	1.41	NPM2
cg18963953	chr6	99288299	0.230276	3.77958e-07	0.000889833	0.101162	2.26068e-07	0.000776014	0.75
cg10660302	chr19	49616652	0.902951	1.08422e-08	7.13864e-05	-0.20783	2.32789e-07	0.000793242	-1.68	LIN7B;LIN7B
cg16592121	chr10	133794558	0.323187	4.36222e-08	0.000166951	0.122404	2.34511e-07	0.000795622	0.76	BNIP3
cg05654364	chr5	148929172	0.186675	1.23716e-09	2.2353e-05	0.283661	2.40078e-07	0.000804369	2	CSNK1A1;CSNK1A1
cg11096309	chr7	46694209	0.401773	2.93811e-07	0.00073163	0.246346	2.42813e-07	0.000804369	1.48
cg14633455	chr9	115819158	0.0271613	6.90078e-09	5.60127e-05	0.179941	2.42356e-07	0.000804369	2.39	ZFP37
cg26299057	chr15	100262282	0.919944	1.77937e-08	9.40433e-05	-0.192944	2.42514e-07	0.000804369	-1.68
cg03745598	chr9	6704327	0.0360179	8.01809e-09	6.01557e-05	0.184019	2.49274e-07	0.000820392	2.29
cg07412232	chr6	29495773	0.916843	2.53787e-08	0.000116671	-0.172098	2.53657e-07	0.000820392	-1.53
cg14992524	chr8	10586135	0.579931	8.41029e-07	0.00166688	0.147041	2.55128e-07	0.000820392	0.94	SOX7
cg05219493	chr10	94820923	0.698933	5.47273e-06	0.00718225	0.163073	2.57825e-07	0.000824323	1.43	CYP26C1
cg13269555	chr10	102822002	0.48171	2.80543e-07	0.000707664	0.127775	2.68589e-07	0.000844831	0.76	KAZALD1
cg27490029	chr17	35774430	0.915089	1.92816e-08	9.85549e-05	-0.138481	2.78434e-07	0.000872265	-1.29	TADA2A;TADA2A;TADA2A;TADA2A
cg08077178	chr2	231134080	0.899806	2.4509e-05	0.0208906	-0.445055	2.98528e-07	0.000920371	-5.76	SP140;SP140;SP140;SP140
cg18936519	chr3	129074010	0.909006	2.40949e-08	0.00011266	-0.360107	2.97961e-07	0.000920371	-2.7
cg06691520	chr10	95517738	0.346441	6.0983e-08	0.000213085	0.116598	3.19015e-07	0.000968166	0.71	LGI1;LGI1
cg00789545	chr14	102770909	0.21512	9.55984e-05	0.051794	-0.136358	3.30127e-07	0.000994124	-1.93	RAGE
cg00478022	chr10	134887961	0.903717	1.89239e-08	9.84529e-05	-0.299661	3.35311e-07	0.00100197	-2.3
cg13443605	chr17	14207036	0.117795	3.44193e-11	1.33706e-06	0.2958	3.35014e-07	0.00100197	2.58	HS3ST3B1;MGC12916
cg09373015	chr6	41338895	0.756253	5.35383e-06	0.00703937	0.155414	3.46234e-07	0.00103064	1.71
cg11213150	chr9	129884457	0.656285	3.81202e-06	0.00543924	0.176662	3.52459e-07	0.00104119	1.35	ANGPTL2;RALGPS1
cg17743250	chr10	94820927	0.709786	2.14565e-05	0.0193388	0.183686	3.52374e-07	0.00104119	1.91	CYP26C1
cg07611171	chr5	55438332	0.846288	2.9942e-08	0.000132174	-0.176987	3.58085e-07	0.00105381	-1.25	ANKRD55
cg06514003	chr17	40330907	0.487934	2.03653e-07	0.0005513	0.129871	3.62078e-07	0.00105754	0.76	KCNH4
cg00362406	chr1	7508625	0.900063	2.3021e-08	0.000111091	-0.211141	3.69971e-07	0.00107655	-1.64	CAMTA1
cg19814934	chr5	42950152	0.187601	2.56736e-08	0.000117332	0.401366	3.74074e-07	0.0010804	2.78
cg25148282	chr17	56561060	0.859046	3.17427e-08	0.000136049	-0.149153	3.72949e-07	0.0010804	-1.2	HSF5
cg08288016	chr4	187590536	0.679709	6.07832e-05	0.0387916	0.194303	3.78437e-07	0.00108895	1.66	FAT1
cg16799791	chr11	47243427	0.909466	2.33675e-08	0.000112066	-0.158478	3.79959e-07	0.0010893	-1.33	DDB2;DDB2
cg01364202	chr15	25926097	0.919347	2.21248e-08	0.000107433	-0.229411	3.94007e-07	0.00112542	-1.92	ATP10A
cg16289485	chr12	111475128	0.697538	0.00013088	0.0637115	0.197158	3.99498e-07	0.00113692	1.89	CUX2
cg26418770	chr17	14206886	0.306032	9.21285e-08	0.000294555	0.192127	4.02679e-07	0.00114179	1.19	HS3ST3B1;MGC12916
cg12958778	chr4	6912474	0.675722	7.70613e-06	0.00928229	0.148007	4.20314e-07	0.00118316	1.14	TBC1D14;TBC1D14
cg19419291	chr5	95295965	0.782508	0.000280678	0.101773	0.116318	4.23805e-07	0.00118868	1.81	ELL2
cg15400655	chr4	107995	0.589432	1.13614e-05	0.0121919	0.197281	4.28989e-07	0.00119889	1.48	ZNF718
cg14016089	chr9	115818857	0.0489306	9.00296e-09	6.35874e-05	0.165476	4.75921e-07	0.00132055	1.78	ZFP37
cg15321154	chr12	10332007	0.898122	3.18704e-08	0.000136049	-0.202954	4.78713e-07	0.00132357	-1.67	TMEM52B;TMEM52B;TMEM52B
cg00097237	chr7	135483974	0.913402	1.77543e-08	9.40433e-05	-0.291415	4.81214e-07	0.00132577	-2.19
cg00432840	chr19	710187	0.689479	0.000193103	0.0812086	0.1931	4.89132e-07	0.00133809	1.89	PALM;PALM
cg12542255	chr19	45976195	0.228683	4.82916e-07	0.00107813	0.293598	4.87559e-07	0.00133809	2.1	FOSB;FOSB
cg14281592	chr9	129884313	0.584626	1.60558e-06	0.00272417	0.163661	5.06319e-07	0.00136142	1.06	ANGPTL2;RALGPS1
cg15956247	chr7	75479840	0.244029	6.13599e-05	0.0389796	-0.111246	5.02084e-07	0.00136142	-1.1
cg18201700	chr17	53219594	0.909739	1.91349e-08	9.84529e-05	-0.115904	5.05931e-07	0.00136142	-1.04	STXBP4
cg21313071	chr20	49640589	0.774218	5.36306e-05	0.0357963	0.121073	5.06421e-07	0.00136142	1.38	KCNG1
cg05976840	chr16	67189804	0.718469	2.89984e-06	0.00442625	0.125388	5.19714e-07	0.00138824	1.04	TRADD
cg22195036	chr1	3614517	0.956207	8.72546e-09	6.31418e-05	-0.151753	5.19972e-07	0.00138824	-1.88	TP73;TP73;TP73;TP73;TP73;TP73;TP73;TP73;TP73;TP73;TP73;TP73;TP73
cg07165288	chr3	114261297	0.91415	2.73609e-08	0.000124002	-0.186586	5.25223e-07	0.00139746	-1.47	ZBTB20;ZBTB20;ZBTB20;ZBTB20;ZBTB20;ZBTB20
cg07622766	chr3	46547809	0.788367	2.01161e-08	0.00010083	-0.183584	5.29573e-07	0.00140423	-1.22
cg12260379	chr2	86332162	0.443609	5.4833e-07	0.00118336	0.146201	5.34599e-07	0.00141273	0.87	PTCD3;POLR1A
cg01358262	chr15	30334898	0.866565	4.85914e-08	0.000181499	-0.144991	5.44256e-07	0.00143337	-1.15
cg10184431	chr6	27783226	0.358131	1.41753e-07	0.000414027	0.195022	5.49378e-07	0.00144198	1.17	HIST1H2AJ;HIST1H2BM;HIST1H2BM
cg11618471	chr4	11771126	0.897135	2.75421e-08	0.000124002	-0.20885	5.73421e-07	0.00150001	-1.57
cg01869058	chr6	31926196	0.607814	8.81886e-07	0.0017215	0.108668	5.77635e-07	0.00150597	0.7	RDBP;SKIV2L;MIR1236
cg10363320	chr21	27083366	0.820721	1.06199e-07	0.000328719	-0.216644	5.91228e-07	0.00153113	-1.45	JAM2;JAM2;JAM2;JAM2
cg00312217	chr5	96063813	0.895415	1.6794e-08	9.21305e-05	-0.157608	6.12487e-07	0.00157705	-1.44	CAST;CAST;CAST;CAST;CAST
cg06510568	chr16	67574244	0.91837	2.46824e-08	0.000114145	-0.202683	6.15049e-07	0.00157705	-1.69	FAM65A;FAM65A;FAM65A;FAM65A
cg18570712	chr10	3201256	0.928569	1.90198e-08	9.84529e-05	-0.169878	6.13758e-07	0.00157705	-1.52	PITRM1;PITRM1;PITRM1
cg26144242	chr14	70737230	0.912284	3.40858e-08	0.000139379	-0.181282	6.22257e-07	0.00158507	-1.54
cg16173140	chr15	33306169	0.875231	4.00041e-08	0.00015802	-0.1717	6.90939e-07	0.00174856	-1.25	FMN1;FMN1
cg15566622	chr12	4014364	0.726158	1.00506e-05	0.0112192	-0.290365	6.99543e-07	0.00176458	-2.6
cg02531924	chr5	1522816	0.701235	6.32865e-05	0.0395884	0.1522	7.27348e-07	0.00181702	1.39	LPCAT1
cg08552695	chr2	206853388	0.927968	2.3773e-08	0.00011266	-0.142247	7.44108e-07	0.00185293	-1.38
cg12130768	chr17	9550545	0.478235	7.2453e-07	0.00147357	0.154786	7.62679e-07	0.00188609	0.92	USP43
cg17014052	chr13	73914405	0.855423	9.54628e-08	0.000302724	-0.14671	7.6693e-07	0.00188609	-1.27
cg27476456	chr19	14115967	0.304177	5.67065e-06	0.00736406	-0.123709	8.05453e-07	0.00196785	-0.97	RFX1
cg02957197	chr1	26449233	0.886452	5.43478e-08	0.000200114	-0.153407	8.17385e-07	0.00199074	-1.3	PDIK1L;PDIK1L;PDIK1L
cg06466508	chr6	28641622	0.24639	6.79469e-05	0.0415339	-0.112279	8.69674e-07	0.00209582	-1.27
cg16117969	chr2	208323470	0.917197	2.83749e-08	0.000125972	-0.15034	8.66341e-07	0.00209582	-1.33
cg19509405	chr21	15456605	0.936116	1.18545e-07	0.000360287	-0.147289	8.7132e-07	0.00209582	-1.74
cg00751415	chr12	97858620	0.354431	2.14706e-07	0.000575208	0.153494	9.02821e-07	0.00214542	0.92	RMST
cg20152539	chr17	14206871	0.329172	4.56126e-07	0.00103016	0.317941	8.97819e-07	0.00214542	2.05	HS3ST3B1;MGC12916
cg24975649	chr5	3197320	0.655662	3.7537e-06	0.00540119	0.150939	8.99529e-07	0.00214542	1.15
cg27025276	chr12	66028101	0.918013	3.16749e-08	0.000136049	-0.160499	9.02987e-07	0.00214542	-1.43	LOC100507065;LOC100507065;LOC100507065;LOC100507065
cg23378165	chr17	9550256	0.554949	3.19782e-06	0.00481043	0.169732	9.0676e-07	0.00214782	1.08	USP43
cg23421288	chr4	385821	0.911523	3.39303e-08	0.000139379	-0.147905	9.55403e-07	0.00225616	-1.24
cg20568490	chr1	89652416	0.92595	3.33006e-08	0.000137617	-0.208034	9.96962e-07	0.00234007	-1.74	GBP4
cg13344095	chr6	26233352	0.462998	3.70912e-05	0.0277574	0.331818	1.04311e-06	0.00241298	2.49
cg14485566	chr19	42349472	0.91719	1.56005e-08	8.87458e-05	-0.203275	1.06491e-06	0.00244778	-1.73	LYPD4;DMRTC2
cg19041076	chr18	72917390	0.512748	5.56509e-06	0.00727887	0.283952	1.06235e-06	0.00244778	1.87	ZADH2;ZADH2;ZADH2
cg16445268	chr10	94835624	0.483363	1.29615e-06	0.00229388	0.163793	1.09758e-06	0.00250548	0.97	CYP26A1;CYP26A1
cg22132509	chr3	160475102	0.330672	2.11441e-07	0.000568422	0.10451	1.10613e-06	0.00250548	0.64	PPM1L
cg08985785	chr6	39196340	0.55771	0.000129265	0.0630071	0.322569	1.13337e-06	0.00255971	2.46	KCNK5
cg05198960	chr12	133309102	0.871785	4.57519e-08	0.000172552	-0.250265	1.15738e-06	0.00257856	-1.85	ANKLE2
cg18682380	chr19	54975263	0.231202	5.76144e-05	0.0374719	-0.124463	1.15827e-06	0.00257856	-2.05	LENG9
cg05895665	chr7	20818725	0.280241	2.61521e-07	0.000677274	0.249446	1.16889e-06	0.00258729	1.57
cg19267092	chr5	178449976	0.858756	1.51209e-08	8.76698e-05	-0.295001	1.17333e-06	0.00258973	-2.11	ZNF879
cg01353646	chr12	58132733	0.653393	1.41256e-05	0.0143458	0.10564	1.18427e-06	0.00259913	0.91	AGAP2;AGAP2
cg05133205	chr6	32121249	0.523426	7.01394e-06	0.00859511	0.219733	1.19562e-06	0.00261557	1.47	PPT2;PPT2
cg25659817	chr20	8639249	0.799723	0.000626662	0.158126	0.10722	1.2022e-06	0.00261631	1.29	PLCB1;PLCB1
cg03671207	chr6	167544662	0.807444	1.10711e-07	0.000341326	-0.155832	1.23626e-06	0.00265966	-1.09	CCR6;CCR6
cg05759148	chr6	27783336	0.603115	1.99774e-05	0.0183897	0.159594	1.24567e-06	0.00265966	1.17	HIST1H2AJ
cg13930261	chr5	42949882	0.102484	1.3654e-07	0.000401824	0.215554	1.24223e-06	0.00265966	2.06
cg15233611	chr12	122244660	0.426641	2.97318e-06	0.00451159	0.264298	1.24609e-06	0.00265966	1.63	SETD1B
cg16975812	chr15	43618947	0.895396	6.17755e-08	0.000213311	-0.149859	1.24071e-06	0.00265966	-1.27
cg26426142	chr6	26044274	0.0855364	4.72009e-11	1.63526e-06	0.209027	1.22575e-06	0.00265966	2.13	HIST1H2BB;HIST1H3C
cg01508045	chr6	41516162	0.0911429	3.69546e-12	2.20853e-07	0.253555	1.27738e-06	0.00271897	2.48	FOXP4;FOXP4;FOXP4
cg00576435	chr20	36149188	0.717499	6.4528e-06	0.00798494	0.112205	1.29695e-06	0.00275231	0.92	BLCAP;BLCAP;BLCAP;BLCAP;NNAT;NNAT;BLCAP
cg15336210	chr2	145780622	0.369789	1.46953e-07	0.000423635	0.223792	1.30013e-06	0.00275231	1.32	TEX41
cg13990487	chr1	19420096	0.918708	1.71946e-08	9.21305e-05	-0.187783	1.32426e-06	0.00279579	-1.64	UBR4
cg08000731	chr11	316247	0.634425	1.46612e-05	0.0147356	0.163468	1.34111e-06	0.00282369	1.18
cg09012594	chr10	21464258	0.416288	6.23848e-07	0.0013135	0.106536	1.34884e-06	0.00283002	0.62	NEBL
cg15302379	chr10	102821848	0.733801	2.62506e-05	0.0219893	0.129788	1.35483e-06	0.00283002	1.17	KAZALD1;KAZALD1
cg12113345	chr8	92260080	0.841218	2.29091e-07	0.000607461	-0.104199	1.3667e-06	0.0028391	-0.85	SLC26A7;SLC26A7;SLC26A7;SLC26A7
cg01583716	chr16	7855518	0.367815	5.29023e-07	0.00115322	0.175835	1.39062e-06	0.00287342	1.05
cg12465710	chr10	135042885	0.297092	6.85704e-07	0.00140565	0.105977	1.39833e-06	0.00288168	0.69	UTF1
cg20479660	chr20	36149112	0.743502	2.91298e-05	0.0235951	0.132342	1.41312e-06	0.00288917	1.25	BLCAP;BLCAP;BLCAP;BLCAP;NNAT;NNAT;BLCAP
cg27300937	chr1	174918038	0.824491	0.000452063	0.132286	0.102073	1.41881e-06	0.0028932	1.38	LOC101928696;RABGAP1L;RABGAP1L;RABGAP1L;RABGAP1L
cg22797892	chr12	74933819	0.618781	5.23778e-05	0.0352631	0.145348	1.48816e-06	0.0030233	1.22	ATXN7L3B;ATXN7L3B
cg16114141	chr6	139351353	0.0825927	3.91348e-08	0.000155922	0.180183	1.50902e-06	0.00304518	1.56	C6orf115
cg21136508	chr16	80058605	0.877213	9.17937e-08	0.000294555	-0.17328	1.53344e-06	0.00308644	-1.29
cg02549409	chr1	183867046	0.892113	3.10454e-08	0.000134748	-0.19099	1.55984e-06	0.00310465	-1.44	RGL1;RGL1;RGL1;RGL1;RGL1;RGL1;RGL1;RGL1;RGL1;RGL1
cg13890428	chr8	142316216	0.269568	2.0849e-06	0.00336061	0.110842	1.56131e-06	0.00310465	0.77
cg01294327	chr19	2291373	0.579333	0.000152796	0.070957	0.221246	1.58163e-06	0.00312062	2.05	LINGO3
cg19035378	chr6	52907284	0.853351	1.13259e-07	0.000347802	-0.155267	1.57757e-06	0.00312062	-1.18	ICK;ICK
cg00159523	chr10	114713187	0.185723	1.97261e-07	0.000539636	0.279956	1.61241e-06	0.00314929	1.87	TCF7L2;TCF7L2;TCF7L2;TCF7L2;TCF7L2;TCF7L2
cg17866778	chr6	26233442	0.213226	6.24323e-08	0.000214625	0.354944	1.60654e-06	0.00314929	2.45
cg22590761	chr15	74218921	0.43381	2.59266e-06	0.00403599	0.209302	1.61331e-06	0.00314929	1.27	LOXL1;LOXL1
cg09088602	chr16	67563608	0.529269	1.19238e-06	0.0021485	0.110596	1.65267e-06	0.00319403	0.67	LOC100505942;FAM65A;FAM65A;FAM65A;FAM65A
cg15070011	chr10	95518093	0.0741558	2.79412e-08	0.00012476	0.105193	1.68371e-06	0.00323792	1.48	LGI1;LGI1;LGI1;LGI1
cg00128651	chr12	121403968	0.606076	6.45247e-06	0.00798494	0.141108	1.70174e-06	0.00325647	0.94
cg10196151	chr1	88173899	0.894291	4.21478e-08	0.000162914	-0.185697	1.72036e-06	0.00326922	-1.43
cg18449062	chr10	104679468	0.461831	2.80175e-07	0.000707664	0.117016	1.72103e-06	0.00326922	0.69	CNNM2;CNNM2;CNNM2
cg21468929	chr10	119295619	0.257953	0.000788755	0.176549	-0.11253	1.79776e-06	0.00339835	-1.66	EMX2OS
cg07839313	chr19	17514600	0.541002	5.35976e-05	0.0357963	0.203877	1.90572e-06	0.0035421	1.62	BST2
cg07278425	chr7	27137922	0.589098	2.4682e-05	0.0209425	0.25286	1.99218e-06	0.00367206	1.86
cg13708645	chr12	121974305	0.435165	2.36387e-06	0.00372524	0.136076	1.9853e-06	0.00367206	0.8	KDM2B;KDM2B
cg15718164	chr3	17364661	0.188863	0.0180174	0.549725	-0.130456	2.016e-06	0.00370279	-3.23	TBC1D5;TBC1D5
cg01111041	chr6	32121055	0.453331	2.09221e-06	0.0033619	0.149904	2.16039e-06	0.00392585	0.89	PPT2;PRRT1;PPT2
cg24550112	chr1	14027521	0.2854	1.51968e-06	0.00260061	0.267168	2.14798e-06	0.00392585	1.7	PRDM2
cg09174681	chr8	144403126	0.89132	2.1544e-08	0.000105937	-0.161378	2.18062e-06	0.00394913	-1.41	TOP1MT
cg03675645	chr17	15552363	0.911645	3.29877e-08	0.000137617	-0.2157	2.2318e-06	0.00402307	-1.73	TRIM16
cg00022054	chr1	48177261	0.627658	8.32926e-06	0.00980485	0.136487	2.26039e-06	0.00405679	0.93
cg11588624	chr3	46587675	0.607382	5.63851e-07	0.00121014	0.10566	2.26095e-06	0.00405679	0.69	LRRC2
cg00144335	chr4	107176	0.505957	2.45211e-06	0.00383321	0.110868	2.28705e-06	0.00409416	0.67	ZNF718
cg01045969	chr17	73527661	0.870413	1.27331e-05	0.0132966	-0.422502	2.30326e-06	0.0041137	-3.93	LLGL2;LLGL2;LLGL2
cg24620622	chr15	31690382	0.901363	4.1595e-08	0.000161581	-0.188644	2.32715e-06	0.00413757	-1.51	KLF13
cg24859236	chr1	9750213	0.743936	2.31854e-05	0.0202853	0.111006	2.32728e-06	0.00413757	0.99	PIK3CD
cg04552666	chr9	132937763	0.884164	6.79638e-08	0.000228583	-0.187273	2.37596e-06	0.00417633	-1.42	NCS1
cg15445244	chr4	7009272	0.918534	5.57183e-08	0.000202285	-0.186618	2.36588e-06	0.00417633	-1.56	TBC1D14;TBC1D14;TBC1D14;TBC1D14
cg21022792	chr6	29589798	0.904546	2.1501e-08	0.000105937	-0.188225	2.42871e-06	0.00425943	-1.57	GABBR1;GABBR1;GABBR1
cg00660989	chr14	45432516	0.351139	2.93134e-05	0.0236237	0.276834	2.47328e-06	0.00432286	2.25	KLHL28;FAM179B
cg07889413	chr18	72917369	0.644427	1.93438e-05	0.01802	0.232646	2.47601e-06	0.00432286	1.92	ZADH2;ZADH2;ZADH2
cg01753375	chr2	74607600	0.530119	1.05495e-06	0.00197259	0.112433	2.60364e-06	0.00450518	0.68	DCTN1;DCTN1
cg17541779	chr6	158115021	0.915457	6.42806e-08	0.000218084	-0.207089	2.62134e-06	0.00450572	-1.76
cg24164005	chr7	50629418	0.906035	4.38686e-08	0.000167072	-0.193309	2.64761e-06	0.00454083	-1.53	DDC;DDC
cg09298159	chr6	153302566	0.360154	4.09054e-06	0.00575987	0.167731	2.66503e-06	0.00455061	1.04	FBXO5;FBXO5
cg06203364	chr1	2137307	0.587805	5.76195e-06	0.00741158	0.1424	2.75821e-06	0.00469939	0.91	C1orf86
cg03360425	chr9	32251715	0.0865133	1.95861e-08	9.94571e-05	0.290188	2.84046e-06	0.00478703	2.38
cg13211196	chr18	52731326	0.91716	5.51905e-08	0.000202258	-0.167895	2.85222e-06	0.00479645	-1.41
cg05728973	chr9	36987377	0.776442	3.60641e-05	0.0272029	0.100185	2.9101e-06	0.00488321	1.05	PAX5;PAX5;PAX5;PAX5;PAX5;PAX5;PAX5;PAX5;PAX5;PAX5;PAX5;PAX5;PAX5
cg09482093	chr17	19314328	0.734865	4.9918e-05	0.0342299	0.108344	3.02517e-06	0.00502207	0.99	RNF112
cg16750777	chr16	50583441	0.645754	2.47561e-05	0.0209745	0.150632	3.05932e-06	0.00506287	1.1	NKD1
cg19363337	chr12	95609720	0.658533	0.000628236	0.15832	0.151652	3.06278e-06	0.00506287	1.46	FGD6
cg22400703	chr2	68545995	0.586153	1.41725e-05	0.0143746	0.163331	3.2654e-06	0.0053434	1.11	CNRIP1;CNRIP1
cg06768010	chr2	74729502	0.399571	3.62572e-06	0.00528501	0.135326	3.30298e-06	0.00536854	0.8	LOC151534;LBX2
cg22259831	chr17	47210166	0.053505	6.0071e-08	0.000212508	0.176033	3.34409e-06	0.00541272	1.81	B4GALNT2;B4GALNT2;B4GALNT2
cg20046472	chr14	102281504	0.654898	8.27939e-06	0.00977577	-0.113521	3.36545e-06	0.00542469	-0.72	PPP2R5C;PPP2R5C;PPP2R5C;PPP2R5C;PPP2R5C
cg22421148	chr20	36149119	0.755746	5.41609e-05	0.035969	0.112213	3.36356e-06	0.00542469	1.06	BLCAP;BLCAP;BLCAP;BLCAP;NNAT;NNAT;BLCAP
cg17736443	chr6	27783054	0.070129	6.95746e-09	5.60127e-05	0.1853	3.47331e-06	0.00554107	2.01	HIST1H2AJ;HIST1H2BM
cg06531870	chr13	89037260	0.716054	3.09341e-05	0.0244708	0.110096	3.57047e-06	0.0056569	0.91
cg15168577	chr5	139138880	0.473738	2.33882e-05	0.0203501	0.189945	3.57504e-06	0.0056569	1.36
cg17156534	chr20	39658922	0.482276	2.25775e-05	0.0198652	0.173429	3.61893e-06	0.00570311	1.18	TOP1
cg11985480	chr2	74729100	0.763838	3.49418e-05	0.0266671	0.13588	3.68409e-06	0.00579404	1.46	LOC151534;LBX2
cg06952099	chr7	20818657	0.106993	9.56299e-10	1.87519e-05	0.173538	3.78438e-06	0.00588035	1.8
cg10270519	chr7	52787385	0.683544	1.19465e-06	0.0021485	-0.186689	3.77264e-06	0.00588035	-1.16
cg11501059	chr17	38473789	0.300948	3.32678e-07	0.000810238	0.119052	3.78055e-06	0.00588035	0.76	RARA;RARA;RARA
cg09367425	chr11	61733997	0.291089	6.6257e-07	0.00138007	0.24902	3.79218e-06	0.00588071	1.55	FTH1
cg27560367	chr13	114144049	0.510744	1.48465e-06	0.00257469	0.133441	3.85534e-06	0.00596675	0.79	DCUN1D2;TMCO3
cg03696617	chr7	150097762	0.89533	6.59189e-08	0.000222669	-0.244947	3.89231e-06	0.00598818	-1.79
cg06364044	chr8	6655944	0.704224	1.46184e-06	0.00254081	-0.170071	3.88942e-06	0.00598818	-1.08
cg27241808	chr6	114180814	0.0848011	3.32532e-08	0.000137617	0.342084	3.87961e-06	0.00598818	3.12	MARCKS
cg09791504	chr1	151701849	0.584619	5.63748e-06	0.00735156	0.12751	3.9668e-06	0.00609072	0.81	C1orf230
cg20867257	chr2	7273918	0.885382	5.79297e-08	0.000208589	-0.189313	3.99933e-06	0.00612855	-1.41
cg01083652	chr15	71629208	0.837914	1.19868e-07	0.000360963	-0.119224	4.0174e-06	0.00613205	-1	THSD4
cg04056576	chr3	160475090	0.222405	7.17947e-07	0.00146402	0.135984	4.18302e-06	0.00637232	0.98	PPM1L
cg04542537	chr5	126745231	0.92982	3.29105e-08	0.000137617	-0.147735	4.26836e-06	0.00647404	-1.45	MEGF10;MEGF10;MEGF10;MEGF10
cg11758793	chr17	38520139	0.639463	5.79409e-05	0.0375757	0.179033	4.27478e-06	0.00647404	1.34	GJD3;GJD3
cg24799932	chr3	33791269	0.194326	0.00261168	0.299966	-0.180093	4.4438e-06	0.00668045	-3.5
cg12390524	chr3	129078379	0.883853	4.31115e-08	0.000165814	-0.229539	4.45897e-06	0.0066878	-1.68
cg04237141	chr6	26431366	0.916243	4.72988e-08	0.000177525	-0.255275	4.53863e-06	0.00676808	-1.88
cg08565469	chr19	2291389	0.48376	5.37629e-05	0.0358293	0.210317	4.762e-06	0.00704707	1.49	LINGO3
cg00106345	chr7	27138396	0.444881	2.05194e-05	0.0187133	0.331876	4.81981e-06	0.0070839	2.13
cg10886393	chr11	22215701	0.392533	2.41696e-06	0.00378587	0.160486	4.80627e-06	0.0070839	0.96	ANO5;ANO5
cg22167893	chr7	65671551	0.602028	4.1694e-05	0.0302817	0.129834	4.8592e-06	0.00710966	0.92	TPST1
cg04432493	chr7	116312904	0.602397	1.32612e-05	0.0136954	0.134559	5.10569e-06	0.00741075	0.89	MET;MET
cg05344902	chr7	40575355	0.813063	5.1405e-07	0.00113138	-0.157165	5.17535e-06	0.00747371	-0.98	SUGCT;SUGCT;SUGCT;SUGCT
cg13422804	chr9	139582673	0.53482	2.69787e-06	0.00416708	0.101647	5.40213e-06	0.00774288	0.61	AGPAT2;AGPAT2
cg04062767	chr12	130958162	0.580517	9.56934e-06	0.0107577	0.124736	5.6157e-06	0.00799319	0.78	RIMBP2
cg20777186	chr2	112165595	0.778174	6.25925e-06	0.00785616	-0.34916	5.61738e-06	0.00799319	-2.77	MIR4435-2HG
cg05741219	chr2	24295212	0.910988	5.56091e-08	0.000202285	-0.240498	5.92961e-06	0.0083761	-1.88	SF3B14
cg26550627	chr17	65713576	0.165563	0.00684447	0.421733	-0.158348	5.92879e-06	0.0083761	-4.57	NOL11;NOL11
cg05395476	chr16	21166565	0.875494	1.243e-07	0.00037143	-0.155896	6.00336e-06	0.00844955	-1.16	DNAH3
cg22721579	chr1	36787932	0.587311	0.000184987	0.0794476	0.153631	6.13234e-06	0.00858443	1.29	FAM176B
cg06959457	chr10	82363384	0.95309	1.71765e-08	9.21305e-05	-0.282501	6.1946e-06	0.00864046	-2.35	SH2D4B;SH2D4B
cg05512310	chr11	16761290	0.650327	3.53527e-05	0.0269014	0.1074	6.24318e-06	0.00869262	0.81	C11orf58;C11orf58
cg01589135	chr21	27926020	0.912814	1.18866e-07	0.000360287	-0.16898	6.31721e-06	0.00876427	-1.45	CYYR1
cg06843889	chr5	42949542	0.0855505	3.03261e-08	0.000133114	0.272026	6.34735e-06	0.00879039	2.88
cg11700824	chr10	88730823	0.0622471	1.71446e-08	9.21305e-05	0.215263	6.55803e-06	0.00903385	2.06	AGAP11
cg15654792	chr1	44087823	0.756673	0.000194465	0.0814989	0.11873	6.67251e-06	0.00915906	1.17	PTPRF;PTPRF
cg10440923	chr2	54013188	0.15721	0.000197176	0.0822278	-0.10418	6.85713e-06	0.0093829	-2.01	ERLEC1;ERLEC1;ERLEC1;GPR75-ASB3;ASB3;ASB3;ASB3
cg20671920	chr8	10586678	0.272016	1.6109e-06	0.00272668	0.156617	6.85973e-06	0.0093829	1.03	SOX7
cg16501237	chr10	99081016	0.0778092	3.50654e-08	0.000141891	0.274753	6.90652e-06	0.00940326	2.43	FRAT1;FRAT1
cg07211044	chr8	60032983	0.39252	7.66671e-06	0.00924915	0.264242	6.95612e-06	0.00942547	1.66	TOX
cg01340952	chr14	45431885	0.0563341	2.42164e-08	0.00011266	0.144669	7.05682e-06	0.00953498	2.03	KLHL28;FAM179B
cg01999736	chr11	45824141	0.899757	8.96983e-06	0.0102634	-0.238326	7.08392e-06	0.00955498	-1.91	SLC35C1;SLC35C1
cg02360514	chr19	45975990	0.183548	6.15057e-06	0.00776465	0.119846	7.12182e-06	0.00955872	1.02	FOSB;FOSB
cg15437444	chr3	33319500	0.258621	0.000117769	0.0593369	-0.129424	7.25918e-06	0.00969044	-1.4	FBXL2;FBXL2
cg08067872	chr6	137567914	0.300263	0.000114772	0.0583086	-0.13962	7.27289e-06	0.00969208	-1.16
cg01235820	chr20	642782	0.606815	1.08509e-05	0.0117742	0.128661	7.41747e-06	0.00983481	0.84	SCRT2
cg25064130	chr2	179372221	0.786775	0.0012583	0.221385	0.135935	7.43063e-06	0.00983481	1.62	MIR548N
cg26209990	chr7	127911258	0.623726	6.12228e-05	0.0389272	0.212924	7.4138e-06	0.00983481	1.6
cg13279476	chr3	15372965	0.328819	1.03029e-05	0.0113379	0.103774	7.44368e-06	0.00983533	0.63	SH3BP5;SH3BP5
cg22455082	chr4	39702470	0.549155	7.05563e-06	0.00862435	0.126446	7.47033e-06	0.00985378	0.78	UBE2K;UBE2K;UBE2K
cg05405872	chr11	16761533	0.662293	0.000641051	0.159887	0.131246	7.532e-06	0.0099183	1.31	C11orf58;C11orf58
cg13442749	chr9	96337681	0.493841	1.76313e-05	0.0168905	0.146283	7.55128e-06	0.00992686	0.91	PHF2
cg09779576	chr15	25442386	0.754929	0.00027287	0.0999998	0.11438	7.5754e-06	0.00994174	1.22
cg20331390	chr19	36716187	0.573262	4.17047e-05	0.0302817	-0.280634	7.94285e-06	0.0102679	-1.85	ZNF146;ZNF146;ZNF146
cg05755408	chr8	27157515	0.447523	0.0120649	0.497586	-0.142539	8.0225e-06	0.0103536	-1.43	TRIM35
cg09463917	chr22	20784958	0.0343098	2.31153e-07	0.000608774	0.113462	8.09992e-06	0.0104205	2.58	SCARF2;SCARF2
cg18678782	chr8	105361477	0.635919	0.000185958	0.0796007	0.195892	8.21845e-06	0.0104961	1.51	DCSTAMP;DCSTAMP
cg14675124	chr3	153324826	0.786238	0.00225742	0.283416	0.101691	8.24681e-06	0.0105035	1.43
cg18545771	chr11	63827879	0.453255	6.44787e-06	0.00798494	0.142409	8.32064e-06	0.0105802	0.83	MACROD1
cg24010336	chr19	39467258	0.780787	0.00244766	0.292585	0.137275	8.42706e-06	0.0106806	1.63	FBXO17
cg08698721	chr14	101294147	0.577957	1.97291e-05	0.0182259	0.128314	8.61606e-06	0.0108493	0.86	MEG3;MEG3;MEG3
cg19673337	chr8	80678683	0.268602	6.38458e-06	0.00796571	0.118448	8.69366e-06	0.0109057	0.81	HEY1;HEY1;HEY1;HEY1
cg12464007	chr17	20210929	0.861901	3.63667e-07	0.000864042	-0.157508	8.8682e-06	0.0110949	-1.18	SPECC1;SPECC1;SPECC1
cg20544307	chr16	8961293	0.298963	5.27239e-06	0.00696641	0.257228	8.95696e-06	0.0111396	1.66	CARHSP1;CARHSP1;CARHSP1;CARHSP1;CARHSP1;CARHSP1
cg22851879	chr2	30565225	0.895601	8.99425e-08	0.000292379	-0.236616	8.96129e-06	0.0111396	-1.82
cg12534199	chr3	109117978	0.512961	0.000166018	0.0747731	-0.4281	8.99975e-06	0.0111695	-3.51
cg08738340	chr16	82685721	0.711421	9.54002e-05	0.0517353	0.109067	9.19354e-06	0.011322	0.9	CDH13;CDH13;CDH13;CDH13;CDH13;CDH13
cg22723791	chr17	40934600	0.541203	1.16686e-05	0.0124121	0.127616	9.19208e-06	0.011322	0.77	WNK4
cg21869609	chr19	2291613	0.629284	0.00184914	0.262114	0.18746	9.22499e-06	0.0113225	2.46	LINGO3
cg01311051	chr16	30064897	0.202534	0.00341918	0.334002	-0.102121	9.30764e-06	0.0114059	-2.14	ALDOA
cg03533472	chr16	46919112	0.505554	2.6606e-05	0.0222076	0.105389	9.43039e-06	0.0115381	0.67	GPT2;GPT2;GPT2
cg25083618	chr10	94820988	0.584824	2.56363e-05	0.0215751	0.152857	9.57278e-06	0.011639	1	CYP26C1
cg27159561	chr10	88798423	0.8981	1.03209e-07	0.000322031	-0.19528	9.71493e-06	0.0117566	-1.49
cg14182974	chr9	4791918	0.241386	5.8801e-05	0.037912	-0.141919	9.77505e-06	0.011811	-1.47	RCL1
cg21148115	chr3	101833291	0.251881	2.56594e-05	0.0215751	-0.108327	9.99568e-06	0.0120029	-0.98
cg10222078	chr10	118894615	0.578307	1.13783e-05	0.0121932	0.111274	1.00253e-05	0.0120199	0.69	VAX1;VAX1
cg00690609	chr10	72218900	0.219927	7.13419e-07	0.00145861	0.177358	1.0149e-05	0.0121369	1.28
cg20890313	chr7	26904699	0.0623316	1.18961e-07	0.000360287	0.13559	1.05451e-05	0.0124963	1.48	SKAP2
cg17510987	chr19	1883657	0.764492	0.000122806	0.0608874	0.109601	1.05675e-05	0.0124964	1.07	FAM108A1;FAM108A1
cg21699330	chr7	26193032	0.301419	3.23708e-06	0.00484579	0.313109	1.07491e-05	0.0126919	2.03	NFE2L3
cg21286967	chr6	31696710	0.540233	2.35133e-05	0.0203885	0.138319	1.08932e-05	0.012823	0.87	DDAH2
cg14388195	chr17	1546961	0.0306758	3.29058e-08	0.000137617	0.185676	1.09484e-05	0.0128678	2.58	SCARF1;SCARF1;SCARF1;SCARF1;SCARF1
cg25851313	chr1	16400665	0.202434	1.14683e-06	0.00210639	0.259111	1.09809e-05	0.0128678	1.8	FAM131C
cg07225966	chr10	94820376	0.445156	2.10342e-05	0.0190244	0.139871	1.10999e-05	0.0129681	0.84	CYP26C1
cg15127250	chr12	51786489	0.509945	9.21288e-05	0.0505488	0.268069	1.10859e-05	0.0129681	1.75	GALNT6
cg23893997	chr7	26904682	0.0581909	9.62153e-08	0.00030387	0.121673	1.11647e-05	0.0130195	1.55	SKAP2
cg10121097	chr12	11224369	0.768139	9.91892e-05	0.0531099	-0.736956	1.13444e-05	0.0131942	-7	PRH1-PRR4;PRH1;PRH1
cg15283852	chr17	9550296	0.258365	8.59675e-07	0.00169639	0.241838	1.15462e-05	0.0133292	1.57	USP43
cg17486446	chr11	2986575	0.904458	7.73381e-08	0.000255684	-0.151208	1.20298e-05	0.013785	-1.6	SNORA54;NAP1L4
cg17485838	chr7	27138712	0.582285	4.27884e-05	0.030724	0.219724	1.21324e-05	0.0138414	1.5
cg27025793	chr13	49975730	0.346498	0.000138805	0.0660825	-0.119015	1.22298e-05	0.013932	-0.91	CAB39L;CAB39L;CAB39L;CAB39L;CAB39L;CAB39L
cg03576224	chr16	82691552	0.492627	2.00928e-05	0.0184741	0.150779	1.24469e-05	0.0140966	0.91	CDH13;CDH13;CDH13;CDH13;CDH13;CDH13
cg11489251	chr6	31508297	0.387702	8.43999e-06	0.00983093	0.179301	1.25373e-05	0.0141784	1.08	BAT1;BAT1
cg03903701	chr5	110563123	0.665117	2.57236e-05	0.0215823	0.116314	1.26191e-05	0.0142294	0.87	CAMK4
cg11923916	chr17	9550261	0.559573	3.21214e-05	0.0252523	0.175024	1.26917e-05	0.0142698	1.13	USP43;USP43
cg02162324	chr16	67196462	0.288962	1.99401e-06	0.00325214	0.108507	1.27696e-05	0.0143161	0.72	HSF4;FBXL8;HSF4
cg23896972	chr12	122079102	0.468505	3.44572e-06	0.00507982	0.129029	1.28586e-05	0.0143646	0.75	ORAI1
cg25050332	chr11	316088	0.688447	0.000195655	0.0818228	0.167663	1.28683e-05	0.0143646	1.38
cg14875662	chr1	17797208	0.916595	2.4778e-07	0.000645994	-0.114248	1.29007e-05	0.01438	-1.15
cg16036430	chr11	125010387	0.461337	1.02307e-05	0.0113379	0.121832	1.32002e-05	0.0146718	0.71
cg09908758	chr7	657983	0.639547	4.60429e-06	0.0063313	-0.144125	1.33129e-05	0.0147759	-0.86	PRKAR1B;PRKAR1B;PRKAR1B;PRKAR1B;PRKAR1B;PRKAR1B
cg19529471	chr13	35517634	0.432254	2.05697e-05	0.0187133	0.199808	1.33441e-05	0.0147893	1.22	NBEA
cg26419469	chr8	93089634	0.509296	3.49021e-05	0.026663	0.202552	1.34422e-05	0.0148346	1.24	RUNX1T1;RUNX1T1;RUNX1T1;RUNX1T1;RUNX1T1;RUNX1T1;RUNX1T1;RUNX1T1;RUNX1T1;RUNX1T1;RUNX1T1;RUNX1T1;RUNX1T1
cg23800304	chr2	134987675	0.922379	1.48314e-07	0.000423635	-0.141572	1.35753e-05	0.0149602	-1.38
cg24635834	chr5	42949919	0.0554761	2.71719e-07	0.000696717	0.184208	1.36187e-05	0.0149868	2.74
cg17473341	chr12	95940370	0.687984	3.38648e-05	0.0261873	0.100577	1.3648e-05	0.0149978	0.84	USP44;USP44;USP44
cg10829769	chr11	103767328	0.886356	5.10544e-07	0.00113138	-0.109587	1.3723e-05	0.0150166	-0.96
cg26264232	chr7	27138751	0.15697	3.41881e-06	0.00504973	0.229916	1.38706e-05	0.0151142	1.96
cg25123362	chr10	133793734	0.779787	0.000495049	0.139152	0.125921	1.39919e-05	0.0151784	1.43	BNIP3
cg14863643	chr12	132318393	0.638465	2.87605e-05	0.0233244	0.115577	1.41302e-05	0.0152686	0.78	MMP17
cg17186803	chr11	118023038	0.458063	1.23926e-05	0.0129759	0.150152	1.42184e-05	0.0152928	0.88	SCN4B;SCN4B
cg19557035	chr7	27138360	0.387615	1.51975e-05	0.0151765	0.181476	1.4586e-05	0.0156091	1.08	HOTAIRM1;HOTAIRM1
cg02929961	chr8	22525659	0.778065	1.07309e-06	0.00199453	-0.177592	1.46582e-05	0.0156433	-1.22	BIN3
cg25542319	chr5	112540429	0.776591	4.46262e-07	0.00102275	-0.235754	1.47454e-05	0.015712	-1.58	MCC;MCC
cg22041803	chr7	26137796	0.795727	2.21228e-05	0.0196173	-0.221095	1.48553e-05	0.0157885	-1.52
cg21096966	chr14	45432458	0.533576	0.00049816	0.139604	0.193477	1.50931e-05	0.0159757	1.73	KLHL28;FAM179B
cg14970186	chr8	57701690	0.871135	3.12225e-07	0.000775	-0.112393	1.52113e-05	0.0160571	-0.84
cg14148108	chr21	45744314	0.897146	8.38667e-08	0.000274928	-0.19562	1.59747e-05	0.0166593	-1.47	PFKL;PFKL
cg18805066	chr7	27134259	0.279206	4.61993e-06	0.00634158	0.276054	1.60229e-05	0.0166669	1.76	HOXA1;HOXA1
cg04381325	chr14	55165603	0.741217	0.00122778	0.219065	0.111678	1.63714e-05	0.0169592	1.12	SAMD4A;SAMD4A
cg22251148	chr11	16631866	0.779663	0.000143892	0.0677532	0.111498	1.65888e-05	0.0171386	1.2
cg12873476	chr8	142402728	0.829038	0.00415607	0.358136	0.128227	1.66505e-05	0.0171795	2.08
cg02028734	chr17	156528	0.864153	5.51904e-07	0.00118778	-0.190087	1.67462e-05	0.0172325	-1.5	RPH3AL;RPH3AL;RPH3AL;RPH3AL
cg16704889	chr6	31696729	0.701696	0.000316233	0.108838	0.129573	1.67788e-05	0.0172432	1.12	DDAH2
cg19905587	chr2	85554135	0.100669	1.18556e-06	0.00214207	0.137185	1.68705e-05	0.0173145	1.42	TGOLN2
cg04028167	chr12	76107548	0.841567	1.19829e-06	0.00215007	-0.129176	1.69938e-05	0.0173448	-0.9
cg05170070	chr17	9550108	0.655652	8.05529e-05	0.0463925	0.153824	1.69812e-05	0.0173448	1.12	USP43;USP43
cg07824824	chr18	12254976	0.503136	3.37677e-05	0.0261826	0.195789	1.70116e-05	0.0173448	1.2	CIDEA;CIDEA
cg10705379	chr10	99080932	0.0581779	6.13954e-08	0.000213085	0.1512	1.69709e-05	0.0173448	1.66	FRAT1;FRAT1
cg11007670	chr4	108300253	0.890185	2.72965e-07	0.000697608	-0.132713	1.71363e-05	0.0174034	-1.08
cg24147428	chr11	65409760	0.544821	0.00019899	0.0826411	0.199954	1.72152e-05	0.0174607	1.42	SIPA1;SIPA1
cg08857351	chr12	117627450	0.157039	5.72586e-07	0.00121878	0.115165	1.73045e-05	0.0175284	1.03	FBXO21;FBXO21
cg01394847	chr16	73101069	0.768431	0.000308625	0.107814	0.113868	1.73955e-05	0.0175519	1.17
cg03755425	chr2	73140918	0.0761551	9.05279e-08	0.000292718	0.125895	1.73812e-05	0.0175519	1.4
cg15032216	chr1	20577301	0.830393	6.59822e-07	0.00137804	-0.165391	1.73914e-05	0.0175519	-1.1
cg20481636	chr14	36683445	0.891543	2.66038e-07	0.000686682	-0.192028	1.7444e-05	0.0175781	-1.58
cg05857643	chr7	26242932	0.137065	4.23314e-07	0.000978819	0.124085	1.75108e-05	0.0176225	1.12	CBX3;CBX3
cg27539214	chr16	67997921	0.788114	5.13002e-06	0.00681305	-0.213464	1.82202e-05	0.0182419	-1.56	SLC12A4;SLC12A4;SLC12A4;SLC12A4;SLC12A4
cg17253051	chr7	24960922	0.325155	1.25756e-06	0.00223871	0.192788	1.84831e-05	0.0184338	1.17	OSBPL3
cg14282850	chr10	123924917	0.390992	8.54694e-06	0.00986674	0.112529	1.86949e-05	0.0186212	0.66	TACC2;TACC2;TACC2;TACC2
cg11177833	chr17	4692377	0.392846	2.1126e-05	0.0190852	0.114308	1.87982e-05	0.0187001	0.68	GLTPD2
cg00424451	chr17	76338660	0.605206	6.3359e-05	0.0396019	0.149202	1.88897e-05	0.0187671	0.99
cg03959515	chr8	127569677	0.122516	1.44227e-06	0.00251241	0.118139	1.91361e-05	0.0189634	1.08	FAM84B
cg17452615	chr12	122019080	0.237171	8.37597e-07	0.00166688	0.231747	1.9179e-05	0.0189817	1.53	KDM2B;KDM2B
cg08670136	chr17	45810379	0.49409	6.81409e-06	0.00837663	0.109837	1.94917e-05	0.0192178	0.64	TBX21
cg17283687	chr10	46031696	0.776805	0.00710356	0.426897	0.128991	1.97643e-05	0.0194618	1.46	MARCH8;MARCH8;MARCH8
cg18446578	chr5	115908322	0.138266	3.65017e-08	0.000146938	0.169579	1.98371e-05	0.0195087	1.54	SEMA6A
cg07793207	chr10	95517529	0.20973	1.35419e-06	0.00238032	0.150841	2.00056e-05	0.0196248	1.12	LGI1
cg14200846	chr18	76744969	0.322481	8.48728e-06	0.00984175	0.109904	2.01987e-05	0.0197643	0.69	SALL3
cg14916924	chr9	129433969	0.549961	9.20109e-05	0.0505488	0.203876	2.02549e-05	0.0197943	1.32	LMX1B
cg25637388	chr3	33620962	0.795734	0.00442472	0.366245	0.109374	2.08429e-05	0.0202606	1.36	CLASP2;CLASP2
cg27275553	chr7	101959150	0.895444	3.37152e-07	0.000818567	-0.184292	2.08885e-05	0.0202606	-1.49	SH2B2
cg08947908	chr7	43836762	0.859692	1.03157e-06	0.00194831	-0.139623	2.12177e-05	0.0205287	-1.06	BLVRA;BLVRA
cg25540816	chr5	148928885	0.283636	3.73347e-06	0.00539885	0.294074	2.12611e-05	0.0205451	1.92	CSNK1A1;CSNK1A1
cg07208667	chr8	41425365	0.660071	7.35523e-05	0.0438898	0.116005	2.13701e-05	0.0206248	0.82
cg15726169	chr6	53661064	0.484738	2.62652e-05	0.0219893	0.116461	2.14597e-05	0.0206344	0.69	LRRC1
cg13416486	chr16	73093652	0.692265	7.40939e-05	0.0440647	0.10443	2.16917e-05	0.0208317	0.79	ZFHX3
cg05194618	chr14	45432309	0.17196	1.58519e-07	0.000446222	0.398423	2.20529e-05	0.0211263	2.98	KLHL28;FAM179B
cg05467312	chr14	89086580	0.724317	0.00188065	0.263789	0.140038	2.22665e-05	0.0213047	1.23	EML5
cg01453052	chr17	73892097	0.351564	1.88598e-05	0.0176751	0.22771	2.23489e-05	0.0213089	1.41	TRIM65
cg25860598	chr4	146099474	0.550631	0.000171381	0.0758257	0.156601	2.24395e-05	0.021365	1.13	OTUD4
cg12323347	chr10	112256517	0.27954	3.4864e-06	0.00512035	0.11092	2.25179e-05	0.0214127	0.74	DUSP5
cg08229763	chr17	70054759	0.885422	2.07994e-07	0.000561096	-0.163365	2.2801e-05	0.0215595	-1.19	LOC102723517
cg18589875	chr6	19042773	0.888635	0.000372638	0.119764	-0.43256	2.27581e-05	0.0215595	-4.76
cg19312513	chr2	129059360	0.925479	5.79918e-08	0.000208589	-0.190868	2.2971e-05	0.0216324	-1.64	HS6ST1
cg24257776	chr3	47051546	0.336939	0.000416462	0.126836	-0.15562	2.32633e-05	0.0218547	-1.28	LOC100129354
cg24829409	chr8	58192753	0.539736	0.000875697	0.186551	-0.25718	2.32926e-05	0.0218558	-2.11	C8orf71
cg16720981	chr10	50385616	0.384947	8.45586e-06	0.00983176	0.128075	2.3452e-05	0.0219524	0.77	C10orf128;C10orf128;C10orf128;C10orf128;C10orf128
cg09840667	chr11	68517784	0.48753	0.000100405	0.0535758	0.150529	2.36473e-05	0.0221085	1	MTL5;MTL5
cg01416891	chr10	94820892	0.217897	1.47184e-05	0.014755	0.134089	2.36877e-05	0.0221196	0.98	CYP26C1
cg04159903	chr5	42949799	0.0637735	1.88839e-06	0.00313055	0.159881	2.3825e-05	0.0222211	2.34
cg00095431	chr2	67775781	0.913089	7.16759e-08	0.000238999	-0.198983	2.45569e-05	0.0227671	-1.49
cg01274122	chr8	8749938	0.557903	0.00032733	0.111004	0.248172	2.49621e-05	0.0230055	1.77	MFHAS1
cg00582628	chr8	54764515	0.693335	0.000311632	0.108184	0.124835	2.54928e-05	0.023439	1.02	RGS20
cg06098236	chr10	122837121	0.587383	3.46839e-05	0.0265485	0.106005	2.57274e-05	0.0236268	0.66
cg07263393	chr3	128205274	0.311463	1.05171e-05	0.0115085	0.161054	2.58643e-05	0.0236686	0.98	GATA2;GATA2;GATA2
cg12453228	chr6	41338345	0.60322	4.55231e-05	0.0319835	0.128921	2.58134e-05	0.0236686	0.84
cg20185005	chr22	44722010	0.125409	8.60287e-07	0.00169639	0.107022	2.5947e-05	0.0236884	1.09
cg25233900	chr10	133793646	0.71811	0.000248589	0.0942648	0.131657	2.59166e-05	0.0236884	1.14	BNIP3
cg02099919	chr5	72679749	0.626754	7.5401e-05	0.0445143	0.129478	2.60723e-05	0.0237749	0.87
cg16173308	chr19	12832346	0.339986	1.07869e-05	0.0117212	0.216285	2.63118e-05	0.0239651	1.31	TNPO2;TNPO2;TNPO2
cg06639923	chr7	5534978	0.822732	4.16176e-07	0.000965185	-0.156853	2.64172e-05	0.0240329	-0.88	FBXL18
cg15043384	chr3	149374761	0.725858	0.000479625	0.137098	0.10965	2.65428e-05	0.0240908	1	WWTR1;WWTR1;WWTR1
cg01717376	chr2	219574845	0.67159	0.000114827	0.0583086	0.110109	2.66737e-05	0.0241532	0.8	TTLL4
cg03024660	chr16	84650415	0.131604	2.76118e-08	0.000124002	0.211082	2.69833e-05	0.0242987	1.92	COTL1
cg20275928	chr17	79283959	0.778474	0.00200299	0.270544	0.15962	2.69908e-05	0.0242987	1.98	C17orf55
cg01357135	chr3	160475128	0.206043	7.54534e-06	0.00914533	0.147806	2.72126e-05	0.0244418	1.13	PPM1L
cg16889875	chr14	97584592	0.69377	0.000409805	0.125399	0.136989	2.71906e-05	0.0244418	1.09
cg20701556	chr1	95698924	0.75568	0.00044988	0.131846	0.142423	2.72505e-05	0.0244476	1.45	RWDD3;RWDD3
cg14403790	chr2	42891267	0.305445	0.00137847	0.231514	-0.161771	2.76702e-05	0.0247648	-1.43	MTA3;MTA3;MTA3
cg26438105	chr18	5892119	0.582328	0.00030794	0.107623	0.205287	2.76998e-05	0.0247648	1.44	TMEM200C
cg17970043	chr11	76368527	0.48531	6.83742e-05	0.0417622	0.340683	2.8101e-05	0.024998	2.27
cg20823695	chr1	2345410	0.576665	0.000169855	0.07569	0.173217	2.83005e-05	0.0250856	1.14	PEX10;PEX10
cg05708452	chr8	86377153	0.563361	4.81471e-05	0.0333988	0.145713	2.86285e-05	0.0251893	0.91	CA3-AS1;CA3-AS1;CA2;CA2
cg09132388	chr7	150217030	0.72999	3.05341e-06	0.00461531	-0.105949	2.90137e-05	0.0254418	-0.58	GIMAP7
cg15013527	chr11	316339	0.588781	8.79627e-05	0.0492011	0.139167	2.91487e-05	0.0255314	0.91
cg18751141	chr7	27138173	0.519112	6.95238e-05	0.0421832	0.199052	2.9966e-05	0.0259546	1.23
cg25571940	chr15	25591385	0.851218	2.2414e-06	0.00354663	-0.120513	2.99581e-05	0.0259546	-0.92	UBE3A;UBE3A;UBE3A
cg03162823	chr12	95941571	0.603701	4.88423e-05	0.0337005	0.107219	3.05044e-05	0.0262745	0.72	USP44;USP44
cg11200656	chr17	75956447	0.601785	3.67892e-05	0.0276426	0.111956	3.07603e-05	0.0264042	0.72
cg03785755	chr6	26196794	0.583753	8.26603e-05	0.0471865	0.12935	3.11293e-05	0.0264897	0.86
cg22244330	chr2	183107582	0.783475	5.16857e-05	0.0349182	-0.505809	3.11223e-05	0.0264897	-4.6	PDE1A;PDE1A;PDE1A;PDE1A;PDE1A
cg25018596	chr12	122057755	0.745112	1.02024e-06	0.00194754	-0.159234	3.13131e-05	0.0265364	-1.06
cg25107972	chr1	246783166	0.895838	2.46657e-07	0.00064523	-0.120856	3.13621e-05	0.0265364	-1.22	CNST;CNST
cg00378510	chr19	2291020	0.268166	1.05689e-05	0.0115164	0.347787	3.15822e-05	0.0266176	2.42	LINGO3
cg18180846	chr10	102990855	0.682243	8.83855e-05	0.0493143	0.104703	3.1588e-05	0.0266176	0.79	FLJ41350
cg25859099	chr7	20818767	0.275987	3.1498e-06	0.00475176	0.15346	3.17066e-05	0.026628	1
cg05472974	chr2	71205399	0.167149	9.32299e-06	0.0105433	0.101444	3.20634e-05	0.0268436	0.88	ANKRD53;ANKRD53
cg06119871	chr3	136617564	0.721486	8.52941e-06	0.00986674	-0.248122	3.23764e-05	0.0270352	-1.57	NCK1;NCK1
cg27267310	chr11	16946393	0.46886	2.19932e-05	0.0195728	0.104364	3.26227e-05	0.0271363	0.61	PLEKHA7
cg21644740	chr6	29599248	0.632117	0.000761081	0.17372	0.171373	3.30007e-05	0.0273921	1.48	GABBR1;GABBR1
cg08733172	chr4	174431860	0.551601	3.42541e-05	0.0264494	0.104173	3.34543e-05	0.0275918	0.63
cg13552742	chr14	77229061	0.35298	1.44676e-05	0.0145978	0.118271	3.36063e-05	0.0276837	0.72	VASH1;VASH1
cg01362541	chr20	55838142	0.631565	0.000637987	0.159593	0.182514	3.41588e-05	0.0279062	1.35	BMP7
cg03756814	chr2	148416907	0.710393	9.06494e-06	0.0103418	-0.129475	3.41114e-05	0.0279062	-0.78
cg20441661	chr10	37893285	0.466221	5.73174e-05	0.0374719	0.211606	3.41295e-05	0.0279062	1.28	MTRNR2L7
cg06023345	chr8	127568650	0.0603967	3.78762e-08	0.000151685	0.139476	3.42206e-05	0.0279273	1.95	FAM84B
cg25181655	chr5	178422888	0.355682	1.20234e-05	0.0127092	0.137472	3.44426e-05	0.028079	0.83	GRM6
cg22548011	chr3	181839434	0.614706	8.8419e-05	0.0493143	0.132059	3.45716e-05	0.0281028	0.88
cg26537280	chr1	95699037	0.437299	3.29617e-05	0.0257116	0.175268	3.45965e-05	0.0281028	1.03	RWDD3;RWDD3
cg18557185	chr7	27128169	0.27399	8.54025e-06	0.00986674	0.150062	3.49706e-05	0.0282874	0.99
cg22025478	chr16	87525515	0.494998	0.000589271	0.152656	0.29056	3.49895e-05	0.0282874	2.11	ZCCHC14
cg10880928	chr9	139715701	0.452721	6.32026e-05	0.0395806	0.175582	3.53551e-05	0.0285532	1.1	C9orf86;C9orf86
cg19350216	chr7	157371224	0.654348	0.000138123	0.0659159	0.114047	3.56832e-05	0.0287286	0.81	PTPRN2;PTPRN2;PTPRN2
cg26077129	chr6	67069084	0.786017	1.6467e-05	0.016174	-0.310009	3.58576e-05	0.0288392	-2.13
cg04369416	chr12	54366207	0.37459	5.34464e-05	0.0357348	0.108698	3.61529e-05	0.0290145	0.65	HOXC11;HOTAIR
cg23931420	chr10	132364083	0.851771	2.38966e-06	0.00375827	-0.112911	3.62126e-05	0.0290145	-1.03
cg10584271	chr3	52814643	0.757187	7.74019e-06	0.00929206	-0.129771	3.64378e-05	0.029095	-0.81	ITIH1;ITIH1;ITIH1;ITIH1
cg10336014	chr9	111663255	0.410308	0.000109073	0.0564192	0.212534	3.72501e-05	0.0296521	1.36	IKBKAP
cg00337187	chr6	3054716	0.566693	7.4326e-05	0.0440807	0.143802	3.78225e-05	0.0299848	0.9
cg04844534	chr11	13073904	0.695076	1.63461e-05	0.0161163	-0.18783	3.78609e-05	0.0299848	-1.15
cg16406078	chr20	825634	0.268088	1.29987e-05	0.0134653	0.108907	3.80957e-05	0.03014	0.74	FAM110A;FAM110A;FAM110A
cg11598635	chr12	51786802	0.663415	0.000662598	0.162642	0.180078	3.83581e-05	0.0303167	1.42	SLC4A8;SLC4A8
cg19628497	chr14	101194267	0.586798	0.000671653	0.163416	0.228954	3.92361e-05	0.0309477	1.67	DLK1
cg08884932	chr1	1196725	0.49607	5.4115e-05	0.035969	-0.131528	3.95538e-05	0.0311035	-0.8	UBE2J2;UBE2J2;LOC100128842;UBE2J2;UBE2J2
cg16693517	chr21	43540480	0.803944	4.14936e-05	0.0302334	-0.124664	3.97279e-05	0.0312089	-1	UMODL1;UMODL1;UMODL1;UMODL1
cg01636080	chr1	27757498	0.176367	0.00365379	0.343172	-0.104443	3.98907e-05	0.0313051	-1.56	WASF2;WASF2
cg27630863	chr18	45428160	0.241389	0.000134642	0.0649732	-0.102137	4.00435e-05	0.0313933	-0.93	SMAD2;SMAD2;SMAD2
cg15331332	chr6	29692111	0.662015	0.000306931	0.107367	0.15214	4.00868e-05	0.0313955	1.13	HLA-F;HLA-F;HLA-F
cg00516481	chr21	44073202	0.406175	4.51408e-05	0.0318827	0.118041	4.01393e-05	0.031405	0.7	PDE9A;PDE9A;PDE9A;PDE9A;PDE9A;PDE9A;PDE9A;PDE9A;PDE9A;PDE9A;PDE9A;PDE9A;PDE9A;PDE9A;PDE9A;PDE9A;PDE9A;PDE9A;PDE9A;PDE9A
cg16056964	chr11	74430117	0.907726	3.89038e-05	0.0287313	-0.205911	4.07959e-05	0.0317083	-1.73	CHRDL2
cg17478893	chr8	1431021	0.761456	6.28945e-06	0.00787216	-0.158593	4.09218e-05	0.0317613	-1.08
cg01735398	chr17	18907305	0.23969	1.60591e-06	0.00272417	0.174119	4.13577e-05	0.0319085	1.18	SLC5A10;FAM83G;SLC5A10
cg22755399	chr12	113527500	0.577763	0.000145458	0.0683252	0.108338	4.15605e-05	0.0320245	0.76	DTX1
cg23389194	chr16	47892451	0.605805	0.000122178	0.0608483	0.117565	4.1708e-05	0.0320265	0.8	LOC101927132;LOC100507534
cg09665391	chr9	115819108	0.0531186	2.42588e-07	0.000636732	0.117906	4.18995e-05	0.0321033	1.48	ZFP37;ZFP37;ZFP37
cg18673409	chr17	74448160	0.489678	5.75429e-05	0.0374719	0.135632	4.21109e-05	0.0322017	0.82	AANAT;UBE2O
cg21154795	chr12	110047146	0.644606	0.000634614	0.159253	0.12652	4.20872e-05	0.0322017	1.07
cg18244817	chr5	42949610	0.0653603	1.53778e-07	0.00043735	0.20862	4.25365e-05	0.0323679	2.76
cg13502125	chr1	147826191	0.578688	0.000225816	0.0887521	0.203209	4.28715e-05	0.032559	1.37
cg25360385	chr12	51786547	0.734492	0.00144363	0.235876	0.15762	4.34303e-05	0.032863	1.51	GALNT6
cg17118836	chr8	94508434	0.435011	9.61842e-05	0.0518943	-0.134437	4.34858e-05	0.032865	-0.84
cg04841825	chr7	845256	0.685559	8.58954e-05	0.0483581	0.103824	4.3732e-05	0.0329025	0.76
cg11111474	chr11	78810854	0.312539	1.92542e-05	0.0179796	0.126188	4.37185e-05	0.0329025	0.8	TENM4
cg12075107	chr12	54432430	0.491907	4.69607e-05	0.0326926	0.138274	4.37121e-05	0.0329025	0.82	HOXC4
cg14130039	chr6	32121225	0.300715	1.37336e-05	0.0140394	0.120236	4.39763e-05	0.0330428	0.77	PPT2;PPT2
cg09113474	chr6	1601369	0.652266	0.000313751	0.108549	0.154194	4.40977e-05	0.03307	1.13
cg12436851	chr16	87525542	0.626612	0.000769322	0.174716	0.167883	4.42156e-05	0.0331265	1.35	ZCCHC14
cg22858394	chr2	237069779	0.297552	1.41099e-05	0.0143458	0.135352	4.46806e-05	0.0333783	0.86
cg12666165	chr10	135051581	0.575051	7.20507e-05	0.0432469	0.117734	4.67717e-05	0.0346407	0.73	VENTX
cg14687339	chr9	132955267	0.564362	3.87427e-05	0.0286942	0.103185	4.7289e-05	0.0348907	0.63	NCS1
cg16674433	chr17	19314408	0.716398	0.000227169	0.089138	0.107749	4.74794e-05	0.0349645	0.87	RNF112
cg17881200	chr7	27138850	0.479063	0.000101028	0.0536506	0.190548	4.77624e-05	0.0350404	1.15
cg10659365	chr19	36598147	0.668156	1.10753e-05	0.0119725	-0.222338	4.8043e-05	0.0352051	-1.38
cg18414021	chr14	100069535	0.442731	0.000162611	0.0737517	0.123034	4.84584e-05	0.0354172	0.76	CCDC85C
cg01947523	chr1	235098925	0.243728	7.7338e-05	0.04506	-0.104422	4.86802e-05	0.0355459	-0.99	LOC101927851
cg19987768	chr17	750306	0.101675	5.88627e-05	0.0379203	0.109325	4.9558e-05	0.0360513	1.2	NXN
cg26416227	chr16	67998086	0.799576	2.77844e-05	0.0227945	-0.21271	4.98246e-05	0.0362113	-1.6	SLC12A4;SLC12A4;SLC12A4;SLC12A4;SLC12A4
cg11416874	chr5	148929352	0.129718	1.09126e-06	0.00201863	0.141961	5.06351e-05	0.0364752	1.09	CSNK1A1;CSNK1A1
cg12666336	chr11	65409412	0.592122	0.000842869	0.183142	0.157636	5.04774e-05	0.0364752	1.2	SIPA1;SIPA1
cg24541378	chr10	2359922	0.76406	8.08916e-06	0.00958027	-0.137147	5.07288e-05	0.036493	-0.97
cg16205352	chr12	49688176	0.694851	0.000105177	0.0551008	0.100604	5.08394e-05	0.0365387	0.75	PRPH
cg27162705	chr10	114713024	0.486248	0.00010928	0.056451	0.117365	5.09018e-05	0.0365497	0.75	TCF7L2;TCF7L2;TCF7L2;TCF7L2;TCF7L2;TCF7L2
cg19017177	chr19	51141227	0.7238	0.000339397	0.113805	0.116653	5.11772e-05	0.0366797	0.98	SYT3;SYT3;SYT3;SYT3
cg03540028	chr21	43183977	0.64802	0.000112776	0.0577465	0.145909	5.14749e-05	0.0367406	1.04	RIPK4
cg16447311	chr6	1604134	0.691425	0.00029222	0.104287	0.146366	5.25568e-05	0.0372901	1.15
cg07141002	chr22	38201690	0.44172	0.000215459	0.0865094	0.193964	5.41297e-05	0.0381622	1.26	H1F0
cg07477034	chr17	53341969	0.344761	3.06292e-05	0.0243318	0.139865	5.45328e-05	0.0383419	0.84	HLF
cg00703299	chr14	55800645	0.441982	6.06611e-05	0.0387893	0.126387	5.56554e-05	0.038955	0.77	FBXO34;FBXO34
cg05477174	chr15	65648771	0.589457	8.13919e-05	0.0466709	0.118211	5.64318e-05	0.039286	0.75	IGDCC3
cg02895586	chr15	74226609	0.680688	0.00049582	0.139174	0.128114	5.67356e-05	0.039432	1.07	LOXL1
cg20671506	chr9	100505352	0.847482	3.59777e-05	0.0271967	-0.106145	5.6743e-05	0.039432	-0.99
cg07737873	chr9	138266372	0.512967	4.7867e-05	0.0332342	0.113389	5.68641e-05	0.0394758	0.68
cg09530011	chr6	30043818	0.570071	0.000121072	0.0604837	0.149119	5.69076e-05	0.0394758	0.95	RNF39;RNF39
cg07803210	chr5	134371434	0.604354	9.7152e-05	0.052199	0.112813	5.70329e-05	0.0394922	0.73	PITX1;C5orf66
cg09948448	chr17	72967968	0.685417	0.000215696	0.0865597	0.117985	5.74754e-05	0.0396572	0.89	HID1-AS1;HID1
cg16025819	chr3	55525397	0.631975	7.64103e-05	0.0448038	0.115686	5.73992e-05	0.0396572	0.77
cg01161222	chr22	50127486	0.363667	0.0013364	0.228565	-0.118816	5.76571e-05	0.0397134	-1.34
cg10906962	chr17	7707225	0.764105	8.82019e-06	0.010122	-0.126899	5.78887e-05	0.0397658	-0.78	DNAH2
cg11700584	chr14	50088544	0.348916	6.91694e-05	0.0420825	0.175829	5.79751e-05	0.0397899	1.08	RPL36AL;MGAT2
cg07761822	chr4	26323722	0.218685	0.00411109	0.357031	-0.125926	5.84187e-05	0.0400591	-1.81	RBPJ;RBPJ;RBPJ;RBPJ
cg12554483	chr10	135051351	0.338343	7.31019e-05	0.0437218	0.185446	5.86453e-05	0.0400729	1.16	VENTX
cg17144383	chr9	96868748	0.75647	1.12224e-06	0.0020661	-0.203892	5.86048e-05	0.0400729	-1.34	PTPDC1;PTPDC1;PTPDC1;PTPDC1
cg20245362	chr7	127911367	0.605875	0.000336252	0.112945	0.222505	5.93895e-05	0.0404038	1.6
cg24828855	chr6	146008189	0.744371	0.00150442	0.23961	0.123772	5.95962e-05	0.0404736	1.14	EPM2A;EPM2A
cg06654256	chr10	75004632	0.542585	0.000453359	0.132465	0.120433	5.97204e-05	0.0404871	0.89	DNAJC9
cg17671552	chr7	50361461	0.265668	0.00098943	0.198775	-0.123818	5.98275e-05	0.0405052	-1.1	IKZF1;IKZF1;IKZF1;IKZF1;IKZF1;IKZF1;IKZF1;IKZF1;IKZF1;IKZF1;IKZF1;IKZF1;IKZF1;IKZF1;IKZF1;IKZF1;IKZF1
cg12705621	chr17	59528308	0.688097	0.00029116	0.104052	0.119793	6.00174e-05	0.0405822	0.99
cg02311456	chr4	6710661	0.388605	4.94027e-05	0.0339065	0.166952	6.02775e-05	0.0406563	0.99	MRFAP1L1
cg01430344	chr2	16154047	0.521647	0.000380176	0.120893	0.211306	6.04189e-05	0.040712	1.43
cg05669282	chr17	70133170	0.919241	1.43083e-07	0.000416053	-0.200332	6.09397e-05	0.040874	-1.52
cg13867253	chr4	6251264	0.73348	0.000776604	0.175409	0.123515	6.09242e-05	0.040874	1.1
cg24399204	chr2	11636294	0.116431	1.50103e-06	0.00259016	0.117978	6.0975e-05	0.040874	1.29
cg10364115	chr7	2560976	0.149266	3.53775e-07	0.000850948	0.225433	6.12905e-05	0.0410147	1.84	LFNG;LFNG;LFNG;LFNG
cg18184910	chr6	47624247	0.85531	6.28445e-07	0.00131957	-0.191765	6.19212e-05	0.0413299	-1.35	GPR111
cg01858866	chr1	40040016	0.495354	0.000108718	0.0563102	0.11796	6.22611e-05	0.0414145	0.75	PABPC4;PABPC4;PABPC4
cg12305845	chr8	36957694	0.33508	2.18538e-05	0.0195158	0.141806	6.22289e-05	0.0414145	0.86
cg11084532	chr6	132268051	0.641154	0.00131326	0.226886	0.189721	6.23491e-05	0.0414376	1.43
ch,14,1513839R	chr14	93819181	0.181746	0.0104782	0.479232	-0.104828	6.28156e-05	0.0415607	-2.34	KIAA1409
cg23846344	chr6	123109987	0.460023	6.75434e-05	0.0414226	0.14902	6.30319e-05	0.0415744	0.87	SMPDL3A;SMPDL3A
cg24983900	chr10	13129922	0.925151	2.01784e-05	0.0184871	-0.199532	6.30902e-05	0.0415744	-1.81
cg06835707	chr10	88729175	0.607044	8.67974e-05	0.0486865	0.101993	6.32681e-05	0.0416258	0.65	ADIRF;AGAP11
cg07920525	chr2	27988858	0.206154	0.00223901	0.283206	-0.118197	6.44283e-05	0.0422239	-1.45
cg11924172	chr14	95231230	0.578073	0.000165603	0.0746448	0.14015	6.44502e-05	0.0422239	0.9
cg04004466	chr15	39910887	0.794247	0.026542	0.596069	0.115896	6.51584e-05	0.0426121	1.4	FSIP1
cg01224235	chr17	7463837	0.392201	3.43327e-05	0.0264622	0.123117	6.56788e-05	0.0428802	0.73	TNFSF13;TNFSF13;TNFSF13;TNFSF13;TNFSF13;TNFSF13;TNFSF13;SENP3;SENP3-EIF4A1;TNFSF12-TNFSF13
cg01581862	chr15	59665488	0.0784173	1.43517e-07	0.000416053	0.131019	6.58944e-05	0.0429488	1.08	MYO1E
cg03954927	chr1	10346856	0.852646	5.76844e-05	0.0374719	-0.145669	6.64116e-05	0.0432134	-1.14	KIF1B;KIF1B
cg07659054	chr7	27134225	0.381802	6.66364e-05	0.0410558	0.251794	6.65213e-05	0.0432486	1.5	HOXA1;HOXA1
cg12266442	chr5	156778242	0.855118	1.70177e-06	0.00285561	-0.134771	6.67074e-05	0.0433333	-0.8	CYFIP2;CYFIP2;CYFIP2;CYFIP2
cg27038439	chr4	4864320	0.740491	0.000428392	0.128696	0.122329	6.76406e-05	0.0437201	1.2	MSX1
cg05743112	chr17	73850681	0.455612	3.88512e-05	0.0287313	0.161747	6.81987e-05	0.0439167	0.96	WBP2
cg19887750	chr18	47813174	0.405427	7.45098e-05	0.0441223	0.143429	6.82853e-05	0.0439167	0.85	CXXC1;CXXC1
cg06670599	chr6	31631801	0.658857	0.000598074	0.154013	0.145807	6.92537e-05	0.0443568	1.12	BAT4
cg14442492	chr5	95296150	0.54802	0.000135112	0.0650784	0.138124	7.00933e-05	0.0447471	0.88	ELL2
cg00063111	chr3	39448952	0.226545	1.64429e-05	0.016174	0.162744	7.03243e-05	0.044781	1.05	SNORA6;RPSA;RPSA
cg16882323	chr18	42792171	0.623984	0.00027791	0.101223	0.203803	7.03584e-05	0.044781	1.48	SLC14A2
cg18628367	chr7	157475548	0.350196	7.42063e-05	0.0440647	0.112661	7.04347e-05	0.044781	0.7	PTPRN2;PTPRN2;PTPRN2
cg04141796	chr5	42950062	0.0957802	8.37493e-06	0.00983093	0.361124	7.07597e-05	0.0449509	3.57
cg06804705	chr21	40125580	0.792007	7.31531e-06	0.00890822	-0.150729	7.09898e-05	0.0450602	-0.95	NCRNA00114;NCRNA00114;NCRNA00114
cg00290483	chr17	71639029	0.549254	0.000223111	0.0882589	0.161226	7.1472e-05	0.0452188	1.03	SDK2
cg02582963	chr3	153840718	0.43343	5.76147e-05	0.0374719	0.120275	7.14724e-05	0.0452188	0.71	SGEF
cg08467416	chr5	49597832	0.504203	0.000137521	0.0657264	-0.164609	7.17528e-05	0.0453223	-1.02
cg03984269	chr10	43726142	0.700516	0.000304566	0.10678	0.10003	7.21314e-05	0.045369	0.78	RASGEF1A;RASGEF1A
cg11912668	chr1	7167171	0.765509	2.45115e-05	0.0208906	-0.114507	7.19178e-05	0.045369	-0.77	CAMTA1
cg23606722	chr12	133319848	0.81382	5.75117e-06	0.00740998	-0.164376	7.22354e-05	0.045369	-1.25	ANKLE2;ANKLE2
cg11728223	chr17	263815	0.220954	0.0265714	0.596164	-0.111359	7.26557e-05	0.0455185	-2.83	C17orf97
cg14035789	chr20	56255320	0.613132	0.000483738	0.137788	0.205188	7.26459e-05	0.0455185	1.65	PMEPA1;PMEPA1;PMEPA1;PMEPA1;PMEPA1
cg21530469	chr2	32490776	0.641844	1.98316e-05	0.0182988	-0.266797	7.32075e-05	0.0457208	-1.65	NLRC4;NLRC4;NLRC4;NLRC4;NLRC4;NLRC4
cg11736230	chr14	104313012	0.354939	4.19505e-05	0.0304033	0.144673	7.35061e-05	0.0458336	0.87	PPP1R13B
cg03199745	chr12	54454445	0.321987	3.46203e-05	0.026526	0.139114	7.45829e-05	0.046272	0.86	FLJ12825
cg14557185	chr3	149374763	0.772383	0.0014881	0.238615	0.11365	7.45608e-05	0.046272	1.26	WWTR1;WWTR1;WWTR1
cg16976968	chr11	33189542	0.837002	5.1024e-06	0.0068028	-0.132752	7.43955e-05	0.046272	-0.96
cg24114772	chr21	15457266	0.912895	5.25588e-07	0.00115026	-0.144534	7.51505e-05	0.0464858	-1.26
cg06005844	chr17	14206874	0.238772	7.5268e-06	0.00913711	0.161167	7.52284e-05	0.046497	1.09	HS3ST3B1;MGC12916
cg01757548	chr6	170730413	0.919304	4.75154e-07	0.00106693	-0.129275	7.61497e-05	0.0468058	-1.41
cg11574745	chr6	5087031	0.617879	0.000350899	0.115579	0.146732	7.61175e-05	0.0468058	1.02	PPP1R3G;PPP1R3G
cg03994820	chr3	350682	0.479787	0.00057129	0.150253	-0.21275	7.64842e-05	0.0469372	-1.46	CHL1
cg01704105	chr16	225666	0.443279	8.54878e-05	0.048219	0.147379	7.69461e-05	0.047122	0.86	HBA1
cg25431382	chr20	48836667	0.706194	1.95469e-05	0.0181264	-0.141146	7.69674e-05	0.047122	-0.85
cg18049167	chr6	32121261	0.268361	2.71834e-05	0.0225092	0.233355	7.77387e-05	0.0475567	1.56	PPT2;PPT2
cg14273116	chr4	107897	0.216334	1.27935e-05	0.0133076	0.119983	7.79617e-05	0.0476556	0.85	ZNF718
cg27553457	chr19	45899615	0.631813	0.00012301	0.0609499	0.117483	7.80638e-05	0.0476806	0.8	PPP1R13L;PPP1R13L
cg06974867	chr8	93770861	0.226357	0.0094291	0.463735	-0.134358	7.87884e-05	0.0478785	-1.46	FLJ46284
cg10756618	chr3	126627942	0.552819	7.75491e-05	0.0450985	0.107374	7.98207e-05	0.048298	0.66	CHCHD6
cg17952647	chr6	1604212	0.335927	5.45426e-05	0.0361565	0.113042	8.03084e-05	0.0485553	0.7
cg23197236	chr11	27517928	0.855716	0.000152529	0.0709151	-0.247689	8.13513e-05	0.0489572	-2.06	LIN7C
cg01433297	chr20	4151816	0.845029	5.23059e-06	0.00692295	-0.112532	8.16754e-05	0.0490762	-0.97	SMOX;SMOX;SMOX;SMOX
cg02033666	chr7	127774986	0.32017	4.44812e-05	0.0315551	0.170201	8.23259e-05	0.0494275	1.04
cg01811695	chr16	2108342	0.865268	0.00016754	0.0751536	-0.124469	8.2582e-05	0.0495061	-1.27	TSC2;TSC2;TSC2
cg15962314	chr1	44399869	0.429932	0.000221834	0.0879749	-0.113389	8.32765e-05	0.0498455	-0.77	ARTN;ARTN;ARTN;ARTN
