# Supplementary material for: A genome-wide DNA methylation signature for SETD1B-related syndrome
Source: Clin Epigenetics. 2019 Nov 4;11:156. doi: 10.1186/s13148-019-0749-3 (PMC6830011; doi:10.1186/s13148-019-0749-3)
Supplement: Supplementary file 4 — Additional file 4: Table S4. Cohort details. [file 13148_2019_749_MOESM4_ESM.xlsx]

## Sheet: All indyviduals 
Sample_Group	Age	Sex	Sample_ID	Batch
P	16.3	F	4_del12q	batch 1		All individuals
P	6	M	dup12q	batch 1			Number	age(mean)	Female	Males	Batch1	Batch2
P	3	M	3_del12q	batch 1		Patients	13	2,6-34 (11,24)	4	9	7	6
P	2.3	F	1_del12q	batch 1		Controls	60	0,01-33,7 (10,59)	30	30	40	20
P	16	M	2_mut	batch 1		SETD1B-related group
P	8	M	6_mut	batch 1		Patients	7	7-34(15,6)	3	4	3	4
P	13	M	1_mut	batch 1		Controls	59	1-33,7 (10,59)	29	30	40	19
P	12	F	4_mut	batch2		KDM2B-related group
P	34	M	3_mut	batch2		Patients	2	2,3-12 (7,1)	2	0	1	1
P	10	M	7_mut	batch2		Controls	59	1-33,7 (10,59)	29	30	40	19
P	7	M	5_mut	batch2
P	12	F	2_del12q	batch2
P	2.6	M	5_del12q	batch2
C	16	F		batch 1
C	16	F		batch 1
C	16	F		batch 1
C	16	F		batch 1
C	16	F		batch 1
C	16	F		batch 1
C	16	F		batch 1
C	16	F		batch 1
C	16	F		batch 1
C	16	F		batch 1
C	3	F		batch 1
C	3	F		batch 1
C	3	F		batch 1
C	3	F		batch 1
C	3	F		batch 1
C	3	F		batch 1
C	3	F		batch 1
C	3	F		batch 1
C	2	F		batch 1
C	3	F		batch 1
C	16	M		batch 1
C	16	M		batch 1
C	16	M		batch 1
C	16	M		batch 1
C	13	M		batch 1
C	13	M		batch 1
C	13	M		batch 1
C	13	M		batch 1
C	8	M		batch 1
C	8	M		batch 1
C	8	M		batch 1
C	8	M		batch 1
C	6	M		batch 1
C	6	M		batch 1
C	6	M		batch 1
C	6	M		batch 1
C	3	M		batch 1
C	3	M		batch 1
C	3	M		batch 1
C	3	M		batch 1
C	13	M		batch2
C	6	M		batch2
C	13	M		batch2
C	16	F		batch2
C	16	F		batch2
C	33.1	F		batch2
C	6	M		batch2
C	8	M		batch2
C	3	M		batch2
C	1	F		batch2
C	33.4	M		batch2
C	3	F		batch2
C	16	F		batch2
C	3	F		batch2
C	6	M		batch2
C	33.7	F		batch2
C	0.01	F		batch2
C	3	M		batch2
C	33.7	M		batch2
C	16	F		batch2

## Sheet: SETD1B-related 
Sample_Group	Age	Sex	Batch	Sample_ID
P	13	M	1	1_mut
P	16	M	1	2_mut
P	12	F	2	3_mut
P	34	M	2	4_mut
P	7	M	2	5_mut
C	16	F	1
C	16	F	1
C	16	F	1
C	16	F	1
C	16	F	1
C	16	F	1
C	16	F	1
C	16	F	1
C	16	F	1
C	16	F	1
C	3	F	1
C	3	F	1
C	3	F	1
C	3	F	1
C	3	F	1
C	3	F	1
C	3	F	1
C	3	F	1
C	2	F	1
C	3	F	1
C	16	M	1
C	16	M	1
C	16	M	1
C	16	M	1
C	13	M	1
C	13	M	1
C	13	M	1
C	13	M	1
C	8	M	1
C	8	M	1
C	8	M	1
C	8	M	1
C	6	M	1
C	6	M	1
C	6	M	1
C	6	M	1
C	3	M	1
C	3	M	1
C	3	M	1
C	3	M	1
C	13	M	2
C	6	M	2
C	13	M	2
C	16	F	2
C	16	F	2
C	33.1	F	2
C	6	M	2
C	8	M	2
C	3	M	2
C	1	F	2
C	33.4	M	2
C	3	F	2
C	16	F	2
C	3	F	2
C	6	M	2
C	33.7	F	2
C	3	M	2
C	33.7	M	2
C	16	F	2

## Sheet: KDM2B-related 
Sample_Group	Age	Sex	Sample_ID	Batch
P	2.3	F	1_del12q	batch 1
P	12	F	2_del12q	batch2
C	16	F		batch 1
C	16	F		batch 1
C	16	F		batch 1
C	16	F		batch 1
C	16	F		batch 1
C	16	F		batch 1
C	16	F		batch 1
C	16	F		batch 1
C	16	F		batch 1
C	16	F		batch 1
C	3	F		batch 1
C	3	F		batch 1
C	3	F		batch 1
C	3	F		batch 1
C	3	F		batch 1
C	3	F		batch 1
C	3	F		batch 1
C	3	F		batch 1
C	2	F		batch 1
C	3	F		batch 1
C	16	M		batch 1
C	16	M		batch 1
C	16	M		batch 1
C	16	M		batch 1
C	13	M		batch 1
C	13	M		batch 1
C	13	M		batch 1
C	13	M		batch 1
C	8	M		batch 1
C	8	M		batch 1
C	8	M		batch 1
C	8	M		batch 1
C	6	M		batch 1
C	6	M		batch 1
C	6	M		batch 1
C	6	M		batch 1
C	3	M		batch 1
C	3	M		batch 1
C	3	M		batch 1
C	3	M		batch 1
C	13	M		batch2
C	6	M		batch2
C	13	M		batch2
C	16	F		batch2
C	16	F		batch2
C	33.1	F		batch2
C	6	M		batch2
C	8	M		batch2
C	3	M		batch2
C	1	F		batch2
C	33.4	M		batch2
C	3	F		batch2
C	16	F		batch2
C	3	F		batch2
C	6	M		batch2
C	33.7	F		batch2
C	3	M		batch2
C	33.7	M		batch2
C	16	F		batch2
