# Supplementary material for: A genome-wide DNA methylation signature for SETD1B-related syndrome
Source: Clin Epigenetics. 2019 Nov 4;11:156. doi: 10.1186/s13148-019-0749-3 (PMC6830011; doi:10.1186/s13148-019-0749-3)
Supplement: Supplementary file 5 — Additional file 5: Table S5. The list of 502 samples used in the examination of the specificity of the SETD1B-related DNAm signature. [file 13148_2019_749_MOESM5_ESM.xlsx]

## Sheet: Sheet1
ID	Syndrome	Sex	Age	Genetic change
MS0494	ADCADN			DNMT1 - NM_001130823.1:c.1709C>T [p.Ala570Val]
MS0495	ADCADN			DNMT1 - NM_001130823.1:c.1709C>T [p.Ala570Val]
MS0496	ADCADN			DNMT1 - NM_001130823.1:c.1709C>T [p.Ala570Val]
MS0497	ADCADN			DNMT1 - NM_001130823.1:c.1709C>T [p.Ala570Val]
MS0498	ADCADN			DNMT1 - NM_001130823.1:c.1709C>T [p.Ala570Val]
MS0997	ADNP syndrome	f	0.4	ADNP c.2491_2494 del
MS1159	ADNP syndrome	m	8	ADNP c.2340T>G (p.Tyr780*)
MS1166	ADNP syndrome	m	11	ADNP c.103dupA (p.Ile35Asnfs*5)
MS1167	ADNP syndrome	f	12	ADNP c.2157C>G (p.Tyr719*)
MS1174	ADNP syndrome	m	2	ADNP c.1106_1108delTACinsCTGT (p.Leu369Serfs*30)
MS1182	ADNP syndrome	f	3	ADNP c.2157C>A (p.Tyr719*)
MS1183	ADNP syndrome	m	2	ADNP c.1102C>T (p.Gln368*)
MS1184	ADNP syndrome	m	12	ADNP c.2419_2423delAAAAG (p.Lys807Glufs*6)
MS1254	ADNP syndrome	f	5	ADNP c.2157C>A (p.Tyr719*)
MS1255	ADNP syndrome	f	4	ADNP c.2157C>G (p.Tyr719*)
MS1256	ADNP syndrome	f	4	ADNP c.1222_1223delAA (p.Lys408Valfs*31)
MS1257	ADNP syndrome	m	3.1	ADNP c.2268dup (p.Lys757Glnfs*4)
MS1260	ADNP syndrome	m	4	ADNP c.539_542delTTAG (p.V180Gfs*17)
MS1261	ADNP syndrome	f	11.9	ADNP c.190dupA (p.T64Nfs*35)
MS1262	ADNP syndrome	m	13.4	ADNP c.2156dupA (rs1135401808 )
MS1264	ADNP syndrome	f	8.7	ADNP c.1287dupT (p.Ala430Cysfs*10)
MS1265	ADNP syndrome	m	4.2	ADNP c.2188C>T (p.Arg730*)
MS1268	ADNP syndrome	m	10.5	ADNP c.2287delT (p.Ser763Profs*9)
MS1269	ADNP syndrome	m	5.6	ADNP c.819delC (p.Lys274Asnfs*31)
MS1270	ADNP syndrome	m	12.3	ADNP c.201G>C (p.Q67H)
MS1273	ADNP syndrome	m	2.9	ADNP c.859_862dup(p.Gly288Aspfs*27)
MS1276	ADNP syndrome	m	5.4	ADNP c.2157C>A (p.Tyr719*)
MS1277	ADNP syndrome	f	12	ADNP c.2156_2157insA (p.Tyr719*)
MS1278	ADNP syndrome	m	2.5	ADNP c.2287dupT (p.Ser763Phefs*3)
MS1279	ADNP syndrome	m	10.1	ADNP c.1046_1047delTG (p.Leu349Argfs*49)
MS1507	ADNP syndrome	m	2	ADNP c.56_57del
MS1510	ADNP syndrome	m	0.6	ADNP c.2630_2633del
MS0577	Angelman syndrome	m	1
MS0578	Angelman syndrome	f	4
MS0579	Angelman syndrome	f	15
MS0580	Angelman syndrome	m	1
MS0581	Angelman syndrome	m	4
MS0582	Angelman syndrome	m	1
MS0583	Angelman syndrome	f	1
MS0584	Angelman syndrome	f	10
MS0585	Angelman syndrome	f	14
MS0586	Angelman syndrome	f	6
MS0587	Angelman syndrome	m	25
MS0588	Angelman syndrome	f	7
MS0590	Angelman syndrome	m	13
MS0592	Angelman syndrome	m	55
MS0947	Angelman syndrome		18
MS1400	Angelman syndrome
MS1423	Angelman syndrome
MS1448	Angelman syndrome	m
MS0564	ATRX syndrome	m	6.3	ATRX c.6254G>A; p.R2085H
MS0565	ATRX syndrome	m	18	ATRX c.736T>C; p.R246C
MS0566	ATRX syndrome	m	1.4	ATRX c.6593A>G; p.H2198R
MS0568	ATRX syndrome	m	18.5	ATRX c.758T>C; p.L253S
MS0569	ATRX syndrome	m		ATRX c.109C>T; p.R37X
MS0570	ATRX syndrome	m	21	ATRX c.4817G>A; p.S1606N
MS0573	ATRX syndrome	m	18	ATRX c.952G>T; p.G249C
MS0574	ATRX syndrome	m	14	ATRX c.730A>C; p.I244L
MS0593	ATRX syndrome	m	4.4	ATRX deletion of exon 207
MS0594	ATRX syndrome	m		ATRX c.109C>T; p.R37X
MS0595	ATRX syndrome	m	27	ATRX c.7366_7367 InsA; p.M2456N fs X42
MS0596	ATRX syndrome	m	14.5	ATRX c.109C>T; p.R37X
MS0597	ATRX syndrome	m	2.5	ATRX c.736C>T; P.R246C
MS0598	ATRX syndrome	m	17.5	ATRX c.109C>T; p.R37X
MS0599	ATRX syndrome	m	14	ATRX c.109C>T; p.R37X
MS0412	BAFopathy_CSS1	m	6	read our Nat Commun paper for mutations
MS0672	BAFopathy_CSS1	m	18.5	ARID1B mutation: c.5833T>C; p.Cys1945Arg
MS0674	BAFopathy_CSS1	m	7.5	ARID1B mutation: c.3444C>G; p. Tyr1148*
MS0676	BAFopathy_CSS1	f	17	ARID1B mutation: c.3236delT; p.Phe1079Serfs*51
MS0678	BAFopathy_CSS1	f	4	ARID1B mutation: c.3716delC; p.Pro1239Hisfs*5
MS0680	BAFopathy_CSS1	m	16	ARID1B mutation: c.2457dupT; p.Pro819fs*
MS1169	BAFopathy_CSS1	f	15	ARID1B c.1259delA
MS1170	BAFopathy_CSS1	m	2	ARID1B c.5605C>T
MS1176	BAFopathy_CSS1	f	13	ARID1B c.2692C>CT
MS1177	BAFopathy_CSS1	m	11	ARID1B c.3223C>CT
MS1201	BAFopathy_CSS1	m	1.5	ARID1B c.1259delA (p.N420Ifs*10)
MS1212	BAFopathy_CSS1	f	3	ARID1B c.3898C>T
MS1213	BAFopathy_CSS1	m	11	ARID1B c.1701del (p.Ala569Profs*21)
MS1215	BAFopathy_CSS1	f	22.8	ARID1B c.3352_3359dup (p.Met1120Ilefs*53)
MS1216	BAFopathy_CSS1	f	21	ARID1B c.1483C>T
MS1217	BAFopathy_CSS1	f	23	ARID1B c.3478delG
MS1408	BAFopathy_CSS1			ARID1B Het c.5968C>T (p.Arg1990*), path
MS1426	BAFopathy_CSS1	f	8	ARID1B
MS0679	BAFopathy_CSS3	f	7.5	SMARCB1 mutation: c.1091_1093delAGA; p.Lys364del
MS0681	BAFopathy_CSS3	f	0.05	SMARCB1 mutation: c.1130G>A; p.Arg377His
MS0683	BAFopathy_CSS3	m	0.2	SMARCB1 mutation: c.1130G>A; p.Arg377His
MS1162	BAFopathy_CSS3	f	0.1	SMARCB1 c.1121G>A
MS1163	BAFopathy_CSS3	m	7	SMARCB1 c.1096C>T Het
MS1168	BAFopathy_CSS4	m	3	SMARCA4 c.1452_1453delGGinsA
MS1209	BAFopathy_CSS4	f	0.1	SMARCA4 c.2932C>G
MS1160	BAFopathy_NCBRS	m	1	SMARCA2 c.2639C>T
MS1185	BAFopathy_NCBRS	f	8	SMARCA2 c.2261G>C;p.Gly754Ala
MS1221	BAFopathy_NCBRS	m	10	SMARCA2 c.3602C>T p.A1201V
MS1222	BAFopathy_NCBRS	f	11	SMARCA2 c.3485G>A p.R1162H
MS1223	BAFopathy_NCBRS	m	15	SMARCA2 c.3476G>T p.R1159L
MS1227	BAFopathy_NCBRS	m	17	SMARCA2 c.2647C>G; p.P883A
MS1237	BAFopathy_NCBRS	m	4	SMARCA2 c.3475C>G p.R1159G
MS1238	BAFopathy_NCBRS	f	35	SMARCA2 c.2642G>T p.G881V
MS1243	BAFopathy_NCBRS	m	5	SMARCA2 c.3404T>C p.L1135P
MS1755	BAFopathy_NCBRS	m	15	SMARCA2 c.3493C > A, p.Gln1165Lys
MS1756	BAFopathy_NCBRS	f	14	SMARCA2 c.3209 T > A, p.Leu1070Gln
MS1757	BAFopathy_NCBRS	f	1	SMARCA2 c.2639 C > T, p.Thr880Ile
MS1758	BAFopathy_NCBRS	m	4	SMARCA2 c.2648C > T, p.Pro883Leu
MS1759	BAFopathy_NCBRS	f	11	SMARCA2 c.2486C > T, p.Thr829Ile
MS1760	BAFopathy_NCBRS	m	10	SMARCA2 c.2264A > G, p.Lys755Arg
MS1761	BAFopathy_NCBRS	f	9	SMARCA2 c.3623C > G, p.Ser1208Cys
MS1762	BAFopathy_NCBRS	f	7	SMARCA2 c.2348C > G, p.Ser783Trp
MS1763	BAFopathy_NCBRS	m	0.5	SMARCA2 c.2564G > C, p.Arg855Pro
MS1764	BAFopathy_NCBRS	f	4	SMARCA2 c.2255G > C, p.Gly752Ala
MS1765	BAFopathy_NCBRS	f	16	SMARCA2 c.3849G > T, p.Trp1283Cys
MS1766	BAFopathy_NCBRS	m	14	SMARCA2 c.2558G > T, p.Gly853Val
MS1852	BAFopathy_NCBRS	f	32	SMARCA2 VUS; methylation predicted BAFopathy
MS0604	Beckwith-Wiedemann syndrome	f	0.8
MS0606	Beckwith-Wiedemann syndrome	f	0.1
MS0637	Beckwith-Wiedemann syndrome	f	0.1
MS0640	Beckwith-Wiedemann syndrome	f	0.1
MS0641	Beckwith-Wiedemann syndrome	f	0.2
MS0642	Beckwith-Wiedemann syndrome	f	0.1
MS0644	Beckwith-Wiedemann syndrome	f	0.1
MS0646	Beckwith-Wiedemann syndrome	f	0.1
MS0949	Beckwith-Wiedemann syndrome
MS1404	Beckwith-Wiedemann syndrome
MS1420	Beckwith-Wiedemann syndrome
CHD7-1	CHARGE syndrome	f	4	CHD7 c.7282C>T (p.Arg2428*)
CHD7-10	CHARGE syndrome	f	0.02	CHD7 c.2905_2906del (p.Arg969Glyfs*25)
CHD7-11	CHARGE syndrome	m	12	CHD7 c.7636G>T (p.Glu2546*)
CHD7-12	CHARGE syndrome	m	19	CHD7 c.361delC (p.Gly121Valfs*90)
CHD7-13	CHARGE syndrome	m	19	CHD7 c.2504_2508delATCTT (p.Arg835Serfs*14)
CHD7-14	CHARGE syndrome	m	4	CHD7 c.7717-7720del (p.Gln2537*)
CHD7-15	CHARGE syndrome	m	11	CHD7 c.5458C>T (p.Arg1820*)
CHD7-16	CHARGE syndrome	m	7	CHD7 exon 1 deletion
CHD7-17	CHARGE syndrome	m	15	CHD7 c.5405-17G>A
CHD7-18	CHARGE syndrome	f	10	CHD7 c.5405-7G>A
CHD7-2	CHARGE syndrome	m	6	CHD7 c.3526C>T (p.Gln1176*)
CHD7-23	CHARGE syndrome	m	0.5	CHD7 c.-15G>A
CHD7-24	CHARGE syndrome	m	2	CHD7 c.4225G>A (p.Val1409Met )
CHD7-3	CHARGE syndrome	f	14	CHD7 c.934C>T (p.Arg312*)
CHD7-34	CHARGE syndrome			CHD7 c.5097dupA (p.Ala1700Serfs*37)
CHD7-36	CHARGE syndrome			CHD7 c.799G>T (p.Glu267*)
CHD7-4	CHARGE syndrome	m	13	CHD7 c562C>T (p.Gly188*)
CHD7-40	CHARGE syndrome			CHD7 c.1312C>T (p.Gln438*)
CHD7-41	CHARGE syndrome			CHD7 c.6322G>A (p.Gly2108Arg)
CHD7-46	CHARGE syndrome			CHD7 c.5050G>A (p.Gly1684Ser)
CHD7-47	CHARGE syndrome			CHD7 c.5210+3A>G
CHD7-5	CHARGE syndrome	m	18	CHD7 c.1327delATGGG (p.Met443Asnfs*130)
CHD7-51	CHARGE syndrome			CHD7 c.4087delC (p.Leu1363Serfs*9)
CHD7-52	CHARGE syndrome			CHD7 c.2498+1G>T
CHD7-53	CHARGE syndrome			CHD7 c.1918delG (p.Gly640Lysfs*71)
CHD7-55	CHARGE syndrome			CHD7 c.604 C>T (p.Gln202*)
CHD7-56	CHARGE syndrome			CHD7 c.4393C>T (p.Arg1465*)
CHD7-58	CHARGE syndrome			CHD7 c.5029C>T (p.Arg1677*)
CHD7-6	CHARGE syndrome	m	24	CHD7 c.2504_2508delATCTT (p.Tyr835Serfs*14)
CHD7-60	CHARGE syndrome			CHD7 c.3177T>G (p.Tyr1059*)
CHD7-61	CHARGE syndrome			CHD7 c.2839C>T (p.Arg947*)
CHD7-63	CHARGE syndrome			CHD7 c.4361_4362delAG (p.Gln1454Profs*21)
CHD7-64	CHARGE syndrome			CHD7 c.2362C>T (p.Gln788*)
CHD7-68	CHARGE syndrome			CHD7 c.8507delC (p.Pro2836Argfs*53)
CHD7-69	CHARGE syndrome			CHD7 c.3655C>T (p.Arg1219*)
CHD7-7	CHARGE syndrome	m	3	CHD7 c.1990G>T (p.Glu664*)
CHD7-71	CHARGE syndrome			CHD7 c.1141_1142delAT (p.Met381Alafs*23)
CHD7-72	CHARGE syndrome			CHD7 c.3082A>G (p.Ile1028Val)
CHD7-8	CHARGE syndrome	f	6	CHD7 c.3377dupT (p.Leu1126Phefs*46)
CHD7-9	CHARGE syndrome	m	9	CHD7 c.2585delA (p.Leu862Serfs*26)
KMT2D-28	CHARGE syndrome			CHD7 c.10909C>A (p.Pro3637Thr)
MS0979	CHARGE syndrome	f	0.5	CHD7 c.7252C>T, p.R2418X
MS0980	CHARGE syndrome	m	16	CHD7 c.6775+1G>A
MS0984	CHARGE syndrome	f	0.005	CHD7 c.959_960delAG
MS0985	CHARGE syndrome	m	0.2	CHD7 c.5607+1G>A
MS0991	CHARGE syndrome	f	15.4	CHD7 c.3654C>G, p.Y1218X
MS0992	CHARGE syndrome	m	2.1	CHD7 c.3640C>T, p.Q1214X
MS0995	CHARGE syndrome	m	0.1	CHD7 c.1972G>T, p.E658X
MS0996	CHARGE syndrome	f	3.2	CHD7 c.3778+1G>A
MS0998	CHARGE syndrome	f	4.4	CHD7 c.2915A>G, Q972R
MS0999	CHARGE syndrome	f	0.3	CHD7 c.2053_2058dup6, c.5517dupT
MS1003	CHARGE syndrome	f	0.8	CHD7 c.7957C>T, p.R2653X
MS1007	CHARGE syndrome	m	0.003	CHD7 c.559C>T, p.Q187X
MS1011	CHARGE syndrome	f	1.5	CHD7 c.4015C>T, p.R1339X
MS1012	CHARGE syndrome	m	0.01	CHD7 c.2049delG
MS1014	CHARGE syndrome	m	0.01	CHD7 c.5050+1G>A
MS1015	CHARGE syndrome	m	0.7	CHD7 c.5405-17G>A, abnormal splicing confirmed by RNA-Seq
MS1016	CHARGE syndrome	m	17.5	CHD7 c.7047C>A, p.Y2349X
MS1027	CHARGE syndrome	f	0.3	CHD7 c.3339delG
MS1029	CHARGE syndrome	m	0.1	CHD7 c.4402delG
MS1030	CHARGE syndrome	m	0.2	CHD7 c.5074G>T, p.G1692X
MS1031	CHARGE syndrome	f	7.5	CHD7 c.5405-17G>A (de novo)
MS1032	CHARGE syndrome	m	1.5	CHD7 c.3548 delA
MS1034	CHARGE syndrome	m	0.01	CHD7 c.5405-17G>A
MS1035	CHARGE syndrome	m	0.2	CHD7 c.6243C>A, p.C2081X).
MS1036	CHARGE syndrome	f	0.9	CHD7 c.5768dupG
MS1037	CHARGE syndrome	f	1	CHD7 c.7282C>T, p.R2428X
MS1038	CHARGE syndrome	m	2.1	CHD7 c.1152delA
MS1039	CHARGE syndrome	f	0.1	CHD7 c.2614-2_2614-1dupAG
MS1049	CHARGE syndrome	m	10.1	CHD7 c.7219delA
MS1407	CHARGE syndrome			CHD7 Het c.7144dupA (p.2382Asnfs*29), likely path
GSM2897974	Claes-Jensen syndrome			KDM5C
GSM2897975	Claes-Jensen syndrome			KDM5C
GSM2897976	Claes-Jensen syndrome			KDM5C
GSM2897977	Claes-Jensen syndrome			KDM5C
GSM2897978	Claes-Jensen syndrome			KDM5C
GSM2897979	Claes-Jensen syndrome			KDM5C
MS0690	Claes-Jensen syndrome	m	30	KDM5C c.1510G>A; p.V504M
MS0691	Claes-Jensen syndrome	m	6	KDM5C c.1439C>T; p.P480L
MS0692	Claes-Jensen syndrome	m	26	KDM5C c.4439_4440delAG; p.fsR1481fxX9
MS0693	Claes-Jensen syndrome	m	42	KDM5C IVS11+5G>A; p.E468GfsX2
MS0695	Claes-Jensen syndrome	m	8	KDM5C c.1510G>A; p.V504M
MS0697	Claes-Jensen syndrome	m	2	KDM5C c.1439C>T; p.P480L
MS0723	Claes-Jensen syndrome	m	37	KDM5C c.229G>A; p.A77T
MS0726	Claes-Jensen syndrome	m	28	KDM5C c.4439_4440delAG; p.fsR1481fxX9
MS0727	Claes-Jensen syndrome	m	13	KDM5C c.229G>A; p.A77T
MS0728	Claes-Jensen syndrome	m	26	KDM5C c.1510G>A; p.V504M
MS1283	Claes-Jensen syndrome	m	9.5	KDM5C c.3551C>T (p.Thr1184Ile)
MS1338	Claes-Jensen syndrome	m	4	KDM5C alteration p.Ala1000GLNfx*7 (Likely Pathogenic)
MS1339	Claes-Jensen syndrome	m	3	KDM5C alteration p.Ala1000GLNfx*7 (likely pathogenic) and p.GLN1508* (de novo)
MS1347	Claes-Jensen syndrome	m		KDM5C c.1747G>T;p.Val583Phe
MS1354	Claes-Jensen syndrome	m	15	KDM5C: NM_004187.1, c.3258_3259insC, p.k1087fs*43
MS1355	Claes-Jensen syndrome	m	9	KDM5C: NM_004187.3 C2153_2155del p.Ala718_Leu719delinsVal
MS1357	Claes-Jensen syndrome	m	4	KDM5C: NM_004187: c.994C>T, exon 8, p.A332x
MS1359	Claes-Jensen syndrome	m	58	KDM5C: NM_004187: c.1204G>T p.D402y
MS1360	Claes-Jensen syndrome	m	11	KDM5C: NM_004187: 1160C>A, exon 12, p.P544T
MS1361	Claes-Jensen syndrome	m	9	KDM5C: NM_004187: chrx:53240725C>A (nonsynonymous SNV)
MS1373	Claes-Jensen syndrome	m	25	KDM5C c.1151G>A p.Gly384Asp
MS1375	Claes-Jensen syndrome	m	20	KDM5C c.1151G>A p.Gly384Asp
MS1376	Claes-Jensen syndrome	m	30	KDM5C c.1151G>A p.Gly384Asp
MS1535	Claes-Jensen syndrome	m	3.9	KDM5C Mutation
MS1538	Claes-Jensen syndrome	m	9.1	KDM5C mutation
MS1284	Cornelia de Lange syndrome		0.01	NIPBL c.4002_4005del4
MS1286	Cornelia de Lange syndrome		5	SMC1A c.1487G>A p.R496H
MS1288	Cornelia de Lange syndrome		39	SMC3 1464_1466delAGA
MS1289	Cornelia de Lange syndrome		34	HDAC8 881G>A p.W294X
MS1292	Cornelia de Lange syndrome		10	RAD21 592_593dup
MS1301	Cornelia de Lange syndrome		1.4	HDAC8 1001A>G;H334R
MS1303	Cornelia de Lange syndrome		5	HDAC8 932C>T;T311M
MS1304	Cornelia de Lange syndrome		15	NIPBL 5689_5691del3;N1896delN
MS1305	Cornelia de Lange syndrome		1.4	NIPBL 4606C>T; R1536X
MS1306	Cornelia de Lange syndrome		10	NIPBL c.64+1G>A
MS1307	Cornelia de Lange syndrome		9.6	NIPBL 4529dupA;S1511TfsX79
MS1308	Cornelia de Lange syndrome		10.11	RAD21 1127C>G;P376R
MS1309	Cornelia de Lange syndrome		7.7	SMC1A 802_804del3;K268del
MS1310	Cornelia de Lange syndrome		5.1	SMC1A 3146G>A; R1049Q
MS1311	Cornelia de Lange syndrome		3.2	SMC1A 3070A>T;N1024Y
MS1312	Cornelia de Lange syndrome		4	SMC1A 1934delA;E645GfsX24
MS1313	Cornelia de Lange syndrome		4.1	SMC3 1990C>G;L664V
MS1424	Cornelia de Lange syndrome	f		SMC1A c.20_23del (p.I7Rfs*42), Likely pathogenic
MS1488	Cornelia de Lange syndrome	m	0.7	NIPBL
MS1491	Cornelia de Lange syndrome	m	12	NIPBL
MS1496	Cornelia de Lange syndrome		10	NIPBL
MS1504	Cornelia de Lange syndrome		2	RAD21
MS1792	Cornelia de Lange syndrome	f	4	HDAC8 NM_018486.2:c.863T>C
MS1829	Cornelia de Lange syndrome	f	1	SMC1A NM_006306.3:c.2455A>C
MS1831	Cornelia de Lange syndrome	m	5	SMC1A NM_006306.3:c.3254A>G
GSM1272122	Down syndrome	m	18
GSM1272123	Down syndrome	f	12
GSM1272124	Down syndrome	f	13
GSM1272125	Down syndrome	m	24
GSM1272126	Down syndrome	m	33
GSM1272127	Down syndrome	f	31
GSM1272128	Down syndrome	f	19
GSM1272129	Down syndrome	m	29
GSM1272130	Down syndrome	f	22
GSM1272131	Down syndrome	m	38
GSM1272132	Down syndrome	m	34
GSM1272133	Down syndrome	f	37
GSM1272134	Down syndrome	f	10
GSM1272135	Down syndrome	m	33
GSM1272136	Down syndrome	f	35
GSM1272137	Down syndrome	m	18
GSM1272138	Down syndrome	m	16
GSM1272139	Down syndrome	m	18
GSM1272140	Down syndrome	m	27
GSM1272141	Down syndrome	m	43
GSM1272142	Down syndrome	m	33
GSM1272143	Down syndrome	m	22
GSM1272144	Down syndrome	m	18
GSM1272145	Down syndrome	f	21
GSM1272146	Down syndrome	m	32
GSM1272147	Down syndrome	m	26
GSM1272148	Down syndrome	m	43
GSM1272149	Down syndrome	f	16
GSM1272150	Down syndrome	f	22
MS0811	Down syndrome	m
MS0812	Down syndrome	m
MS0813	Down syndrome	f
MS0814	Down syndrome	m
MS0816	Down syndrome	m
MS0818	Down syndrome	f
MS0820	Down syndrome	m
MS1418	Down syndrome	f	0.1
GSM1624862	Dup7			7q11.23 duplication
GSM1624863	Dup7			7q11.23 duplication
GSM1624864	Dup7			7q11.23 duplication
GSM1624865	Dup7			7q11.23 duplication
GSM1624866	Dup7			7q11.23 duplication
GSM1624867	Dup7			7q11.23 duplication
GSM1624868	Dup7			7q11.23 duplication
GSM1624869	Dup7			7q11.23 duplication
GSM1624870	Dup7			7q11.23 duplication
GSM1624871	Dup7			7q11.23 duplication
MS0433	Floating Harbour syndrome	m	12	SRCAP sequence testing: p.Arg2444*
MS0434	Floating Harbour syndrome	f	15	SRCAP sequence testing: p.Arg2444*
MS0435	Floating Harbour syndrome	m	5	SRCAP sequence testing: p.Arg2444*
MS0436	Floating Harbour syndrome	f	40	SRCAP sequence testing: p.Arg2748*
MS0437	Floating Harbour syndrome	f	5	SRCAP sequence testing: p.Arg2444*
MS0439	Floating Harbour syndrome	f	6	SRCAP sequence testing: p.Arg2444*
MS0440	Floating Harbour syndrome	f	35	SRCAP sequence testing: p.Arg2444*
MS0441	Floating Harbour syndrome	f	15	SRCAP sequence testing: p.Arg2444*
MS0442	Floating Harbour syndrome	f	42	SRCAP sequence testing: p.Arg2444*
MS0443	Floating Harbour syndrome	m	12	SRCAP sequence testing: p.Gln2407Argfs*35
MS0444	Floating Harbour syndrome	m	10	SRCAP sequence testing: p.Ala2440Serfs*3
MS0445	Floating Harbour syndrome	m	4	SRCAP sequence testing: p.Gln2517Lysfs*5
MS0446	Floating Harbour syndrome	f	10	SRCAP sequence testing: p.Arg2444*
MS0447	Floating Harbour syndrome	f	8	SRCAP sequence testing: p.2435*
MS0449	Floating Harbour syndrome	f	8	SRCAP sequence testing: p.Glu2389*
MS0450	Floating Harbour syndrome	f	6	SRCAP sequence testing: p.Gln2407*
MS0451	Floating Harbour syndrome	m	4	SRCAP sequence testing: p.Ser2706*
MS0452	Floating Harbour syndrome	f	6	SRCAP sequence testing: p.Arg2428Profs*15
MS0458	Fragile X syndrome	m
MS0458	Fragile X syndrome	m
MS0499	Fragile X syndrome	m	27
MS0500	Fragile X syndrome	m	12
MS0501	Fragile X syndrome	m	42
MS0502	Fragile X syndrome	m	28
MS0503	Fragile X syndrome	m	13
MS0504	Fragile X syndrome	m	31
MS0505	Fragile X syndrome	m	15
MS0506	Fragile X syndrome	m	23
MS0507	Fragile X syndrome	m	17
MS0508	Fragile X syndrome	m	21
MS0509	Fragile X syndrome	m	30
MS0510	Fragile X syndrome	m	28
MS0540	Fragile X syndrome	m	32
MS0541	Fragile X syndrome	m	21
MS0542	Fragile X syndrome	m	29
MS0543	Fragile X syndrome	m	33
MS0544	Fragile X syndrome	m	17
MS0545	Fragile X syndrome	m	29
MS0546	Fragile X syndrome	m	25
MS0547	Fragile X syndrome	m	25
MS0548	Fragile X syndrome	m	17
MS0549	Fragile X syndrome	m	33
MS0550	Fragile X syndrome	m	36
MS0551	Fragile X syndrome	m	29
MS0552	Fragile X syndrome	m	19
MS0553	Fragile X syndrome	m	20
MS0554	Fragile X syndrome	m	41
MS0556	Fragile X syndrome	m	31
MS0558	Fragile X syndrome	m	27
MS0560	Fragile X syndrome	m	17
MS0562	Fragile X syndrome	m	15
MS0575	Fragile X syndrome	m	14
MS1410	Fragile X syndrome	m
MS1412	Fragile X syndrome	m
MS1421	Fragile X syndrome	m
GSM3227769	Kabuki syndrome	f		KMT2D c.1329_1332del (p.P443fs10)
GSM3227770	Kabuki syndrome	f		KMT2D c.6595delT (p.Y2199fs)
GSM3227774	Kabuki syndrome	m		KMT2D c.15920_15921insT (p.S5307fs49)
GSM3227777	Kabuki syndrome	m		KMT2D c.13207_13208del (p.N4403fs39)
GSM3227778	Kabuki syndrome	m		KMT2D c.C12304T (p.Q4102X)
GSM3227787	Kabuki syndrome	m		KMT2D c.14515+1G>T
GSM3227790	Kabuki syndrome	f		KMT2D c.C12268T (p.Q4090X)
GSM3227792	Kabuki syndrome	f		KMT2D c.5124_5125del (p.T1708fs21)
KMT2D-1	Kabuki syndrome	f	15	KMT2D c.15061C>T (p.Arg5021*)
KMT2D-10	Kabuki syndrome	m	6	KMT2D c.4135_4136delA (p.Met1379Valfs*52)
KMT2D-11	Kabuki syndrome	m	16	KMT2D c.11710C>T (p.Gln3904*)
KMT2D-2	Kabuki syndrome	m	1	KMT2D c.16318delG (p.Glu5440Argfs*16)
KMT2D-22	Kabuki syndrome			KMT2D c.11158C>T (p.Gln3720*)
KMT2D-25	Kabuki syndrome			KMT2D c.16521+1G>T
KMT2D-26	Kabuki syndrome			KMT2D c.1940dupC (p.Pro648Thrfs*2)
KMT2D-29	Kabuki syndrome			KMT2D c.15088C>T (p.Arg5030Cys)
KMT2D-3	Kabuki syndrome	m	18	KMT2D c.15030dupA (p.Glu5011Argfs*13)
KMT2D-30	Kabuki syndrome			KMT2D c.5135delA (p.Lys1712Argfs*10)
KMT2D-32	Kabuki syndrome			KMT2D c.16052G>A (p.Arg5351Gln)
KMT2D-33	Kabuki syndrome			KMT2D c.11203C>T (p.Gln3735*)
KMT2D-36	Kabuki syndrome			KMT2D c.15536G>A (p.Arg5179His)
KMT2D-4	Kabuki syndrome	f	16	KMT2D c.8172_8173delC (p.Phe2724Glnfs*5)
KMT2D-5	Kabuki syndrome	m	15	KMT2D c.6595delT (p.Tyr2199Ilefs*65)
KMT2D-6	Kabuki syndrome	m	11	KMT2D c.14055-14056delCA (p.His4685Glnfs*4)
KMT2D-7	Kabuki syndrome	m	14	KMT2D c.6295C>T (p.Arg2099*)
KMT2D-8	Kabuki syndrome	m	20	KMT2D c.4135_4136delA (p.Met1379Valfs*52)
KMT2D-9	Kabuki syndrome	m	18	KMT2D c.12592C>T (p.Arg4198*)
MS0608	Kabuki syndrome	m	7	KMT2D c.1801_1822dup 22
MS0711	Kabuki syndrome	f	6.7	KMT2D c.13059delG
MS0713	Kabuki syndrome	m	1.9	KMT2D c.839+1delG
MS0719	Kabuki syndrome	f	3.9	KMT2D c.15844C>T (p.R5282X )
MS0720	Kabuki syndrome	m	21.6	KMT2D c.16294C>T (p.R5432W)
MS0721	Kabuki syndrome	f	0	KMT2D c.8488C>T (p.R2830X )
MS0738	Kabuki syndrome	f	3.8	KMT2D c.4168dupG
MS0740	Kabuki syndrome	m	4.3	KMT2D c.15289C>T (p.R5097X )
MS0744	Kabuki syndrome	m	2.6	KMT2D c.4419-2A>G
MS0774	Kabuki syndrome	f	16.6	KMT2D c.548delC
MS0776	Kabuki syndrome	f	3.3	KMT2D c.7411C>T (p.R2471X )
MS0778	Kabuki syndrome	f	24.1	KMT2D c.1966dupC
MS0782	Kabuki syndrome	f	9.5	KMT2D c.6200delA
MS0783	Kabuki syndrome	f	9.3	KMT2D c.7933C>T (p.R2645X)
MS0784	Kabuki syndrome	f	5.8	KMT2D c.13450C>T (p.R4484X )
MS0786	Kabuki syndrome	f	19.1	KMT2D c.16048A>T (p.K5350X)
MS0787	Kabuki syndrome	m	7.1	KMT2D c.10201C>T (p.Q3401X )
MS0788	Kabuki syndrome	m	3.4	KMT2D c.16360C>T (p.R5454X )
MS0790	Kabuki syndrome	m	3.1	KMT2D c.8692C>T (p.Q2898X )
MS0792	Kabuki syndrome	f	4.1	KMT2D c.14878C>T (p.R4960X )
MS0793	Kabuki syndrome	f	23.1	KMT2D c.6265A>T (p.K2089X )
MS0794	Kabuki syndrome	f	6.9	KMT2D c.10740+1G>A
MS0795	Kabuki syndrome	m	2.2	KMT2D c.13652T>A (p.L4551X )
MS0796	Kabuki syndrome	f	1	KMT2D c.11596C>T (p.Q3866X )
MS1028	Kabuki syndrome	m	4.3	KMT2D c.2185A>G, p.K729E
MS1236	Kabuki syndrome	f	5.5	KMT2D c.15785-10T>G
MS0118	Prader Willi syndrome	f	0.1
MS0398	Prader Willi syndrome	f
MS0600	Prader Willi syndrome	f	3.5
MS0601	Prader Willi syndrome	m	10
MS0602	Prader Willi syndrome	f	14
MS0603	Prader Willi syndrome	m	12.5
MS0605	Prader Willi syndrome	f	12.5
MS0607	Prader Willi syndrome	f	22
MS0610	Prader Willi syndrome	f	1.5
MS1414	Prader Willi syndrome
MS1422	Prader Willi syndrome
GSM1338101	Silver Russel syndrome	f	8.3
GSM1338106	Silver Russel syndrome	m
GSM1338108	Silver Russel syndrome	f
GSM1338109	Silver Russel syndrome	f	4.3
GSM1338110	Silver Russel syndrome	m	2.4
GSM1338111	Silver Russel syndrome	f	6.6
GSM1338112	Silver Russel syndrome	m	7.3
GSM1338113	Silver Russel syndrome	m
GSM1338114	Silver Russel syndrome	f
GSM1338115	Silver Russel syndrome	f	0.86
GSM1338116	Silver Russel syndrome	m	12
GSM1338117	Silver Russel syndrome	f	7.9
GSM1338118	Silver Russel syndrome	m	1.7
GSM1338119	Silver Russel syndrome	f	20.3
GSM1338120	Silver Russel syndrome	f	4.4
GSM1338121	Silver Russel syndrome	m	6.8
GSM1338122	Silver Russel syndrome	m	5.1
GSM1338123	Silver Russel syndrome	f	4.5
GSM2800663	Silver Russel syndrome	m		11p15
GSM2800664	Silver Russel syndrome	m		11p15
GSM2800665	Silver Russel syndrome	f		11p15
GSM2800666	Silver Russel syndrome	m		clinical
GSM2800667	Silver Russel syndrome	f		11p15
GSM2800668	Silver Russel syndrome	f		clinical
GSM2800669	Silver Russel syndrome	f		clinical
GSM2800670	Silver Russel syndrome	m		UPD(7)mat
GSM2800671	Silver Russel syndrome	m		11p15
GSM2800672	Silver Russel syndrome	f		UPD(7)mat
GSM2800673	Silver Russel syndrome	f		clinical
GSM2800674	Silver Russel syndrome	m		11p15
GSM2800675	Silver Russel syndrome	m		11p15
GSM2800676	Silver Russel syndrome	f		11p15
GSM2800677	Silver Russel syndrome	f		11p15
GSM2800678	Silver Russel syndrome	f		clinical
GSM2800679	Silver Russel syndrome	m		11p15
GSM2800680	Silver Russel syndrome	f		clinical
GSM2800681	Silver Russel syndrome	m		11p15
GSM2800682	Silver Russel syndrome	f		UPD(7)mat
GSM2800683	Silver Russel syndrome	m		11p15
GSM2800684	Silver Russel syndrome	f		UPD(7)mat
GSM2800685	Silver Russel syndrome	m		11p15
GSM2800686	Silver Russel syndrome	m		clinical
GSM2800687	Silver Russel syndrome	f		11p15
GSM2800688	Silver Russel syndrome	f		UPD(7)mat
GSM2800689	Silver Russel syndrome	f		clinical
GSM2800690	Silver Russel syndrome	f		UPD(7)mat
GSM2800691	Silver Russel syndrome	f		clinical
GSM2800692	Silver Russel syndrome	f		clinical
GSM2800693	Silver Russel syndrome	m		11p15
GSM2800694	Silver Russel syndrome	m		11p15
GSM2800695	Silver Russel syndrome	f		UPD(7)pat
GSM2800696	Silver Russel syndrome	m		clinical
GSM2800697	Silver Russel syndrome	m		clinical
GSM2800698	Silver Russel syndrome	f		UPD(7)mat
GSM2800699	Silver Russel syndrome	m		clinical
GSM2800700	Silver Russel syndrome	m		11p15
GSM2800701	Silver Russel syndrome	m		11p15
GSM2800702	Silver Russel syndrome	f		clinical
GSM2800703	Silver Russel syndrome	m		UPD(7)mat
GSM2800704	Silver Russel syndrome	m		UPD(7)mat
GSM2800705	Silver Russel syndrome	f		11p15
GSM2800706	Silver Russel syndrome	f		11p15
GSM2800707	Silver Russel syndrome	m		UPD(7)mat
MS1402	Silver Russel syndrome			UPD11
GSM1624832	Williams syndrome
GSM1624833	Williams syndrome
GSM1624834	Williams syndrome
GSM1624835	Williams syndrome
GSM1624836	Williams syndrome
GSM1624837	Williams syndrome
GSM1624838	Williams syndrome
GSM1624839	Williams syndrome
GSM1624840	Williams syndrome
GSM1624841	Williams syndrome
GSM1624842	Williams syndrome
GSM1624843	Williams syndrome
GSM1624844	Williams syndrome
GSM1624845	Williams syndrome
GSM1624856	Williams syndrome
GSM1624857	Williams syndrome
GSM1624858	Williams syndrome
GSM1624859	Williams syndrome
GSM1624860	Williams syndrome
GSM1624861	Williams syndrome
MS1417	Williams syndrome	m	48
Proband80	Williams syndrome	m
