# Supplementary material for: A genome-wide DNA methylation signature for SETD1B-related syndrome
Source: Clin Epigenetics. 2019 Nov 4;11:156. doi: 10.1186/s13148-019-0749-3 (PMC6830011; doi:10.1186/s13148-019-0749-3)
Supplement: Supplementary file 6 — Additional file 6: Table S6. Contains adjusted P-values for M values and empirical p-values for 3340 significant differentially methylated CpGs calculated in the SETD1B-related group analysis and permutation analysis, respectively. [file 13148_2019_749_MOESM6_ESM.xlsx]

## Sheet: Blad1
CpG	adj.P.Val_M	p_val_empirical
cg10716648	5.00766e-26	0.0001
cg09411730	8.06141e-23	0.0001
cg07839313	9.66244e-23	0.0001
cg00660989	1.34346e-22	0.0001
cg06230948	1.83789e-22	0.0001
cg07985890	1.83789e-22	0.0001
cg17156534	6.12167e-22	0.0001
cg21096966	1.02518e-21	0.0001
cg13680696	6.65564e-21	0.0001
cg07572052	1.74181e-20	0.0001
cg21869046	3.04414e-20	0.0001
cg10980598	5.18067e-20	0.0001
cg19905587	7.60057e-20	0.0001
cg04145264	8.06337e-20	0.0001
cg25628310	1.10223e-19	0.0001
cg11416874	1.2933e-19	0.0001
cg00853733	3.00006e-19	0.0001
cg21461470	3.00006e-19	0.0001
cg21577472	3.31226e-19	0.0001
cg00506062	6.9737e-19	0.0001
cg12603554	9.8844e-19	0.0001
cg13985198	1.26649e-18	0.0001
cg08117800	1.27629e-18	0.0001
cg20500085	1.28924e-18	0.0001
cg05313153	1.31056e-18	0.0001
cg10626950	1.41744e-18	0.0001
cg10942898	1.41744e-18	0.0001
cg08992565	2.07325e-18	0.0001
cg27635394	2.07325e-18	0.0001
cg11186862	2.86916e-18	0.0001
cg02993991	7.8306e-18	0.0001
cg00551609	1.28666e-17	0.0001
cg26857837	1.28666e-17	0.0001
cg18918417	1.41983e-17	0.0001
cg25103895	1.4466e-17	0.0001
cg01453052	1.49538e-17	0.0001
cg03204139	1.55836e-17	0.0001
cg02905828	2.43527e-17	0.0001
cg07529834	3.4669e-17	0.0001
cg22417733	4.69893e-17	0.0001
cg11489251	4.88354e-17	0.0001
cg10586255	5.0654e-17	0.0001
cg24906310	1.10558e-16	0.0001
cg00159523	1.13713e-16	0.0001
cg00875541	1.2549e-16	0.0001
cg14236665	1.39503e-16	0.0001
cg14960293	1.39503e-16	0.0001
cg15380173	1.39503e-16	0.0001
cg14207833	1.60892e-16	0.0001
cg20959174	1.60892e-16	0.0001
cg08751352	2.18341e-16	0.0001
cg22595230	2.64195e-16	0.0001
cg15234492	2.75148e-16	0.0001
cg18019132	3.07917e-16	0.0001
cg22897141	3.08533e-16	0.0001
cg04666465	3.14324e-16	0.0001
cg07177756	3.64295e-16	0.0001
cg27162705	3.65349e-16	0.0001
cg20684110	5.18217e-16	0.0001
cg04411156	8.36512e-16	0.0001
cg13665871	8.81842e-16	0.0001
cg12517401	1.05629e-15	0.0001
cg11748187	1.06305e-15	0.0001
cg01083131	1.12265e-15	0.0001
cg03418428	1.22337e-15	0.0001
cg05405872	1.36704e-15	0.0001
cg23878241	1.46866e-15	0.0001
cg03078400	1.7998e-15	0.0001
cg17985311	1.85478e-15	0.0001
cg18696027	1.85478e-15	0.0001
cg21162977	1.87021e-15	0.0001
cg25860598	2.16651e-15	0.0001
cg00046744	2.70887e-15	0.0001
cg15318143	3.12413e-15	0.0001
cg02795603	3.73631e-15	0.0001
cg03916421	4.07293e-15	0.0001
cg22721579	4.14219e-15	0.0001
cg08463024	4.49375e-15	0.0001
cg16619991	5.70443e-15	0.0001
cg05881455	6.47001e-15	0.0001
cg01858866	6.84454e-15	0.0001
cg01420254	7.14113e-15	0.0001
cg12946660	7.24271e-15	0.0001
cg07972954	8.49115e-15	0.0001
cg20698421	8.49115e-15	0.0001
cg26066349	8.77853e-15	0.0001
cg12072904	9.53774e-15	0.0001
cg20090430	1.17719e-14	0.0001
cg01268022	1.31651e-14	0.0001
cg07285708	1.58987e-14	0.0001
cg05036929	1.60906e-14	0.0001
cg21105477	1.66269e-14	0.0001
cg12474798	1.76942e-14	0.0001
cg24146125	2.01324e-14	0.0001
cg11439393	2.0391e-14	0.0001
cg08067637	2.28543e-14	0.0001
cg08855861	2.28543e-14	0.0001
cg09203563	2.64896e-14	0.0001
cg18930100	3.07884e-14	0.0001
cg11919694	3.09133e-14	0.0001
cg06005318	3.24132e-14	0.0001
cg11781718	3.41264e-14	0.0001
cg20324858	3.70613e-14	0.0001
cg00930606	3.90083e-14	0.0001
cg21250296	3.95896e-14	0.0001
cg08565469	4.00515e-14	0.0001
cg07150862	4.18782e-14	0.0001
cg26264318	4.36603e-14	0.0001
cg22455082	6.04106e-14	0.0001
cg25937230	6.80489e-14	0.0001
cg09796457	8.44366e-14	0.0001
cg09022607	8.67661e-14	0.0001
cg02974977	9.1168e-14	0.0001
cg12666336	9.15853e-14	0.0001
cg23197460	9.15853e-14	0.0001
cg20773320	1.0774e-13	0.0001
cg23960707	1.1666e-13	0.0001
cg18011080	1.18347e-13	0.0001
cg12681972	1.24049e-13	0.0001
cg00631939	1.37361e-13	0.0001
cg26654573	1.39493e-13	0.0001
cg20474675	1.40945e-13	0.0001
cg06556266	1.46289e-13	0.0001
cg21082879	1.46289e-13	0.0001
cg24631162	1.46289e-13	0.0001
cg16225498	1.61987e-13	0.0001
cg22706883	1.61987e-13	0.0001
cg05576949	1.67948e-13	0.0001
cg07529210	1.67948e-13	0.0001
cg09367425	1.67948e-13	0.0001
cg01639635	1.72626e-13	0.0001
cg11342453	1.86019e-13	0.0001
cg00056066	1.86085e-13	0.0001
cg26953232	1.86085e-13	0.0001
cg01268763	1.91865e-13	0.0001
cg09298159	1.95163e-13	0.0001
cg00007076	1.97075e-13	0.0001
cg01005506	2.03153e-13	0.0001
cg21869609	2.04773e-13	0.0001
cg01294327	2.08097e-13	0.0001
cg17478749	2.08097e-13	0.0001
cg11339849	2.35112e-13	0.0001
cg03443331	2.525e-13	0.0001
cg18998365	2.525e-13	0.0001
cg22797892	2.525e-13	0.0001
cg05789925	2.53283e-13	0.0001
cg06937549	2.66532e-13	0.0001
cg25080206	2.70482e-13	0.0001
cg02221866	2.79807e-13	0.0001
cg16236893	3.10145e-13	0.0001
cg08436828	3.17203e-13	0.0001
cg14024579	3.38239e-13	0.0001
cg22622440	3.38239e-13	0.0001
cg03515869	3.44144e-13	0.0001
cg08662265	3.51782e-13	0.0001
cg12436851	3.59863e-13	0.0001
cg19900050	3.73855e-13	0.0001
cg24960291	4.09989e-13	0.0001
cg12140144	4.22086e-13	0.0001
cg06990272	4.23391e-13	0.0001
cg01695279	4.66271e-13	0.0001
cg19203115	4.66271e-13	0.0001
cg01287555	4.76282e-13	0.0001
cg14080585	5.26707e-13	0.0001
cg11819305	5.47353e-13	0.0001
cg26149875	6.07871e-13	0.0001
cg08677140	6.38857e-13	0.0001
cg07117760	6.53222e-13	0.0001
cg21249371	6.53222e-13	0.0001
cg22025478	6.53222e-13	0.0001
cg15387132	6.92296e-13	0.0001
cg03700024	7.15622e-13	0.0001
cg03068497	8.03612e-13	0.0001
cg10828401	8.03612e-13	0.0001
cg01837574	8.23762e-13	0.0001
cg05557932	8.31303e-13	0.0001
cg17932407	8.87684e-13	0.0001
cg07097417	8.9265e-13	0.0001
cg12420283	8.9265e-13	0.0001
cg12048425	9.40201e-13	0.0001
cg22128197	1.04316e-12	0.0001
cg06670599	1.07853e-12	0.0001
cg27370993	1.2552e-12	0.0001
cg18274559	1.25821e-12	0.0001
cg13541527	1.28134e-12	0.0001
cg25740200	1.29769e-12	0.0001
cg11700584	1.30207e-12	0.0001
cg20237752	1.30571e-12	0.0001
cg24124954	1.37417e-12	0.0001
cg22672242	1.49157e-12	0.0001
cg05512310	1.67918e-12	0.0001
cg21411710	1.69191e-12	0.0001
cg04993448	1.78056e-12	0.0001
cg16416715	1.86976e-12	0.0001
cg15090440	1.91057e-12	0.0001
cg11200656	1.9335e-12	0.0001
cg06901890	1.96606e-12	0.0001
cg11773468	2.38422e-12	0.0001
cg24388946	2.38422e-12	0.0001
cg13911707	2.67114e-12	0.0001
cg18405140	2.88473e-12	0.0001
cg26893795	2.93859e-12	0.0001
cg07217350	3.09989e-12	0.0001
cg16387254	3.09989e-12	0.0001
cg12834356	3.12025e-12	0.0001
cg05654364	3.39821e-12	0.0001
cg25520710	3.6156e-12	0.0001
cg19341652	3.72934e-12	0.0001
cg03066986	4.6992e-12	0.0001
cg21179831	4.82212e-12	0.0001
cg14214321	5.12562e-12	0.0001
cg04740205	5.39568e-12	0.0001
cg01654446	5.41258e-12	0.0001
cg24147428	5.77219e-12	0.0001
cg26596719	5.9064e-12	0.0001
cg27038428	5.9064e-12	0.0001
cg07403910	5.96179e-12	0.0001
cg11647493	6.33851e-12	0.0001
cg15612131	6.45021e-12	0.0001
cg22837791	6.82426e-12	0.0001
cg17025683	6.90014e-12	0.0001
cg06136199	6.93247e-12	0.0001
cg09639236	7.01954e-12	0.0001
cg16988810	7.02617e-12	0.0001
cg00300298	7.1112e-12	0.0001
cg12670305	8.17613e-12	0.0001
cg03620975	8.20941e-12	0.0001
cg12060786	8.70679e-12	0.0001
cg04852443	8.85831e-12	0.0001
cg17452615	9.08294e-12	0.0001
cg04431133	9.29806e-12	0.0001
cg22995106	9.378e-12	0.0001
cg04420723	9.78427e-12	0.0001
cg04232793	9.9314e-12	0.0001
cg07141002	1.07237e-11	0.0001
cg00734567	1.1121e-11	0.0001
cg10589813	1.14392e-11	0.0001
cg02064724	1.18005e-11	0.0001
cg18276263	1.25571e-11	0.0001
cg10234506	1.27627e-11	0.0001
cg26797219	1.30012e-11	0.0001
cg26799474	1.30012e-11	0.0001
cg06857094	1.39043e-11	0.0001
cg21613307	1.39043e-11	0.0001
cg12364755	1.46138e-11	0.0001
cg17531288	1.50237e-11	0.0001
cg25540816	1.50464e-11	0.0001
cg01209023	1.50605e-11	0.0001
cg00496272	1.50987e-11	0.0001
cg13866230	1.51901e-11	0.0001
cg00988037	1.52517e-11	0.0001
cg24275356	1.56077e-11	0.0001
cg11166877	1.57918e-11	0.0001
cg12627844	1.60753e-11	0.0001
cg15572656	1.61753e-11	0.0001
cg24127061	1.71432e-11	0.0001
cg16875104	1.86172e-11	0.0001
cg15233611	1.90812e-11	0.0001
cg07733851	2.05687e-11	0.0001
cg24332685	2.10951e-11	0.0001
cg05628702	2.1129e-11	0.0001
cg08935122	2.16345e-11	0.0001
cg16419533	2.3587e-11	0.0001
cg05174975	2.40503e-11	0.0001
cg06191495	2.40503e-11	0.0001
cg05803032	2.43057e-11	0.0001
cg05690394	2.47648e-11	0.0001
cg11004284	2.59152e-11	0.0001
cg22851200	2.59152e-11	0.0001
cg00691240	2.63371e-11	0.0001
cg15020580	2.67893e-11	0.0001
cg00811020	2.77324e-11	0.0001
cg00579960	2.79759e-11	0.0001
cg05194618	2.81924e-11	0.0001
cg12439789	2.9453e-11	0.0001
cg26058502	2.96464e-11	0.0001
cg06740650	2.97711e-11	0.0001
cg09043250	3.05531e-11	0.0001
cg17591725	3.15678e-11	0.0001
cg27000944	3.15678e-11	0.0001
cg03849927	3.23468e-11	0.0001
cg27615603	3.25525e-11	0.0001
cg26503877	3.2623e-11	0.0001
cg18137450	3.31162e-11	0.0001
cg25615944	3.31162e-11	0.0001
cg01103827	3.32229e-11	0.0001
cg25538421	3.38127e-11	0.0001
cg23404877	3.51545e-11	0.0001
cg02205391	3.60262e-11	0.0001
cg02932780	3.60262e-11	0.0001
cg00673006	3.6417e-11	0.0001
cg10106903	3.98506e-11	0.0001
cg12722652	3.9889e-11	0.0001
cg13196143	4.17298e-11	0.0001
cg11241677	4.21167e-11	0.0001
cg25714573	4.21167e-11	0.0001
cg24142464	4.28685e-11	0.0001
cg13257412	4.3583e-11	0.0001
cg12800803	4.45038e-11	0.0001
cg05355172	4.48383e-11	0.0001
cg07793808	4.49657e-11	0.0001
cg27165794	4.753e-11	0.0001
cg17183362	4.80183e-11	0.0001
cg08198377	4.83561e-11	0.0001
cg16592434	4.83561e-11	0.0001
cg02583484	5.12717e-11	0.0001
cg16568360	5.32961e-11	0.0001
cg01885559	5.80811e-11	0.0001
cg20967006	5.95157e-11	0.0001
cg15616915	6.28158e-11	0.0001
cg05067912	6.42552e-11	0.0001
cg20426710	7.52677e-11	0.0001
cg24252966	7.65578e-11	0.0001
cg02512524	7.73385e-11	0.0001
cg07882648	7.82478e-11	0.0001
cg01672322	7.95477e-11	0.0001
cg16963852	7.95477e-11	0.0001
cg09439599	7.99705e-11	0.0001
cg24780570	8.92757e-11	0.0001
cg08841239	9.0522e-11	0.0001
cg11073255	9.17314e-11	0.0001
cg19170156	9.21508e-11	0.0001
cg09238801	9.34884e-11	0.0001
cg18806997	9.34884e-11	0.0001
cg02409169	9.69992e-11	0.0001
cg10281728	9.75182e-11	0.0001
cg08327371	1.04018e-10	0.0001
cg19861823	1.07795e-10	0.0001
cg27507960	1.13267e-10	0.0001
cg14735861	1.17177e-10	0.0001
cg11857514	1.20601e-10	0.0001
cg02342258	1.32742e-10	0.0001
cg18642234	1.33371e-10	0.0001
cg12795893	1.40807e-10	0.0001
cg03876340	1.4397e-10	0.0001
cg17009869	1.49277e-10	0.0001
cg01808879	1.49439e-10	0.0001
cg08469147	1.50774e-10	0.0001
cg16979252	1.56272e-10	0.0001
cg24276069	1.65768e-10	0.0001
cg16475038	1.68656e-10	0.0001
cg16633058	1.80846e-10	0.0001
cg10861637	1.81712e-10	0.0001
cg11927233	1.87655e-10	0.0001
cg08279625	1.98888e-10	0.0001
cg13399234	1.99803e-10	0.0001
cg23565821	2.03239e-10	0.0001
cg14562296	2.1027e-10	0.0001
cg11469540	2.25512e-10	0.0001
cg07954706	2.32399e-10	0.0001
cg23588204	2.35304e-10	0.0001
cg01495895	2.38388e-10	0.0001
cg11305121	2.38614e-10	0.0001
cg06294803	2.42627e-10	0.0001
cg02257550	2.48029e-10	0.0001
cg07774299	2.49214e-10	0.0001
cg02681370	2.56205e-10	0.0001
cg23983173	2.62526e-10	0.0001
cg01701585	2.65694e-10	0.0001
cg20741185	2.75582e-10	0.0001
cg05543179	2.77542e-10	0.0001
cg17709718	2.8076e-10	0.0001
cg04976215	2.85872e-10	0.0001
cg27315497	2.85872e-10	0.0001
cg22441770	2.96715e-10	0.0001
cg01419469	3.14808e-10	0.0001
cg16534142	3.26377e-10	0.0001
cg11210343	3.59573e-10	0.0001
cg21491092	3.64713e-10	0.0001
cg17817445	3.74545e-10	0.0001
cg14715602	3.75804e-10	0.0001
cg20674424	3.8269e-10	0.0001
cg11796996	3.9054e-10	0.0001
cg17412302	4.12043e-10	0.0001
cg22904815	4.38346e-10	0.0001
cg12589538	4.76222e-10	0.0001
cg22006825	4.82283e-10	0.0001
cg15267384	5.02412e-10	0.0001
cg10424530	5.32072e-10	0.0001
cg21649604	5.35823e-10	0.0001
cg13310076	5.37179e-10	0.0001
cg16449161	5.41369e-10	0.0001
cg13046524	5.52269e-10	0.0001
cg15130459	5.53964e-10	0.0001
cg08683263	5.78594e-10	0.0001
cg01869186	5.83619e-10	0.0001
cg07742396	5.9053e-10	0.0001
cg03785755	6.23122e-10	0.0001
cg23131026	6.23122e-10	0.0001
cg18638857	6.2805e-10	0.0001
cg18459223	6.3745e-10	0.0001
cg16911115	6.70751e-10	0.0001
cg08048577	6.86204e-10	0.0001
cg14782678	7.02843e-10	0.0001
cg05199755	7.096e-10	0.0001
cg05211920	7.32732e-10	0.0001
cg03717364	7.65695e-10	0.0001
cg06870040	7.65695e-10	0.0001
cg25136326	7.7546e-10	0.0001
cg04463649	8.26324e-10	0.0001
cg19179025	8.34834e-10	0.0001
cg06359132	8.49929e-10	0.0001
cg14646311	8.63347e-10	0.0001
cg07692489	8.7637e-10	0.0001
cg16173308	8.90234e-10	0.0001
cg19516279	8.9059e-10	0.0001
cg11367973	8.93471e-10	0.0001
cg23774780	9.27635e-10	0.0001
cg11459681	9.36093e-10	0.0001
cg23887746	9.46173e-10	0.0001
cg07027613	9.49579e-10	0.0001
cg03157040	9.88307e-10	0.0001
cg04777971	1.05787e-09	0.0001
cg16837338	1.06115e-09	0.0001
cg22321764	1.12395e-09	0.0001
cg03945538	1.12776e-09	0.0005
cg02608054	1.13479e-09	0.0001
cg12104246	1.15543e-09	0.0001
cg21429551	1.15543e-09	0.0001
cg27498980	1.15543e-09	0.0001
cg07793148	1.15716e-09	0.0001
cg13046742	1.15987e-09	0.0001
cg20299744	1.15987e-09	0.0001
cg03534375	1.19568e-09	0.0001
cg10278102	1.28036e-09	0.0001
cg06580033	1.32063e-09	0.0001
cg04599946	1.33525e-09	0.0001
cg09156597	1.35949e-09	0.0001
cg19843353	1.37784e-09	0.0001
cg24818562	1.42644e-09	0.0001
cg17783244	1.45843e-09	0.0001
cg13983442	1.5532e-09	0.0001
cg22744818	1.5532e-09	0.0001
cg16733993	1.58281e-09	0.0001
cg10364115	1.66611e-09	0.0001
cg02311456	1.71131e-09	0.0001
cg27542454	1.77357e-09	0.0001
cg13917964	1.80693e-09	0.0001
cg13003054	1.99625e-09	0.0001
cg25618424	2.02475e-09	0.0001
cg13522406	2.05239e-09	0.0001
cg09504313	2.10603e-09	0.0001
cg14154859	2.11287e-09	0.0001
cg17736443	2.11447e-09	0.0001
cg05734456	2.13223e-09	0.0001
cg17543511	2.19116e-09	0.0001
cg02578470	2.23192e-09	0.0001
cg05257610	2.23192e-09	0.0001
cg20920983	2.24691e-09	0.0001
cg18405341	2.25253e-09	0.0001
cg07275218	2.29124e-09	0.0001
cg07478773	2.33639e-09	0.0001
cg00398510	2.4186e-09	0.0001
cg14157525	2.45981e-09	0.0001
cg03929442	2.50042e-09	0.0001
cg19246761	2.55527e-09	0.0001
cg04659729	2.60075e-09	0.0001
cg03176996	2.64989e-09	0.0001
cg01553433	2.74905e-09	0.0001
cg12699156	2.75967e-09	0.0001
cg24046474	2.78348e-09	0.0001
cg00922110	2.79132e-09	0.0001
cg00415065	2.89805e-09	0.0001
cg05326756	2.92258e-09	0.0001
cg22841667	2.93405e-09	0.0001
cg01389728	2.97292e-09	0.0001
cg06367459	2.98112e-09	0.0001
cg07419703	3.08769e-09	0.0001
cg23361275	3.19508e-09	0.0001
cg26390495	3.19508e-09	0.0001
cg00658740	3.21474e-09	0.0001
cg03482593	3.21474e-09	0.0001
cg20544307	3.21474e-09	0.0001
cg27291385	3.21636e-09	0.0001
cg21799473	3.22534e-09	0.0001
cg06933525	3.2385e-09	0.0001
cg08152064	3.24951e-09	0.0001
cg27229100	3.29948e-09	0.0001
cg11002698	3.3725e-09	0.0001
cg08754067	3.40256e-09	0.0001
cg16704889	3.4035e-09	0.0001
cg04118124	3.45525e-09	0.0001
cg05151185	3.55462e-09	0.0001
cg05743112	3.55473e-09	0.0001
cg04726821	3.63441e-09	0.0001
cg08712669	3.63441e-09	0.0001
cg12793711	3.63441e-09	0.0001
cg13344095	3.74704e-09	0.0001
cg15593587	3.74704e-09	0.0005
cg09927569	3.88269e-09	0.0001
cg23384027	3.88269e-09	0.0001
cg04800585	4.01496e-09	0.0001
cg14271729	4.22615e-09	0.0001
cg07620713	4.24122e-09	0.0001
cg01883777	4.31924e-09	0.0001
cg04359840	4.36211e-09	0.0001
cg02449103	4.37067e-09	0.0001
cg01188914	4.38678e-09	0.0001
cg18174678	4.42692e-09	0.0001
cg00071265	4.61271e-09	0.0001
cg07676709	4.61614e-09	0.0001
cg07211044	4.64535e-09	0.0001
cg01274122	4.66916e-09	0.0001
cg02247160	4.66916e-09	0.0001
cg02345399	4.66916e-09	0.0001
cg11039712	4.97608e-09	0.0001
cg27171682	5.00505e-09	0.0001
cg16466154	5.06206e-09	0.0001
cg05789250	5.09608e-09	0.0001
cg27130630	5.10931e-09	0.0001
cg13810727	5.13731e-09	0.0001
cg05512483	5.18244e-09	0.0001
cg06473363	5.30578e-09	0.0001
cg26092675	5.30578e-09	0.0001
cg02135151	5.31152e-09	0.0001
cg09760217	5.35358e-09	0.0001
cg26964117	5.35358e-09	0.0001
cg08100517	5.44564e-09	0.0001
cg01353646	5.62247e-09	0.0001
cg06330621	6.10234e-09	0.0001
cg14292572	6.19587e-09	0.0001
cg02921382	6.24368e-09	0.0001
cg04510085	6.27164e-09	0.0001
cg04378385	6.2792e-09	0.0001
cg01165387	6.31586e-09	0.0001
cg18883198	6.38483e-09	0.0001
cg20417154	6.5393e-09	0.0001
cg08034392	6.84915e-09	0.0001
cg06454226	6.8619e-09	0.0001
cg13836098	7.6194e-09	0.0001
cg10957895	7.63127e-09	0.0001
cg04320760	7.83954e-09	0.0001
cg22269164	7.86294e-09	0.0001
cg20786280	7.88339e-09	0.0001
cg24874555	8.00682e-09	0.0001
cg03958883	8.0747e-09	0.0001
cg12355843	8.2338e-09	0.0001
cg09141338	8.2606e-09	0.0001
cg27488503	8.3361e-09	0.0001
cg19961766	8.41277e-09	0.0001
cg09840667	8.47247e-09	0.0001
cg00935328	8.72148e-09	0.0001
cg16051361	9.21674e-09	0.0001
cg24996758	9.24776e-09	0.0001
cg01331992	9.68876e-09	0.0001
cg03935116	1.01694e-08	0.0001
cg07020001	1.01694e-08	0.0001
cg18712352	1.01694e-08	0.0001
cg18211066	1.03717e-08	0.0001
cg26723847	1.04168e-08	0.0001
cg20740299	1.05139e-08	0.0001
cg16246545	1.05959e-08	0.0001
cg04404543	1.09664e-08	0.0001
cg00360230	1.09845e-08	0.0001
cg07090356	1.09845e-08	0.0001
cg27241808	1.10402e-08	0.0001
cg03412411	1.11699e-08	0.0001
cg19426434	1.11704e-08	0.0001
cg26933683	1.14079e-08	0.0001
cg24669602	1.15051e-08	0.0001
cg01431482	1.16233e-08	0.0001
cg04099180	1.1808e-08	0.0001
cg01428071	1.19044e-08	0.0001
cg21990144	1.2267e-08	0.0001
cg03763950	1.25055e-08	0.0001
cg10068539	1.2569e-08	0.0001
cg00631221	1.26095e-08	0.0001
cg11638716	1.26135e-08	0.0001
cg07701237	1.26537e-08	0.0001
cg16245345	1.28308e-08	0.0001
cg06539679	1.31028e-08	0.0001
cg08327744	1.32333e-08	0.0001
cg17451586	1.35334e-08	0.0001
cg19419291	1.38345e-08	0.0001
cg26942169	1.45256e-08	0.0005
cg08255475	1.46729e-08	0.0001
cg04490655	1.48275e-08	0.0001
cg12177539	1.51108e-08	0.0001
cg15793354	1.52965e-08	0.0001
cg25158622	1.54536e-08	0.0001
cg27278843	1.55628e-08	0.0001
cg01667702	1.66521e-08	0.0001
cg20016023	1.67654e-08	0.0001
cg18449062	1.70034e-08	0.0001
cg27110548	1.72565e-08	0.0001
cg02745111	1.73386e-08	0.0001
cg18633060	1.75523e-08	0.0001
cg08927146	1.76897e-08	0.0001
cg21794419	1.88552e-08	0.0001
cg10786252	1.91435e-08	0.0001
cg15650298	1.91435e-08	0.0001
cg26276120	2.00152e-08	0.0001
cg14653977	2.0788e-08	0.0001
cg22726349	2.18051e-08	0.0001
cg03619472	2.24897e-08	0.0001
cg11051055	2.24897e-08	0.0001
cg13151425	2.3028e-08	0.0001
cg16001335	2.32727e-08	0.0001
cg01248445	2.38209e-08	0.0001
cg12928471	2.43414e-08	0.0001
cg20804756	2.50872e-08	0.0001
cg14921522	2.52819e-08	0.0001
cg26365668	2.54679e-08	0.0001
cg19602324	2.61319e-08	0.0001
cg09528056	2.67428e-08	0.0001
cg06713261	2.73108e-08	0.0001
cg18728631	2.7667e-08	0.0001
cg21385909	2.77787e-08	0.0001
cg00710286	2.88743e-08	0.0001
cg24781014	2.88743e-08	0.0001
cg07162320	2.9412e-08	0.0001
cg18487419	2.98277e-08	0.0001
cg22878489	3.05522e-08	0.0001
cg18123677	3.05591e-08	0.0001
cg20396557	3.07533e-08	0.0001
cg24803614	3.07533e-08	0.0001
cg18917177	3.10074e-08	0.0001
cg09314434	3.14479e-08	0.0001
cg14741228	3.18411e-08	0.0001
cg01496369	3.202e-08	0.0001
cg02967969	3.32508e-08	0.0001
cg14821257	3.32859e-08	0.0001
cg14179389	3.35113e-08	0.0001
cg15020502	3.39328e-08	0.0001
cg04665604	3.39981e-08	0.0001
cg15892280	3.51326e-08	0.0001
cg04117731	3.57202e-08	0.0001
cg11068468	3.5756e-08	0.0001
cg07389319	3.66369e-08	0.0001
cg07642463	3.68032e-08	0.0001
cg06585203	3.71668e-08	0.0001
cg09394621	3.74841e-08	0.0001
cg15613761	3.76927e-08	0.0001
cg20309353	3.83356e-08	0.0005
cg15318853	3.8606e-08	0.0001
cg06261208	3.89747e-08	0.0001
cg08963753	3.9632e-08	0.0001
cg22608655	3.98341e-08	0.0001
cg20622019	4.07332e-08	0.0001
cg22001807	4.22525e-08	0.0001
cg19205850	4.22868e-08	0.0001
cg08073033	4.30339e-08	0.0001
cg17384849	4.32241e-08	0.0001
cg06023345	4.39309e-08	0.0001
cg03103463	4.6784e-08	0.0001
cg01844176	4.83786e-08	0.0001
cg21125147	5.04651e-08	0.0001
cg19774402	5.31393e-08	0.0001
cg15595733	5.40693e-08	0.0001
cg09566177	5.40956e-08	0.0001
cg11809928	5.41574e-08	0.0001
cg02074380	5.43473e-08	0.0001
cg14504499	5.56797e-08	0.0001
cg26472910	5.61572e-08	0.0001
cg03435448	5.68771e-08	0.0001
cg06484167	5.72591e-08	0.0001
cg23231163	5.82824e-08	0.0001
cg12880995	5.92356e-08	0.0001
cg04286417	6.03871e-08	0.0001
cg01508045	6.07488e-08	0.0001
cg27637521	6.07488e-08	0.0001
cg00071872	6.1059e-08	0.0001
cg11453058	6.48772e-08	0.0001
cg16716078	6.53648e-08	0.0001
cg09640862	6.56086e-08	0.0001
cg10133500	6.56086e-08	0.0001
cg26780138	6.6762e-08	0.0001
cg01735049	6.72642e-08	0.0001
cg15754084	6.832e-08	0.0001
cg12148387	6.9724e-08	0.0001
cg06382930	6.99506e-08	0.0001
cg13340135	7.00279e-08	0.0001
cg01125463	7.20085e-08	0.0001
cg06279023	7.29241e-08	0.0001
cg19426731	7.37191e-08	0.0001
cg00146645	7.58383e-08	0.0001
cg00772091	7.61809e-08	0.0001
cg08623193	7.61809e-08	0.0001
cg03181300	7.71775e-08	0.0001
cg10676060	7.71775e-08	0.0001
cg13547237	7.93544e-08	0.0001
cg01340952	7.94644e-08	0.0001
cg07946633	7.94644e-08	0.0001
cg24303076	7.9555e-08	0.0001
cg04011671	7.99186e-08	0.0001
cg07109801	8.1807e-08	0.0001
cg10879244	8.1807e-08	0.0001
cg16476561	8.1807e-08	0.0001
cg05785598	8.24662e-08	0.0001
cg09677763	8.31669e-08	0.0001
cg27014354	8.3431e-08	0.0001
cg03437912	8.35903e-08	0.0001
cg09725874	8.35903e-08	0.0001
cg06872683	8.64163e-08	0.0001
cg24768817	8.67396e-08	0.0001
cg00933182	8.70737e-08	0.0001
cg08048279	8.98977e-08	0.0001
cg03812850	9.33465e-08	0.0001
cg02909068	9.44944e-08	0.0001
cg24134332	9.44944e-08	0.0001
cg19677893	9.45917e-08	0.0001
cg09151742	9.67544e-08	0.0001
cg06386814	9.73246e-08	0.0001
cg06709282	9.81708e-08	0.0001
cg03531211	9.86964e-08	0.0001
cg09451574	1.04466e-07	0.0001
cg14385233	1.04466e-07	0.0001
cg11130692	1.07648e-07	0.0001
cg03854765	1.08629e-07	0.0001
cg12276019	1.11184e-07	0.0001
cg14921166	1.11277e-07	0.0001
cg18092095	1.13298e-07	0.0001
cg02016764	1.14502e-07	0.0001
cg26234277	1.15189e-07	0.0001
cg17588983	1.15335e-07	0.0001
cg04197548	1.17385e-07	0.0001
cg07569918	1.17385e-07	0.0001
cg23754392	1.17475e-07	0.0001
cg10940418	1.1758e-07	0.0001
cg04599922	1.17765e-07	0.0001
cg09257735	1.18221e-07	0.0001
cg27506390	1.18221e-07	0.0005
cg21413402	1.23023e-07	0.0001
cg15790653	1.23268e-07	0.0001
cg12667716	1.26861e-07	0.0001
cg04573482	1.28258e-07	0.0001
cg24907525	1.28713e-07	0.0001
cg15411268	1.3067e-07	0.0001
cg21142149	1.30682e-07	0.0001
cg03691573	1.32494e-07	0.0001
cg20092036	1.32853e-07	0.0001
cg24913868	1.34866e-07	0.0001
cg00509357	1.3515e-07	0.0001
cg17538058	1.37199e-07	0.0001
cg27459121	1.39218e-07	0.0001
cg13127231	1.40127e-07	0.0001
cg00063111	1.40615e-07	0.0001
cg13063967	1.42917e-07	0.0001
cg19746343	1.4386e-07	0.0001
cg09296604	1.45322e-07	0.0001
cg22588854	1.45322e-07	0.0001
cg22742943	1.45322e-07	0.0001
cg03599590	1.47616e-07	0.0001
cg26886875	1.47917e-07	0.0001
cg07673230	1.48555e-07	0.0001
cg14374463	1.49325e-07	0.0001
cg08257257	1.49933e-07	0.0001
cg16565409	1.51285e-07	0.0001
cg20871412	1.54533e-07	0.0001
cg18070470	1.57681e-07	0.0001
cg15451248	1.64987e-07	0.0001
cg00849990	1.64993e-07	0.0001
cg07040244	1.6569e-07	0.0001
cg16290996	1.69576e-07	0.0001
cg11729363	1.70969e-07	0.0001
cg12155547	1.72287e-07	0.0001
cg26227044	1.72287e-07	0.0001
cg20033981	1.74917e-07	0.0001
cg12378760	1.75162e-07	0.0001
cg10467021	1.7958e-07	0.0001
cg26591829	1.81383e-07	0.0001
cg13221868	1.81501e-07	0.0001
cg26418770	1.86409e-07	0.0001
cg18836847	1.87898e-07	0.0001
cg19529471	1.88957e-07	0.0001
cg06951627	1.92111e-07	0.0001
cg03773820	1.9465e-07	0.0001
cg01735398	1.96092e-07	0.0001
cg21602520	1.96537e-07	0.0001
cg14159509	1.97496e-07	0.0001
cg15097669	1.9883e-07	0.0001
cg22606681	1.9883e-07	0.0001
cg24607398	1.9883e-07	0.0001
cg06057569	1.99002e-07	0.0001
cg10094358	2.01623e-07	0.0001
cg03655142	2.02506e-07	0.0001
cg06817772	2.04135e-07	0.0001
cg23356411	2.04135e-07	0.0001
cg23679615	2.04135e-07	0.0001
cg11998049	2.07171e-07	0.0001
cg22469274	2.084e-07	0.0001
cg03301838	2.10823e-07	0.0001
cg10582712	2.10823e-07	0.0009
cg22388948	2.10823e-07	0.0001
cg02612650	2.16807e-07	0.0001
cg17567838	2.20989e-07	0.0001
cg13718098	2.22775e-07	0.0001
cg19111519	2.26835e-07	0.0001
cg07571928	2.27013e-07	0.0001
cg00498211	2.27372e-07	0.0001
cg03529432	2.27952e-07	0.0001
cg21286967	2.29562e-07	0.0001
cg20100049	2.30588e-07	0.0001
cg00988069	2.3305e-07	0.0001
cg26177760	2.34884e-07	0.0001
cg04733668	2.40713e-07	0.0001
cg13021301	2.41405e-07	0.0001
cg17866778	2.41907e-07	0.0001
cg27661104	2.45009e-07	0.0001
cg19832381	2.46385e-07	0.0001
cg16864063	2.47454e-07	0.0001
cg02333467	2.4872e-07	0.0001
cg16052901	2.4872e-07	0.0001
cg13074687	2.50662e-07	0.0001
cg21937377	2.51778e-07	0.0001
cg00040278	2.59299e-07	0.0001
cg06321596	2.59392e-07	0.0001
cg26974062	2.69904e-07	0.0001
cg01787285	2.70774e-07	0.0001
cg07176692	2.72795e-07	0.0001
cg01227450	2.74708e-07	0.0001
cg18477674	2.7615e-07	0.0001
cg01601847	2.80058e-07	0.0001
cg14149172	2.80577e-07	0.0001
cg17100154	2.80949e-07	0.0001
cg10510742	2.81444e-07	0.0001
cg08164233	2.81954e-07	0.0001
cg21895593	2.87463e-07	0.0001
cg12086028	2.94824e-07	0.0001
cg04020309	2.95148e-07	0.0001
cg19713429	2.99336e-07	0.0001
cg16987556	3.1188e-07	0.0001
cg22773697	3.16269e-07	0.0001
cg01229567	3.1696e-07	0.0005
cg02140579	3.1696e-07	0.0001
cg11666365	3.1696e-07	0.0001
cg14544831	3.19574e-07	0.0001
cg00907427	3.23455e-07	0.0001
cg01443426	3.29483e-07	0.0001
cg20152539	3.30593e-07	0.0001
cg01930746	3.39171e-07	0.0001
cg01933228	3.52291e-07	0.0001
cg21428393	3.55519e-07	0.0001
cg11298343	3.59727e-07	0.0001
cg17337668	3.61776e-07	0.0001
cg13384049	3.65222e-07	0.0001
cg01674982	3.65307e-07	0.0001
cg20547647	3.65307e-07	0.0001
cg26515799	3.66944e-07	0.0001
cg13543544	3.74222e-07	0.0001
cg21226442	3.75876e-07	0.0001
cg02892925	3.79935e-07	0.0001
cg00530414	3.80202e-07	0.0001
cg07014891	3.80202e-07	0.0001
cg14442492	3.83565e-07	0.0005
cg22789605	3.84435e-07	0.0001
cg21597480	3.84457e-07	0.0001
cg25551273	3.88861e-07	0.0001
cg21890448	3.92633e-07	0.0001
cg25461186	3.9421e-07	0.0001
cg25840926	3.9421e-07	0.0001
cg04771062	3.94388e-07	0.0001
cg19465320	3.95404e-07	0.0001
cg12432980	3.96141e-07	0.0001
cg03828860	4.04304e-07	0.0001
cg10453758	4.04323e-07	0.0009
cg04545963	4.0519e-07	0.0001
cg14725580	4.0519e-07	0.0001
cg10930293	4.11836e-07	0.0001
cg21201657	4.12148e-07	0.0001
cg27657593	4.1995e-07	0.0001
cg24202477	4.29617e-07	0.0001
cg07330123	4.30221e-07	0.0001
cg23424128	4.35532e-07	0.0001
cg17422460	4.4971e-07	0.0001
cg19621076	4.55191e-07	0.0001
cg23062357	4.66098e-07	0.0001
cg02930969	4.74336e-07	0.0001
cg01935722	4.78278e-07	0.0001
cg09196386	4.7895e-07	0.0001
cg26608693	4.7895e-07	0.0001
cg13904286	4.81166e-07	0.0001
cg07536344	4.82824e-07	0.0001
cg11324953	4.86683e-07	0.0001
cg00292107	4.91229e-07	0.0001
cg06272239	5.10941e-07	0.0001
cg20725067	5.18322e-07	0.0001
cg07204479	5.18531e-07	0.0001
cg09393448	5.19479e-07	0.0001
cg17916418	5.21829e-07	0.0001
cg08376824	5.22436e-07	0.0001
cg21669159	5.22568e-07	0.0001
cg20162239	5.47077e-07	0.0001
cg09721427	5.50221e-07	0.0001
cg07136635	5.60606e-07	0.0001
cg00378510	5.64203e-07	0.0001
cg03711485	5.71218e-07	0.0001
cg13442969	5.78159e-07	0.0001
cg16406078	5.87524e-07	0.0001
cg01323720	5.8946e-07	0.0001
cg01591025	5.89534e-07	0.0001
cg21439672	5.93493e-07	0.0005
cg02118194	6.03692e-07	0.0001
cg14095299	6.08843e-07	0.0001
cg14044640	6.13315e-07	0.0001
cg13951797	6.34096e-07	0.0001
cg14502181	6.34591e-07	0.0001
cg00691729	6.42522e-07	0.0001
cg13824500	6.4692e-07	0.0005
cg26558951	6.59488e-07	0.0001
cg14016875	6.63798e-07	0.0001
cg04961911	6.68671e-07	0.0001
cg03483709	6.70271e-07	0.0001
cg11724055	6.80054e-07	0.0001
cg08196561	6.93407e-07	0.0001
cg09594075	6.94222e-07	0.0001
cg07615364	6.98618e-07	0.0001
cg17428832	7.35223e-07	0.0001
cg17480224	7.40387e-07	0.0001
cg25430089	7.41486e-07	0.0001
cg10913581	7.67073e-07	0.0001
cg15679320	7.67073e-07	0.0001
cg24876187	7.67073e-07	0.0001
cg03534662	7.78922e-07	0.0001
cg15221589	7.80834e-07	0.0001
cg17797863	7.86276e-07	0.0001
cg20462883	8.01753e-07	0.0001
cg24360658	8.0727e-07	0.0001
cg07642595	8.10276e-07	0.0001
cg01388498	8.29567e-07	0.0001
cg19103219	8.42712e-07	0.0001
cg26426142	8.48305e-07	0.0001
cg15533935	8.53736e-07	0.0001
cg21649580	8.62777e-07	0.0001
cg25699034	8.68817e-07	0.0121
cg08568155	8.8333e-07	0.0001
cg03977382	9.15655e-07	0.0001
cg14160349	9.15655e-07	0.0001
cg20765408	9.40199e-07	0.0001
cg08832851	9.50122e-07	0.0001
cg16355231	9.72946e-07	0.0113
cg08122386	9.76876e-07	0.0001
cg18334681	1.00105e-06	0.0001
cg00630636	1.03201e-06	0.0001
cg10184431	1.03418e-06	0.0001
cg16501237	1.03607e-06	0.0001
cg18479961	1.03673e-06	0.0001
cg24463634	1.07541e-06	0.0001
cg11230591	1.08112e-06	0.0001
cg14541870	1.10718e-06	0.0001
cg17832704	1.10755e-06	0.0001
cg04272105	1.13317e-06	0.0001
cg09329266	1.13425e-06	0.0001
cg21386484	1.13688e-06	0.0001
cg00502077	1.16044e-06	0.0001
cg21176026	1.16408e-06	0.0001
cg15903032	1.17064e-06	0.0005
cg17026002	1.20329e-06	0.0001
cg27129922	1.2124e-06	0.0001
cg14034325	1.28111e-06	0.0001
cg02451670	1.28495e-06	0.0001
cg13897348	1.29142e-06	0.0005
cg15726169	1.29889e-06	0.0001
cg16843099	1.30516e-06	0.0001
cg12375158	1.30849e-06	0.0001
cg06199761	1.30991e-06	0.0001
cg25695658	1.31335e-06	0.0001
cg01357135	1.31849e-06	0.0001
cg18233411	1.3214e-06	0.0001
cg04783279	1.32579e-06	0.0001
cg19652271	1.33536e-06	0.0001
cg18182216	1.37897e-06	0.0001
cg16931076	1.40665e-06	0.0001
cg08934677	1.4331e-06	0.0001
cg18673409	1.43682e-06	0.0001
cg06991974	1.43709e-06	0.0001
cg00199059	1.44116e-06	0.0005
cg07481697	1.44116e-06	0.0001
cg10142520	1.44116e-06	0.0001
cg07368857	1.4458e-06	0.0001
cg08830672	1.45344e-06	0.0001
cg07336299	1.46929e-06	0.0001
cg06239064	1.51308e-06	0.0001
cg04577162	1.51932e-06	0.0001
cg05716142	1.52109e-06	0.0001
cg07133347	1.52855e-06	0.0001
cg17197774	1.5624e-06	0.0001
cg19220282	1.57775e-06	0.0001
cg07222505	1.58864e-06	0.0001
cg07545627	1.59285e-06	0.0001
cg18363886	1.59327e-06	0.0001
cg03260799	1.61828e-06	0.0001
cg15482002	1.62164e-06	0.0001
cg19607918	1.63369e-06	0.0005
cg16421089	1.65637e-06	0.0001
cg06016427	1.67488e-06	0.0001
cg17602887	1.6842e-06	0.0001
cg20987067	1.69213e-06	0.0001
cg17803993	1.69444e-06	0.0001
cg15676847	1.69585e-06	0.0001
cg16815625	1.73355e-06	0.0005
cg09999582	1.74141e-06	0.0001
cg20384542	1.74141e-06	0.0001
cg24230340	1.76714e-06	0.0001
cg10344383	1.77472e-06	0.0001
cg04410989	1.78814e-06	0.0005
cg24218620	1.79139e-06	0.0001
cg00166216	1.81701e-06	0.0001
cg09003954	1.82175e-06	0.0001
cg14435807	1.82334e-06	0.0001
cg23504411	1.83552e-06	0.0001
cg24404823	1.86636e-06	0.0001
cg25858738	1.86764e-06	0.0005
cg20454002	1.8812e-06	0.0001
cg23160731	1.8812e-06	0.0001
cg00723069	1.91958e-06	0.0001
cg23979420	1.91958e-06	0.0001
cg22041228	2.01298e-06	0.0001
cg10299976	2.04457e-06	0.0001
cg10701252	2.05275e-06	0.0001
cg02854922	2.05359e-06	0.0001
cg20118553	2.12062e-06	0.0001
cg03052182	2.13532e-06	0.0001
cg02988288	2.15939e-06	0.0001
cg18890544	2.16793e-06	0.0001
cg04056576	2.19335e-06	0.0001
cg05699305	2.19898e-06	0.0001
cg26775604	2.21167e-06	0.0001
cg20894495	2.2246e-06	0.0001
cg08693644	2.25538e-06	0.0001
cg24951593	2.28319e-06	0.0001
cg19442545	2.30789e-06	0.0001
cg00934864	2.34349e-06	0.0001
cg06234584	2.38835e-06	0.0001
cg13855261	2.40614e-06	0.0001
cg20228731	2.43539e-06	0.0001
cg01126905	2.44383e-06	0.0001
cg22098511	2.45946e-06	0.0001
cg06282820	2.46172e-06	0.0001
cg22693837	2.49278e-06	0.0001
cg08941317	2.52505e-06	0.0009
cg13496596	2.5251e-06	0.0001
cg25195877	2.56511e-06	0.0001
cg27511678	2.56511e-06	0.0001
cg23523668	2.59365e-06	0.0001
cg14420108	2.61077e-06	0.0001
cg23182003	2.65324e-06	0.0001
cg06351481	2.67826e-06	0.0001
cg08204159	2.69109e-06	0.0001
cg06002197	2.69698e-06	0.0001
cg20026178	2.70533e-06	0.0001
cg02509745	2.7068e-06	0.0001
cg16982824	2.76936e-06	0.0001
cg07747220	2.77968e-06	0.0009
cg00170483	2.79192e-06	0.0001
cg22122862	2.80567e-06	0.0001
cg04867535	2.80807e-06	0.0001
cg08265926	2.81627e-06	0.0001
cg02868976	2.86097e-06	0.0001
cg24698536	2.89888e-06	0.0001
cg01106748	2.96516e-06	0.0001
cg15817199	2.9862e-06	0.0001
cg11452501	3.00774e-06	0.0001
cg09073799	3.01347e-06	0.0001
cg04732840	3.06148e-06	0.0001
cg20655637	3.0708e-06	0.0001
cg14014731	3.10671e-06	0.0001
cg19405504	3.28717e-06	0.0001
cg06947811	3.31802e-06	0.0001
cg17083429	3.32256e-06	0.0001
cg04212239	3.32315e-06	0.0001
cg16802137	3.3403e-06	0.0001
cg08309687	3.37527e-06	0.0001
cg27160007	3.39331e-06	0.0001
cg09022230	3.40216e-06	0.0001
cg16912343	3.43263e-06	0.0005
cg23615741	3.44817e-06	0.0013
cg24279623	3.44817e-06	0.0001
cg07681748	3.50067e-06	0.0001
cg26460530	3.51339e-06	0.0001
cg01277202	3.53611e-06	0.0001
cg19107973	3.63023e-06	0.0001
cg00185723	3.6348e-06	0.0001
cg01253676	3.66579e-06	0.0001
cg10583997	3.72397e-06	0.0001
cg09045681	3.7311e-06	0.0001
cg03540917	3.74779e-06	0.0001
cg17001566	3.75887e-06	0.0001
cg12471836	3.77487e-06	0.0001
cg03876258	3.79556e-06	0.0001
cg23035209	3.79851e-06	0.0001
cg14943355	3.8432e-06	0.0001
cg10840312	3.86343e-06	0.0001
cg08494221	3.96436e-06	0.0001
cg06375761	3.98506e-06	0.0001
cg19854901	4.17784e-06	0.0009
cg00924459	4.17924e-06	0.0001
cg21466717	4.19358e-06	0.0001
cg17328034	4.20682e-06	0.0001
cg24874286	4.20682e-06	0.0001
cg00022866	4.22639e-06	0.0001
cg07616394	4.23147e-06	0.0001
cg25325512	4.23953e-06	0.0001
cg23730027	4.29664e-06	0.0001
cg22795891	4.30072e-06	0.0001
cg05857643	4.31802e-06	0.0001
cg23358629	4.4186e-06	0.0001
cg13753585	4.45599e-06	0.0001
cg11629830	4.49847e-06	0.0001
cg06707236	4.51696e-06	0.0001
cg15920975	4.57526e-06	0.0001
cg21698310	4.58185e-06	0.0001
cg07954423	4.61703e-06	0.0001
cg08293075	4.62089e-06	0.0001
cg13443605	4.63224e-06	0.0001
cg05232694	4.6744e-06	0.0001
cg00420193	4.7676e-06	0.0001
cg05670953	4.76977e-06	0.0001
cg21919047	4.81449e-06	0.0001
cg02329699	4.84846e-06	0.0005
cg02197826	4.8565e-06	0.0001
cg00432840	4.86525e-06	0.0001
cg01458484	4.86907e-06	0.0001
cg06478995	4.87912e-06	0.0001
cg14660676	5.01183e-06	0.0001
cg11769062	5.01955e-06	0.0001
cg04873098	5.12509e-06	0.0001
cg18810947	5.1503e-06	0.0001
cg19639743	5.22052e-06	0.0005
cg21645826	5.23899e-06	0.0001
cg22956060	5.27849e-06	0.0001
cg16854065	5.29247e-06	0.0001
cg22725343	5.30029e-06	0.0001
cg21386647	5.40153e-06	0.0001
cg16034652	5.41221e-06	0.0001
cg06643466	5.43287e-06	0.0001
cg09853933	5.59757e-06	0.0001
cg01355392	5.6044e-06	0.0001
cg26572811	5.61404e-06	0.0001
cg27395200	5.63432e-06	0.0001
cg17055599	5.67817e-06	0.0001
cg15838173	5.71474e-06	0.0001
cg23016776	5.89921e-06	0.0001
cg03686952	5.92748e-06	0.0001
cg15530112	5.93269e-06	0.0001
cg03418876	5.94319e-06	0.0001
cg18183624	5.94494e-06	0.0001
cg23471067	5.97928e-06	0.0001
cg04369491	5.99209e-06	0.0001
cg02349264	6.01359e-06	0.0001
cg03866211	6.09964e-06	0.0001
cg22871253	6.43954e-06	0.0001
cg11356911	6.45093e-06	0.0001
cg23095634	6.64017e-06	0.0001
cg04723534	6.64386e-06	0.0001
cg26771582	6.66962e-06	0.0001
cg16680547	6.74188e-06	0.0001
cg09570958	6.76498e-06	0.0001
cg03593280	6.91898e-06	0.0001
cg18790642	6.94311e-06	0.0001
cg26551026	7.1677e-06	0.0081
cg16521040	7.20368e-06	0.0001
cg09642825	7.25259e-06	0.0005
cg02593517	7.459e-06	0.0001
cg14148396	7.47792e-06	0.0001
cg19723657	7.5153e-06	0.0001
cg05081614	7.57833e-06	0.0001
cg08765910	7.57833e-06	0.0001
cg21990700	7.57833e-06	0.0001
cg07088882	7.61365e-06	0.0001
cg08301612	7.64303e-06	0.0097
cg16518861	7.64303e-06	0.0001
cg24251135	7.64303e-06	0.0001
cg03043406	7.65758e-06	0.0001
cg18509466	7.68548e-06	0.0001
cg00377497	7.70266e-06	0.0013
cg03398090	7.71169e-06	0.0001
cg26615736	7.74955e-06	0.0001
cg01945183	7.83687e-06	0.0001
cg12260379	7.85675e-06	0.0001
cg08137888	7.99951e-06	0.0001
cg06362282	8.04277e-06	0.0001
cg03494428	8.06969e-06	0.0001
cg23218354	8.06969e-06	0.0001
cg19933238	8.13483e-06	0.0001
cg19922101	8.18806e-06	0.0001
cg12872311	8.19086e-06	0.0001
cg17207590	8.19176e-06	0.0001
cg01876548	8.29873e-06	0.0001
cg12340169	8.64009e-06	0.0001
cg13159166	8.69839e-06	0.0001
cg26470501	8.89419e-06	0.0001
cg23336702	8.96381e-06	0.0001
cg19996272	9.13406e-06	0.0001
cg21468274	9.24041e-06	0.0001
cg05083852	9.30156e-06	0.0001
cg11268834	9.3462e-06	0.0001
cg22132509	9.43937e-06	0.0001
cg27664806	9.5047e-06	0.0001
cg07754935	9.71977e-06	0.0001
cg04543865	9.87312e-06	0.0001
cg12825509	1.0084e-05	0.0001
cg26467528	1.01451e-05	0.0001
cg22478210	1.02097e-05	0.0001
cg14384230	1.02185e-05	0.0001
cg02611240	1.02959e-05	0.0001
cg24550112	1.03134e-05	0.0001
cg22590761	1.03268e-05	0.0001
cg09408116	1.04466e-05	0.0001
cg14205800	1.05446e-05	0.0001
cg06230848	1.06022e-05	0.0001
cg15414930	1.06592e-05	0.0153
cg02838825	1.07627e-05	0.0001
cg03872831	1.08232e-05	0.0001
cg12395158	1.08452e-05	0.0001
cg20596640	1.0907e-05	0.0001
cg25683662	1.10229e-05	0.0001
cg04592758	1.10307e-05	0.0001
cg00285394	1.10766e-05	0.0001
cg19433091	1.14121e-05	0.0001
cg10643550	1.1435e-05	0.0001
cg13433694	1.16142e-05	0.0001
cg00945555	1.17915e-05	0.0001
cg16301036	1.18261e-05	0.0013
cg26272443	1.20122e-05	0.0001
cg12115391	1.20681e-05	0.0005
cg01246434	1.22743e-05	0.0001
cg02863594	1.22743e-05	0.0001
cg15765380	1.23177e-05	0.0001
cg13390284	1.23668e-05	0.0037
cg20322193	1.27871e-05	0.0001
cg18335326	1.31068e-05	0.0001
cg00982136	1.32178e-05	0.0001
cg18757087	1.3509e-05	0.0009
cg16525470	1.35705e-05	0.0005
cg08425810	1.37207e-05	0.0013
cg06930433	1.38984e-05	0.0001
cg12331471	1.39744e-05	0.0001
cg13449484	1.42356e-05	0.0001
cg10710569	1.4313e-05	0.0001
cg09523691	1.43315e-05	0.0001
cg10678266	1.45702e-05	0.0001
cg27213800	1.46234e-05	0.0001
cg06992609	1.49977e-05	0.0001
cg07263393	1.51018e-05	0.0001
cg22449114	1.51018e-05	0.0001
cg17375267	1.51886e-05	0.0005
cg01628528	1.52121e-05	0.0001
cg17139085	1.5389e-05	0.0001
cg08586215	1.55783e-05	0.0001
cg08163621	1.57219e-05	0.0001
cg00547103	1.58158e-05	0.0001
cg06243115	1.58158e-05	0.0001
cg07995927	1.58828e-05	0.0005
cg08787837	1.60272e-05	0.0001
cg15340312	1.61199e-05	0.0001
cg02630694	1.62025e-05	0.0001
cg08097581	1.65355e-05	0.0001
cg15574642	1.65355e-05	0.0001
cg25340973	1.67387e-05	0.0001
cg16987437	1.70135e-05	0.0001
cg26564684	1.72017e-05	0.0001
cg21475097	1.73057e-05	0.0001
cg03609639	1.74697e-05	0.0009
cg17431990	1.75464e-05	0.0001
cg16257219	1.76493e-05	0.0001
cg07259219	1.78076e-05	0.0001
cg17606183	1.78537e-05	0.0001
cg26796095	1.78537e-05	0.0001
cg00923744	1.79548e-05	0.0001
cg08544436	1.80135e-05	0.0001
cg18387107	1.80911e-05	0.0001
cg24373369	1.8348e-05	0.0001
cg16015113	1.84063e-05	0.0001
cg17359753	1.86665e-05	0.0001
cg11122009	1.87746e-05	0.0001
cg17177006	1.90987e-05	0.0001
cg14476101	1.91618e-05	0.0001
cg11380327	1.92083e-05	0.0001
cg06972019	1.92843e-05	0.0001
cg03818715	1.93649e-05	0.0001
cg16340282	1.96862e-05	0.0001
cg22974952	1.97478e-05	0.0001
cg17921464	1.9781e-05	0.0001
cg00010654	1.97815e-05	0.0001
cg08066376	1.99297e-05	0.0001
cg14800136	2.00563e-05	0.0001
cg12197459	2.01535e-05	0.0001
cg15488998	2.02452e-05	0.0001
cg16766325	2.02452e-05	0.0001
cg23210906	2.04292e-05	0.0001
cg05225684	2.04785e-05	0.0001
cg26559804	2.05157e-05	0.0001
cg14282850	2.05987e-05	0.0001
cg23625628	2.06947e-05	0.0001
cg13795986	2.0963e-05	0.0001
cg13672342	2.10441e-05	0.0001
cg24332710	2.13749e-05	0.0001
cg07587451	2.16014e-05	0.0005
cg24362796	2.1641e-05	0.0001
cg01821684	2.16559e-05	0.0001
cg05655647	2.18451e-05	0.0001
cg19014792	2.18472e-05	0.0001
cg16745444	2.18533e-05	0.0001
cg02793162	2.21679e-05	0.0001
cg06856216	2.21941e-05	0.0005
cg02011723	2.22457e-05	0.0001
cg11614245	2.27711e-05	0.0001
cg13768953	2.29186e-05	0.0001
cg07417599	2.30029e-05	0.0001
cg20173170	2.34323e-05	0.0001
cg03780271	2.37538e-05	0.0001
cg27423445	2.37637e-05	0.0005
cg10516338	2.38093e-05	0.0001
cg08055131	2.43755e-05	0.0001
cg13809528	2.43755e-05	0.0001
cg23848052	2.43755e-05	0.0001
cg00142402	2.44708e-05	0.0001
cg04903783	2.47585e-05	0.0001
cg13021550	2.49679e-05	0.0001
cg19284460	2.49679e-05	0.0001
cg16164356	2.54567e-05	0.0001
cg15436294	2.56598e-05	0.0001
cg14170976	2.57475e-05	0.0001
cg07362537	2.58692e-05	0.0001
cg12074985	2.58692e-05	0.0001
cg00541638	2.59973e-05	0.0001
cg05043794	2.60136e-05	0.0001
cg00016255	2.62746e-05	0.0001
cg18200865	2.62746e-05	0.0001
cg15928106	2.63481e-05	0.0001
cg17344149	2.65945e-05	0.0001
cg04132452	2.66639e-05	0.0001
cg00054774	2.67005e-05	0.0001
cg05658730	2.67637e-05	0.0001
cg02611934	2.68579e-05	0.0001
cg06995969	2.69094e-05	0.0089
cg07100116	2.73411e-05	0.0001
cg10308785	2.73655e-05	0.0001
cg15645467	2.8147e-05	0.0001
cg10222947	2.89409e-05	0.0001
cg26152983	2.90285e-05	0.0117
cg26708596	2.91825e-05	0.0001
cg27183173	2.94394e-05	0.0001
cg14221766	2.97609e-05	0.0001
cg13272108	2.99945e-05	0.0001
cg04247717	3.04059e-05	0.0001
cg14630206	3.04631e-05	0.0001
cg24807850	3.04656e-05	0.0001
cg07629854	3.06352e-05	0.0001
cg21160062	3.06352e-05	0.0001
cg00442389	3.10358e-05	0.0001
cg07147033	3.10533e-05	0.0009
cg12444076	3.10727e-05	0.0001
cg04198187	3.11482e-05	0.0001
cg07196426	3.14484e-05	0.0001
cg00273359	3.14948e-05	0.0001
cg22202121	3.15124e-05	0.0001
cg13455434	3.18132e-05	0.0001
cg23811268	3.18132e-05	0.0001
cg14825287	3.20929e-05	0.0001
cg22114934	3.20929e-05	0.0001
cg03036592	3.21122e-05	0.0009
cg08248285	3.21122e-05	0.0001
cg00985115	3.25462e-05	0.0001
cg18968920	3.27585e-05	0.0005
cg17127702	3.35053e-05	0.0001
cg17394978	3.35053e-05	0.0005
cg01681525	3.39136e-05	0.0001
cg11916669	3.39136e-05	0.0001
cg14010395	3.4021e-05	0.0001
cg23478124	3.44652e-05	0.0013
cg20652404	3.47258e-05	0.0001
cg25953417	3.48097e-05	0.0001
cg21180726	3.49023e-05	0.0001
cg06820975	3.50857e-05	0.0001
cg13285174	3.59576e-05	0.0001
cg20998791	3.59952e-05	0.0001
cg02103401	3.60005e-05	0.0001
cg02127888	3.60005e-05	0.0001
cg12756376	3.64285e-05	0.0001
cg19902443	3.64285e-05	0.0001
cg11023328	3.74707e-05	0.0001
cg17807384	3.76976e-05	0.0001
cg08043020	3.77343e-05	0.0001
cg14593575	3.78578e-05	0.0001
cg16714654	3.80793e-05	0.0001
cg19499884	3.80869e-05	0.0057
cg05537355	3.83489e-05	0.0001
cg02045451	3.84371e-05	0.0001
cg10372921	3.84515e-05	0.0001
cg17569842	3.84515e-05	0.0001
cg04657684	3.86129e-05	0.0001
cg04532551	3.90114e-05	0.0001
cg21538208	3.91903e-05	0.0001
cg07654588	3.97048e-05	0.0001
cg13026072	3.99898e-05	0.0001
cg20389004	4.0533e-05	0.0001
cg22735222	4.05815e-05	0.0001
cg02757970	4.11894e-05	0.0001
cg13060704	4.12579e-05	0.0001
cg15344234	4.19298e-05	0.0001
cg20786514	4.19298e-05	0.0001
cg19916364	4.22078e-05	0.0001
cg27490099	4.22078e-05	0.0001
cg08988821	4.22533e-05	0.0001
cg01232748	4.29706e-05	0.0009
cg03143849	4.34852e-05	0.0001
cg22599477	4.43058e-05	0.0001
cg04049626	4.47432e-05	0.0001
cg04615859	4.49916e-05	0.0001
cg27052582	4.52362e-05	0.0001
cg22498676	4.56385e-05	0.0001
cg21382698	4.61823e-05	0.0001
cg18814941	4.75973e-05	0.0001
cg16662291	4.82125e-05	0.0001
cg00028013	4.82939e-05	0.0005
cg17979719	4.8719e-05	0.0001
cg23827610	4.89305e-05	0.0001
cg14120147	4.89872e-05	0.0001
cg18881641	4.90508e-05	0.0001
cg20803236	4.94246e-05	0.0001
cg07906688	4.99511e-05	0.0001
cg16094352	5.02656e-05	0.0001
cg03607573	5.03059e-05	0.0029
cg07006163	5.03548e-05	0.0001
cg26233209	5.07496e-05	0.0001
cg27422507	5.07503e-05	0.0001
cg01798157	5.08353e-05	0.0001
cg21570209	5.14421e-05	0.0001
cg11705651	5.15783e-05	0.0001
cg18241337	5.20464e-05	0.0001
cg14284554	5.22509e-05	0.0001
cg15713103	5.24812e-05	0.0001
cg11591310	5.25686e-05	0.0001
cg03353442	5.30158e-05	0.0001
cg25023902	5.32792e-05	0.0001
cg17164356	5.33097e-05	0.0001
cg05928186	5.34206e-05	0.0005
cg22496254	5.44692e-05	0.0001
cg04422903	5.44814e-05	0.0001
cg21781988	5.55047e-05	0.0009
cg03744810	5.607e-05	0.0001
cg25158734	5.607e-05	0.0001
cg06121808	5.61883e-05	0.0001
cg10846698	5.64246e-05	0.0001
cg01215495	5.64996e-05	0.0001
cg11433727	5.65026e-05	0.0005
cg19516340	5.65261e-05	0.0001
cg00525681	5.68726e-05	0.0001
cg08574246	5.71974e-05	0.0001
cg24759919	5.76327e-05	0.0001
cg17271974	5.76783e-05	0.0001
cg06005844	5.7805e-05	0.0001
cg10731236	5.78972e-05	0.0001
cg19894966	5.82196e-05	0.0005
cg21573101	5.84437e-05	0.0001
cg04972745	5.86002e-05	0.0009
cg04794662	5.97409e-05	0.0037
cg19321684	5.9955e-05	0.0001
cg04293724	6.01727e-05	0.0001
cg14740251	6.07218e-05	0.0001
cg18969008	6.07218e-05	0.0005
cg09851528	6.15583e-05	0.0001
cg26267561	6.15583e-05	0.0005
cg18035914	6.2382e-05	0.0001
cg03427849	6.31535e-05	0.0001
cg04436755	6.35663e-05	0.0001
cg09316472	6.40499e-05	0.0005
cg10504003	6.40771e-05	0.0005
cg16566518	6.4366e-05	0.0001
cg22940798	6.5159e-05	0.0001
cg10894388	6.51591e-05	0.0001
cg03737080	6.53732e-05	0.0001
cg15857661	6.56144e-05	0.0005
cg22403850	6.57992e-05	0.0001
cg12247101	6.63314e-05	0.0005
cg14699004	6.71786e-05	0.0005
cg01838728	6.72577e-05	0.0001
cg21455891	6.87671e-05	0.0069
cg03404471	6.9499e-05	0.0001
cg16059425	6.98386e-05	0.0001
cg13720868	7.02091e-05	0.0001
cg17855598	7.07466e-05	0.0001
cg00534318	7.08657e-05	0.0001
cg16981180	7.09263e-05	0.0009
cg03873281	7.119e-05	0.0005
cg18690816	7.27402e-05	0.0001
cg01742255	7.30453e-05	0.0001
cg14001239	7.32192e-05	0.0001
cg15209556	7.33101e-05	0.0001
cg26936496	7.33101e-05	0.0021
cg19569438	7.36847e-05	0.0001
cg26777729	7.36847e-05	0.0001
cg05157098	7.37903e-05	0.0005
cg20447114	7.39233e-05	0.0013
cg23950233	7.39233e-05	0.0017
cg12751127	7.5235e-05	0.0001
cg26748578	7.58141e-05	0.0001
cg03330058	7.71471e-05	0.0001
cg21701823	7.76058e-05	0.0193
cg05244581	7.88032e-05	0.0001
cg20013533	7.89685e-05	0.0001
cg14986464	7.98946e-05	0.0001
cg14663940	8.03282e-05	0.0005
cg25476565	8.06252e-05	0.0001
cg26083458	8.10506e-05	0.0001
cg04546899	8.17588e-05	0.0001
cg14434020	8.18308e-05	0.0001
cg21644740	8.23151e-05	0.0001
cg00661822	8.26464e-05	0.0001
cg12001491	8.26464e-05	0.0001
cg13533069	8.3676e-05	0.0001
cg22875823	8.44647e-05	0.0001
cg26358582	8.44647e-05	0.0001
cg25085245	8.45734e-05	0.0001
cg16875629	8.4646e-05	0.0001
cg09984392	8.57007e-05	0.0001
cg13098318	8.6193e-05	0.0001
cg26101468	8.78279e-05	0.0049
cg12110087	8.89149e-05	0.0001
cg09706192	8.95144e-05	0.0073
cg15079315	8.99966e-05	0.0001
cg02608002	9.04667e-05	0.0001
cg18582260	9.07487e-05	0.0001
cg20693334	9.07635e-05	0.0001
cg19677267	9.09311e-05	0.0001
cg18464274	9.15877e-05	0.0001
cg18474180	9.21925e-05	0.0001
cg14446942	9.41089e-05	0.0029
cg20916523	9.4282e-05	0.0001
cg18045878	9.44786e-05	0.0021
cg26996616	9.46472e-05	0.0001
cg02798576	9.47766e-05	0.0005
cg26787379	9.60046e-05	0.0001
cg04212933	9.60257e-05	0.0001
cg16619378	9.60257e-05	0.0001
cg23627169	9.60987e-05	0.0009
cg02582963	9.61094e-05	0.0001
cg15491247	9.61094e-05	0.0001
cg20827337	9.6821e-05	0.0001
cg05759148	9.72042e-05	0.0001
cg04070685	9.84908e-05	0.0097
cg19421584	9.89749e-05	0.0001
cg10189850	9.95319e-05	0.0001
cg09229493	9.95377e-05	0.0005
cg04650032	0.000100864	0.0001
cg19328057	0.000100864	0.0001
cg05333194	0.000101189	0.0001
cg07526656	0.000103865	0.0001
cg07833564	0.000103894	0.0005
cg08684893	0.000104041	0.0001
cg20677205	0.000104719	0.0001
cg06603074	0.000104991	0.0001
cg10508317	0.000106355	0.0001
cg18620804	0.000106781	0.0001
cg03052078	0.000106986	0.0265
cg26961260	0.00010876	0.0005
cg05251190	0.000108837	0.0001
cg24896864	0.000109131	0.0001
cg06239513	0.000112249	0.0001
cg08822075	0.000114246	0.0061
cg08653930	0.000116183	0.0001
cg05908398	0.000117516	0.0001
cg10033675	0.000117802	0.0001
cg12105190	0.000117884	0.0005
cg05960182	0.000118062	0.0009
cg12474981	0.000118668	0.0001
cg10832308	0.000118831	0.0001
cg20303028	0.000119917	0.0001
cg04091927	0.000120954	0.0001
cg24571769	0.000121929	0.0001
cg06804564	0.000122346	0.0001
cg08534614	0.000122346	0.0001
cg04694022	0.000125131	0.0001
cg12749559	0.000125254	0.0001
cg18806912	0.000125978	0.0001
cg02364826	0.000126073	0.0001
cg05659611	0.000127125	0.0001
cg05722266	0.000127914	0.0001
cg13805518	0.00012893	0.0009
cg11112615	0.000129766	0.0053
cg12367539	0.000132389	0.0001
cg26774981	0.000132389	0.0001
cg21902394	0.000133421	0.0001
cg06647068	0.000134242	0.0009
cg10382814	0.000135971	0.0001
cg10784813	0.000136986	0.0009
cg16592121	0.000139501	0.0001
cg11463444	0.000140459	0.0001
cg14540650	0.000140459	0.0001
cg06716182	0.000141682	0.0001
cg14351425	0.00014175	0.0001
cg18808261	0.000142221	0.0001
cg10261612	0.000143414	0.0001
cg06638023	0.000143547	0.0001
cg24341311	0.000144265	0.0001
cg11205494	0.00014445	0.0001
cg01218899	0.000145087	0.0005
cg00441434	0.00014537	0.0005
cg24009731	0.00014592	0.0001
cg10127249	0.000146188	0.0001
cg18353226	0.000146412	0.0001
cg05088892	0.000147871	0.0001
cg08471846	0.000147965	0.0001
cg13008631	0.000151546	0.0001
cg17556300	0.000151554	0.0001
cg22524822	0.000153757	0.0001
cg04483721	0.000154724	0.0001
cg04496281	0.000155544	0.0001
cg16268636	0.000157759	0.0001
cg21608225	0.000157988	0.0001
cg11977716	0.000162816	0.0001
cg08064292	0.000165069	0.0001
cg16536390	0.000165814	0.0001
cg21922810	0.000166094	0.0001
cg26814396	0.000166798	0.0001
cg17144149	0.000168003	0.0001
cg01887846	0.000170516	0.0001
cg01820962	0.00017096	0.0001
cg00124004	0.000172255	0.0001
cg04736217	0.000172983	0.0001
cg18079499	0.00017308	0.0001
cg23934295	0.000173509	0.0001
cg08864042	0.000173532	0.0001
cg01102073	0.000174731	0.0001
cg23985941	0.000177929	0.0001
cg09304975	0.000178392	0.0001
cg08128087	0.000179061	0.0001
cg16748088	0.000180972	0.0001
cg21659668	0.000180977	0.0001
cg00362285	0.000187975	0.0001
cg05146057	0.000187975	0.0001
cg21053323	0.000187975	0.0001
cg18512948	0.000188408	0.0001
cg05260783	0.000192014	0.0001
cg13838969	0.000192807	0.0001
cg09337121	0.000193446	0.0001
cg22370326	0.000193941	0.0001
cg14507310	0.000193986	0.0001
cg21596426	0.00019534	0.0001
cg13849276	0.000196065	0.0001
cg04092777	0.00019704	0.0001
cg21282663	0.000197074	0.0001
cg05547853	0.000197717	0.0001
cg00376553	0.000199784	0.0001
cg13007871	0.000200179	0.0005
cg21405001	0.000201805	0.0001
cg06532880	0.000202197	0.0001
cg03864397	0.00020349	0.0001
cg06796779	0.000204261	0.0001
cg00595243	0.000205553	0.0001
cg00636946	0.000206699	0.0005
cg04027548	0.000207431	0.0001
cg00256302	0.000209378	0.0001
cg27234129	0.000209543	0.0001
cg23317297	0.000211575	0.0009
cg13148151	0.000211815	0.0001
cg16916987	0.000213066	0.0001
cg11084718	0.000214833	0.0001
cg21841620	0.00021666	0.0001
cg07405182	0.000216834	0.0001
cg04873188	0.000216836	0.0001
cg14036704	0.000217581	0.0001
cg12873610	0.000220288	0.0001
cg08847140	0.00022038	0.0001
cg13929988	0.000221528	0.0001
cg02978140	0.000223222	0.0001
cg04234016	0.000226973	0.0001
cg12427404	0.000227754	0.0001
cg12880095	0.000230931	0.0001
cg27403609	0.000230931	0.0001
cg05774672	0.000231961	0.0001
cg04104738	0.000232979	0.0001
cg08596486	0.000232979	0.0001
cg17372806	0.000233338	0.0001
cg05527507	0.000234154	0.0001
cg08375515	0.000234366	0.0001
cg20422417	0.000234378	0.0001
cg08036934	0.000234472	0.0005
cg06524039	0.000236921	0.0037
cg00617180	0.000240136	0.0001
cg11594821	0.000240136	0.0041
cg23061725	0.000241307	0.0001
cg07829444	0.000244622	0.0005
cg05339727	0.00024474	0.0001
cg16750777	0.000246784	0.0001
cg12307174	0.00025064	0.0001
cg21314058	0.000253289	0.0001
cg26307871	0.000253476	0.0001
cg01764105	0.000261154	0.0001
cg15028756	0.000262518	0.0001
cg08729686	0.0002627	0.0001
cg00414384	0.000264157	0.0001
cg01158804	0.000264929	0.0009
cg16034991	0.000264929	0.0009
cg05769443	0.000267866	0.0001
cg01633902	0.000268893	0.0001
cg21306072	0.000268893	0.0001
cg20411668	0.00027025	0.0001
cg27468328	0.00027025	0.0005
cg02516101	0.000270412	0.0001
cg13023677	0.000270416	0.0001
cg02136452	0.00027175	0.0005
cg24951781	0.00027175	0.0009
cg26156699	0.000274478	0.0001
cg21863888	0.000279709	0.0001
cg00036656	0.000280024	0.0009
cg01109574	0.000280024	0.0001
cg17714703	0.000280024	0.0001
cg18262993	0.000280403	0.0001
cg19554457	0.000280604	0.0001
cg17373514	0.000280773	0.0001
cg24497582	0.00028129	0.0001
cg27609665	0.000285175	0.0001
cg03832440	0.000286379	0.0001
cg22327175	0.000288712	0.0001
cg11100028	0.000288802	0.0001
cg23748340	0.000289575	0.0001
cg01710903	0.000292018	0.0001
cg16459265	0.000292018	0.0021
cg13754259	0.000293487	0.0005
cg08702915	0.000294776	0.0001
cg05746014	0.000295375	0.0001
cg10060521	0.000296507	0.0005
cg05977523	0.000298853	0.0001
cg16780632	0.0002997	0.0001
cg08314989	0.00030007	0.0001
cg09341892	0.000300306	0.0001
cg25214158	0.000300995	0.0005
cg20329047	0.000303485	0.0005
cg24331475	0.000304473	0.0001
cg10262997	0.000306363	0.0001
cg17974185	0.000307357	0.0001
cg05540052	0.000308448	0.0001
cg09012471	0.00030903	0.0005
cg26783428	0.00030903	0.0001
cg15611336	0.000309461	0.0001
cg15390444	0.000309635	0.0001
cg10426318	0.000312384	0.0021
cg09823859	0.000313033	0.0001
cg10819350	0.000313033	0.0001
cg12956311	0.00031706	0.0001
cg20776772	0.00031707	0.0001
cg16705546	0.000317197	0.0001
cg27346424	0.000317347	0.0001
cg04503160	0.000317412	0.0001
cg17848515	0.000319022	0.0009
cg01613691	0.000322806	0.0001
cg21171704	0.000322806	0.0001
cg14461099	0.000326031	0.0001
cg26877596	0.000326523	0.0001
cg16105635	0.000326626	0.0001
cg26298737	0.000326637	0.0001
cg24027937	0.000332503	0.0001
cg18137347	0.000334209	0.0077
cg09180564	0.00033806	0.0001
cg23583454	0.00033806	0.0001
cg02393640	0.000338939	0.0001
cg03127104	0.000342161	0.0001
cg24840200	0.0003424	0.0001
cg09608765	0.000343879	0.0001
cg18198306	0.000343879	0.0001
cg00362690	0.000344544	0.0009
cg11939713	0.000346846	0.0001
cg27440381	0.000346846	0.0001
cg14537549	0.0003509	0.0001
cg27159902	0.000355848	0.0001
cg22266211	0.000356379	0.0001
cg01440687	0.000358291	0.0001
cg03779490	0.000359304	0.0001
cg04351776	0.000359634	0.0001
cg21288889	0.000364619	0.0001
cg04536829	0.000366302	0.0001
cg12350688	0.000366302	0.0001
cg27316798	0.000369761	0.0001
cg02925049	0.000370326	0.0001
cg17475949	0.000371507	0.0001
cg11434810	0.000373097	0.0009
cg00312125	0.000381945	0.0001
cg12310765	0.000383986	0.0001
cg14051760	0.000386567	0.0001
cg21910650	0.000390698	0.0001
cg24622122	0.000393323	0.0001
cg20897136	0.000400728	0.0001
cg04731988	0.000400971	0.0009
cg14691266	0.000402682	0.0001
cg20337215	0.000402682	0.0001
cg20485190	0.000408454	0.0005
cg16779839	0.000412737	0.0001
cg07286682	0.000417235	0.0001
cg01719995	0.000419441	0.0109
cg25824217	0.000423681	0.0021
cg10038185	0.000432268	0.0009
cg22706106	0.000432268	0.0013
cg25827066	0.00043381	0.0005
cg04754956	0.000437248	0.0001
cg26703507	0.000437259	0.0001
cg10290474	0.000439371	0.0001
cg02910018	0.000441127	0.0001
cg04612171	0.000441718	0.0001
cg17806418	0.000445498	0.0001
cg18071894	0.00044628	0.0001
cg09187655	0.000446413	0.0005
cg05901196	0.000452576	0.0025
cg04414860	0.000453346	0.0001
cg00189689	0.000454151	0.0189
cg23399028	0.00045597	0.0021
cg06573459	0.000458344	0.0001
cg03567554	0.000459608	0.0001
cg05144285	0.000464434	0.0001
cg02671486	0.000469534	0.0005
cg01856536	0.000473447	0.0005
cg01966061	0.00047756	0.0001
cg26393629	0.000479313	0.0001
cg03044573	0.000482569	0.0005
cg00744413	0.000482719	0.0001
cg11832956	0.000483325	0.0001
cg07018550	0.000483346	0.0001
cg01330280	0.000484063	0.0001
cg15134801	0.000484309	0.0001
cg19682134	0.000488594	0.0001
cg00924482	0.000489578	0.0001
cg25583580	0.000491067	0.0001
cg00319686	0.000495527	0.0001
cg21267652	0.000498838	0.0001
cg02362841	0.000502717	0.0005
cg02773764	0.000502717	0.0001
cg12810523	0.000504902	0.0001
cg14423778	0.000507988	0.0009
cg09581226	0.000510416	0.0001
cg15167113	0.000510735	0.0001
cg18567079	0.000513647	0.0001
cg00045016	0.000515164	0.0005
cg15611912	0.000516517	0.0001
cg24736217	0.000516517	0.0001
cg03593471	0.00052283	0.0001
cg18773977	0.000526678	0.0001
cg16168178	0.000528905	0.0001
cg23732781	0.000531092	0.0001
cg08374201	0.000533208	0.0001
cg13441891	0.0005352	0.0001
cg00926318	0.000536106	0.0001
cg27164797	0.000536106	0.0017
cg03024660	0.000536492	0.0001
cg06392883	0.000537482	0.0013
cg06373167	0.000539496	0.0001
cg13483727	0.000539496	0.0001
cg04265576	0.000542417	0.0001
cg27134944	0.000542675	0.0001
cg03163262	0.000544171	0.0001
cg27252086	0.000550639	0.0001
cg23129930	0.000554457	0.0005
cg03682712	0.000555739	0.0001
cg04637454	0.000564554	0.0001
cg05858126	0.000565551	0.0001
cg07962315	0.000569462	0.0009
cg25315031	0.000571083	0.0045
cg00919591	0.000572967	0.0001
cg01602139	0.000577403	0.0073
cg05201191	0.000580976	0.0005
cg19969083	0.000585605	0.0001
cg12882503	0.000587502	0.0001
cg02435472	0.000588539	0.0001
cg21220374	0.000595713	0.0001
cg16394290	0.000595814	0.0033
cg13522462	0.000597256	0.0001
cg17539697	0.00059914	0.0001
cg14996263	0.000604067	0.0001
cg09311869	0.000606258	0.0001
cg27529014	0.000608916	0.0001
cg05780139	0.000612782	0.0001
cg06398236	0.000612782	0.0005
cg09199323	0.000614577	0.0001
cg12954338	0.000619585	0.0005
cg11792786	0.000620007	0.0001
cg12775659	0.00062113	0.0001
cg05157266	0.000622772	0.0001
cg13474639	0.000623398	0.0001
cg15908709	0.000637882	0.0033
cg23038338	0.000640109	0.0001
cg16246488	0.000644106	0.0001
cg17011411	0.000652325	0.0001
cg21303272	0.000652659	0.0001
cg03373913	0.000657888	0.0001
cg16324745	0.000665897	0.0001
cg13431454	0.00067813	0.0001
cg16186541	0.000678779	0.0001
cg16956170	0.000678847	0.0001
cg05027594	0.000679383	0.0001
cg04990372	0.000691798	0.0001
cg06636541	0.000691798	0.0001
cg17508639	0.000695693	0.0005
cg06058627	0.000698605	0.0001
cg05622324	0.000698725	0.0001
cg14769991	0.000698778	0.0001
cg23462236	0.000702892	0.0009
cg03152179	0.000708144	0.0001
cg06526741	0.000708144	0.0001
cg09322973	0.000709328	0.0009
cg25246084	0.000711964	0.0001
cg18422750	0.000716005	0.0021
cg07095347	0.000717852	0.0001
cg06151074	0.00071817	0.0009
cg14016128	0.000722627	0.0001
cg22778788	0.000723352	0.0001
cg02529485	0.00072817	0.0001
cg13638257	0.000731187	0.0001
cg06051201	0.000731189	0.0001
cg14174912	0.000734195	0.0001
cg01752881	0.000737905	0.0001
cg05544413	0.000748339	0.0001
cg05600174	0.00075705	0.0001
cg04252928	0.000757807	0.0001
cg27300829	0.000765346	0.0001
cg07425204	0.00076754	0.0001
cg07486785	0.000768483	0.0001
cg14737131	0.000773022	0.0009
cg00564285	0.000773072	0.0001
cg03883572	0.000781981	0.0001
cg14347386	0.00078219	0.0001
cg24132956	0.000792026	0.0005
cg07663788	0.000795137	0.0001
cg10938436	0.000797778	0.0013
cg15986668	0.000804542	0.0001
cg14377720	0.000809696	0.0009
cg14096277	0.000813503	0.0001
cg15143809	0.000818522	0.0001
cg10969521	0.0008188	0.0001
cg00026474	0.000827231	0.0001
cg00530805	0.00082842	0.0177
cg20507228	0.000831823	0.0021
cg16127364	0.000845516	0.0005
cg20078406	0.000856302	0.0001
cg17265994	0.000861735	0.0005
cg15777261	0.000863126	0.0001
cg09784886	0.000870156	0.0001
cg23063647	0.000871196	0.0001
cg11677721	0.000873312	0.0001
cg10560069	0.000874124	0.0001
cg03054890	0.000876983	0.0001
cg14257435	0.000889184	0.0001
cg12461686	0.000895769	0.0001
cg23544971	0.000896205	0.0001
cg09015973	0.00090148	0.0001
cg12609893	0.000902094	0.0001
cg02341182	0.000905157	0.0001
cg03238513	0.00090869	0.0001
cg02286809	0.000911061	0.0001
cg17155007	0.000912546	0.0017
cg00523379	0.000914016	0.0001
cg00738387	0.000914364	0.0005
cg10693587	0.000918171	0.0013
cg05820861	0.000920334	0.0001
cg19006947	0.000921193	0.0013
cg01464849	0.000928993	0.0001
cg15934730	0.000931798	0.0001
cg21489364	0.000949025	0.0001
cg04506190	0.000958112	0.0001
cg02940147	0.000965356	0.0001
cg19910679	0.000967292	0.0005
cg14984824	0.000974236	0.0005
cg05780543	0.000990603	0.0001
cg26374678	0.000991711	0.0001
cg22404596	0.000997631	0.0001
cg19816811	0.0010008	0.0005
cg24101876	0.00100328	0.0001
cg26955850	0.0010105	0.0001
cg01839993	0.00101109	0.0001
cg23672278	0.00101347	0.0001
cg24146100	0.00101936	0.0005
cg03119829	0.00102164	0.0001
cg12492906	0.00102439	0.0005
cg14642088	0.00102833	0.0001
cg23666378	0.00103018	0.0001
cg13332816	0.00103327	0.0001
cg00646813	0.00104263	0.0001
cg06588059	0.0010437	0.0001
cg06739059	0.00104459	0.0013
cg05232215	0.00105791	0.0001
cg17961238	0.00106137	0.0005
cg22821355	0.00106374	0.0001
cg09709951	0.00107256	0.0005
cg15897921	0.00107352	0.0001
cg04855791	0.00107366	0.0001
cg26957187	0.00107637	0.0069
cg02014108	0.00107954	0.0001
cg00540640	0.00108023	0.0001
cg24825866	0.00109383	0.0001
cg23281123	0.00109584	0.0001
cg10548272	0.00110454	0.0001
cg03355875	0.00110797	0.0001
cg10929921	0.0011122	0.0001
cg15982002	0.0011122	0.0001
cg04370983	0.00111912	0.0005
cg04842552	0.00112063	0.0041
cg07787313	0.00112289	0.0013
cg17808676	0.00112547	0.0001
cg11325247	0.00113091	0.0001
cg18262201	0.00114366	0.0001
cg27379915	0.00114715	0.0001
cg16732077	0.00116205	0.0001
cg10597359	0.00116303	0.0001
cg01517832	0.00117186	0.0005
cg26271591	0.00117619	0.0005
cg16165748	0.00118484	0.0001
cg15376996	0.00118526	0.0017
cg17642685	0.00118714	0.0001
cg20405811	0.00119699	0.0001
[truncated: 1,341 more rows]
